# Supplementary material
Source: PubMed Central journal article supplement (PMC3033432)
Supplement: NIHMS228615-supplement-1_si_001.pdf [file NIHMS228615-supplement-1_si_001.pdf]

**Supporting information for**  
**Catalyst Controlled Formal [4+3] Cycloaddition Applied to the**  
**Total Synthesis of (+)-Barekoxide and (-)-Barekol**

Yajing Lian, Laura C. Miller, Stephen Born, Richmond Sarpong\* and Huw M. L. Davies\*

*Department of Chemistry, Emory University, 1515 Dickey Drive, Atlanta, Georgia 30322*

*Department of Chemistry, University of California, Berkeley, California 94720*

**Supporting Information**

|                                                            |      |
|------------------------------------------------------------|------|
| The synthetic scheme of <i>cis</i> -[4.3.0] bicyclic diene | S-2  |
| The synthetic scheme of <i>cis</i> -[4.4.0] bicyclic diene | S-2  |
| The synthetic scheme of Barekoxide and Barekol             | S-3  |
| Experimental Procedure                                     | S-4  |
| <sup>1</sup> H and <sup>13</sup> C NMR Spectra             | S-27 |
| Crystallographic Data of Barekol                           | S-57 |

Scheme S1: The synthetic route to *cis*-[4.3.0] bicyclic diene (*S*)-7

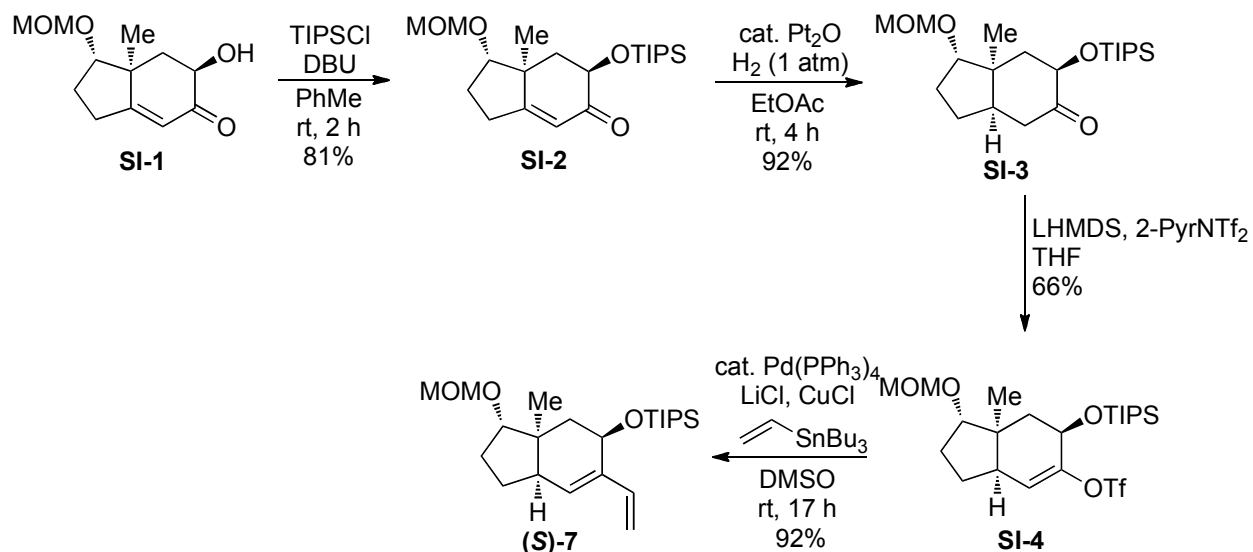

Scheme S2: The synthetic route to *cis*-[4.4.0] bicyclic diene (*S*)-10, (*S*)-13, (*S*)-16

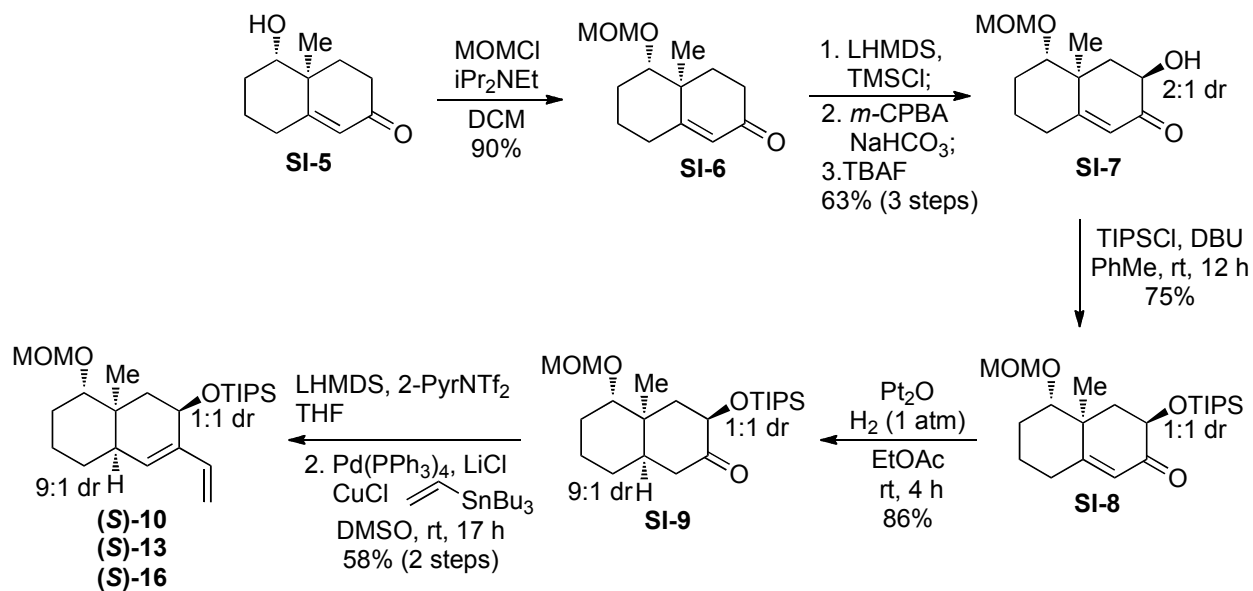

Scheme S3: The complete synthetic route to Barekoxide and Barekol

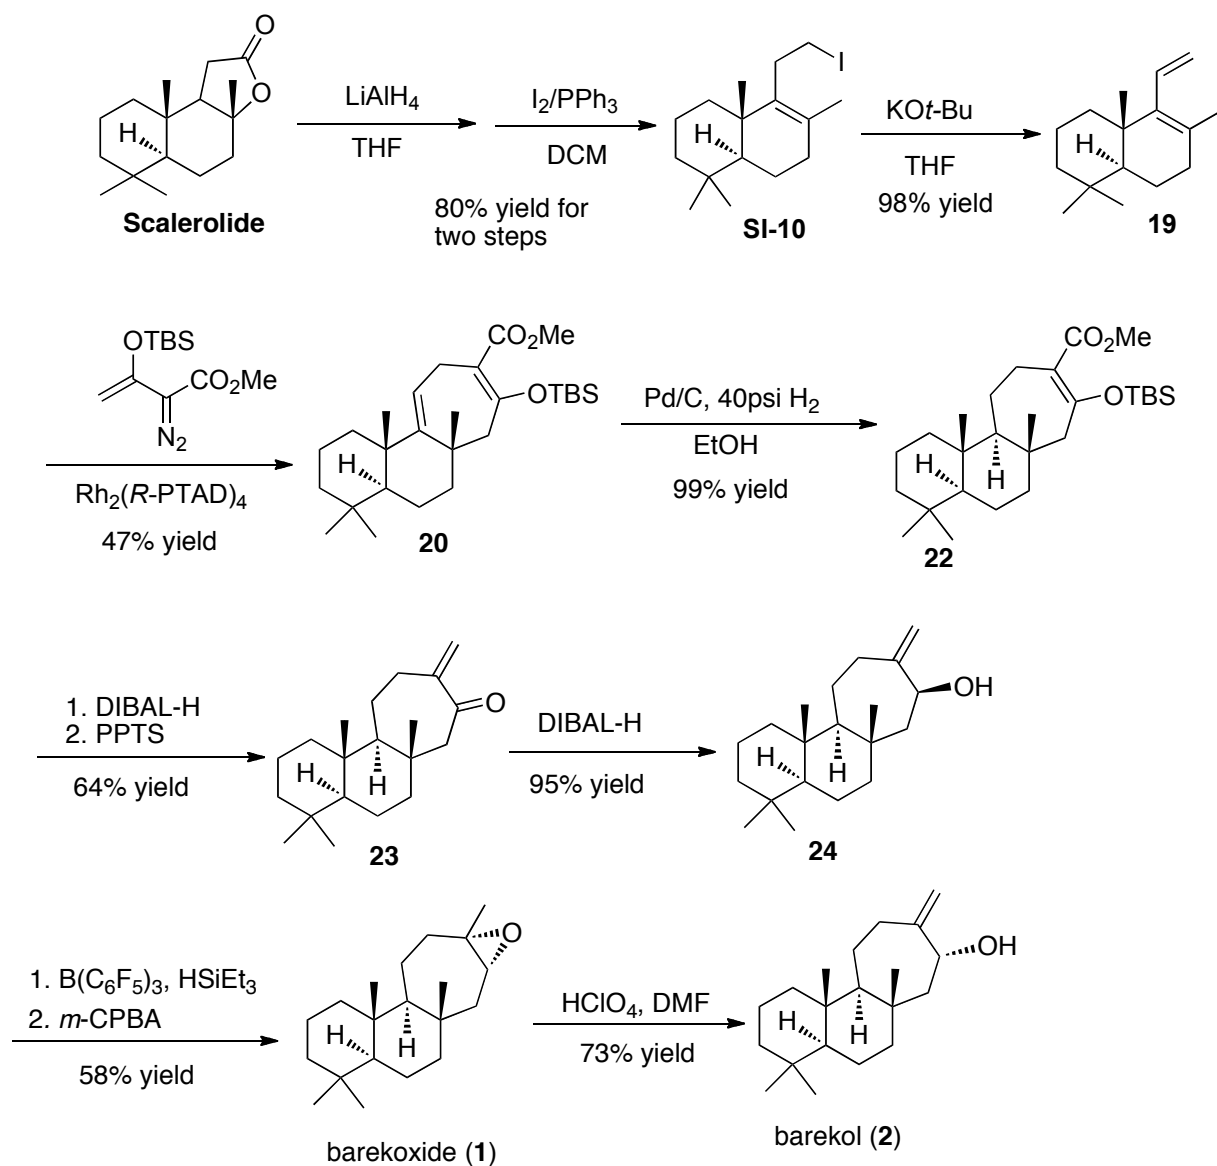

**General Methods:** All experiments were performed under anhydrous conditions in an atmosphere of argon except where stated, using flame-dried glassware. Toluene and hexane were dried by a solvent purification system (passed through activated alumina columns). Unless otherwise noted, all other reagents were obtained from commercial sources and used as received. <sup>1</sup>H Nuclear Magnetic Resonance (NMR) spectra were recorded at 400 or 600 MHz. Data are presented as follows: chemical shift (in ppm on the  $\delta$  scale relative to  $\delta$ H 7.26 for the residual protons in CDCl<sub>3</sub> and  $\delta$ H 7.15 for the residual protons in C<sub>6</sub>D<sub>6</sub>), multiplicity (s = singlet, d = doublet, t = triplet, q = quartet, m = multiplet, br = broad), coupling constant (*J*/Hz), integration. Coupling constants were taken directly from the spectra and are uncorrected. <sup>13</sup>C NMR spectra were recorded at 100 or 150 MHz, and all chemical shift values are reported in ppm on the  $\delta$  scale, with an internal reference of  $\delta$ C 77.0 for CDCl<sub>3</sub> and  $\delta$ C 128.02 for C<sub>6</sub>D<sub>6</sub>. Mass spectral determinations were carried out by using APCI as ionization source. Melting points are uncorrected. Infrared spectral data are reported in units of cm<sup>-1</sup>. Analytical TLC was performed on silica gel plates using UV light or potassium permanganate stain if stated. Flash column chromatography was performed on silica gel 60A (230-400 mesh). Optical rotations were measured on Jasco polarimeters. Analytical enantioselective chromatographies were measured on Varian Prostar instrument and used isopropanol/hexane as gradient.

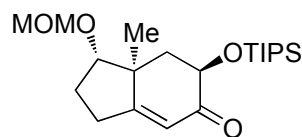

**SI-2**

**(1*S*,6*R*,7*aS*)-1-(methoxymethoxy)-7*a*-methyl-6-((triisopropylsilyl)oxy)-2,3,7,7*a*-tetrahydro-1*H*-inden-5(6*H*)-one SI-2:**  $\alpha$ -Hydroxy Enone **SI-1** (3.33 g, 14.58 mmol) was dissolved in PhMe (40 mL) at rt. TIPSCl (2.95 mL, 17.64 mmol) and DBU (2.61 mL, 17.64 mmol) were added sequentially. After stirring overnight (ca. 12 h), water (60 mL) was added, and the aqueous layer was separated and extracted with EtOAc (3 x 40 mL). The organic layers were combined, dried over MgSO<sub>4</sub> and concentrated. The crude product was purified by flash chromatography (4:1 hexanes/EtOAc) to give 3.20 g of **SI-2** as a clear oil in 81% yield (BRSM).  $R_f$  0.59 (2:1 hexanes/EtOAc); <sup>1</sup>H NMR (500 MHz, CDCl<sub>3</sub>)  $\delta$  5.74 (t,  $J$  = 1.2 Hz, 1H), 4.67 (d,  $J$  = 6.7 Hz, 1H), 4.65 (d,  $J$  = 6.5 Hz, 1H), 4.49 (dd,  $J$  = 13.0, 5.5 Hz, 1H), 3.67 (dd,  $J$  = 10.0, 8.0 Hz, 1H), 3.37 (s, 3H), 2.68 (dd,  $J$  = 19.0, 12.0 Hz, 1H), 2.40-2.33 (m, 2H), 2.18-2.13 (m, 1H), 1.92-1.78 (m, 2H), 1.24 (s, 3H), 1.17-1.06 (m, 21H); <sup>13</sup>C NMR (100 MHz, CDCl<sub>3</sub>)  $\delta$  197.7, 171.6, 122.2, 96.2, 85.3, 70.6, 55.3, 46.4, 45.2, 26.8, 26.3, 17.99, 17.95, 16.6, 12.4; IR (film)  $\nu_{max}$  2942, 2866, 16898, 1464, 1210, 1151, 1090, 1048 cm<sup>-1</sup>; HRMS (ESI<sup>+</sup>) calcd for [C<sub>21</sub>H<sub>38</sub>NaO<sub>4</sub>Si]<sup>+</sup> (M+Na)<sup>+</sup>:  $m/z$  405.2437, found 405.2440.

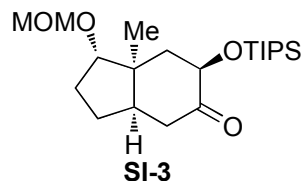

**SI-3**

**(1*S*,3*aR*,6*R*,7*aS*)-1-(methoxymethoxy)-7*a*-methyl-6-((triisopropylsilyl)oxy)hexahydro-1*H*-inden-5(6*H*)-one SI-3:** Enone **SI-2** (3.18 g, 8.30 mmol) and PtO<sub>2</sub> (57 mg, 0.25 mmol) were combined in 66 mL EtOAc. The flask was evacuated and backfilled with hydrogen (3x) and stirred under an atmosphere of hydrogen for 1 h. The solution was filtered through Celite and concentrated. The crude product was purified by flash chromatography (gradient of 9:1 hexanes/EtOAc to 4:1 hexanes/EtOAc) to give 2.93 g of ketone **SI-3** as a clear oil in a 92% yield.  $R_f$  0.48 (5:1 hexanes/EtOAc); <sup>1</sup>H NMR (400 MHz, CDCl<sub>3</sub>)  $\delta$  4.66 (d,  $J$  = 6.8 Hz, 1H), 4.56 (d,  $J$  = 6.8, 1H), 4.47 (dd,  $J$  = 11.6, 6.4 Hz, 1H), 3.67 (d,  $J$  = 4.4 Hz, 1H), 3.36 (s, 3H), 2.51 (dd,  $J$  = 14.8, 6.8 Hz, 1H), 2.35-2.29 (m, 2H), 2.11-2.02 (m, 1H), 1.94-1.82 (m, 2H), 1.69-1.59 (m, 2H), 1.32 (s, 3H), 1.40-1.28 (m, 1H), 1.12-1.03 (m, 21H); <sup>13</sup>C NMR (100 MHz, CDCl<sub>3</sub>)  $\delta$  209.3, 95.1, 84.7, 73.2, 55.5, 46.0, 45.0, 43.6, 40.2, 28.9, 27.8, 19.2, 17.89, 17.87, 12.2; IR (film)  $\nu_{max}$

2943, 2866, 1733, 1465, 1180, 1147, 1117, 1047  $\text{cm}^{-1}$ ; HRMS (ESI<sup>+</sup>) calcd for  $[\text{C}_{21}\text{H}_{40}\text{NaO}_4\text{Si}]^+(\text{M}+\text{Na})^+$ :  $m/z$  407.2594, found 407.2603.

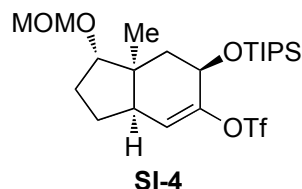

**(1S,3aR,6R,7aS)-1-(methoxymethoxy)-7a-methyl-6-((triisopropylsilyl)oxy)-2,3,3a,6,7,7a-hexahydro-1H-inden-5-yl trifluoromethanesulfonate SI-4:** HMDS (1.8 mL, 8.53 mmol) was dissolved in THF (68 mL) and cooled to  $-78\text{ }^\circ\text{C}$ . *n*-BuLi (4.1 mL, 1.9 M in hexanes, 7.76 mmol) was added dropwise. After 40 min. at  $-78\text{ }^\circ\text{C}$ , ketone **SI-3** (2.71 g, 7.05 mmol) in THF (5 mL) was added dropwise. The reaction was maintained at  $-78\text{ }^\circ\text{C}$  for 1.5 h, after which 2-pyrNTf<sub>2</sub> (2.78 g, 7.76 mmol) in THF (5 mL) was added. After an additional 30 min at  $-78\text{ }^\circ\text{C}$ , the cold bath was removed, and the reaction mixture was stirred at rt for 30 min. The reaction mixture was quenched by the addition of sat. aq. NH<sub>4</sub>Cl (30 mL). The solution was separated and extracted with EtOAc (3 x 35 mL). The combined organic layers were dried over MgSO<sub>4</sub> and concentrated to give a golden orange oil. Flash chromatography (gradient of 20:1 hexanes/EtOAc to 4:1 hexanes/EtOAc) gave enol triflate **SI-4** (2.39 g, 66% yield) as a clear oil.  $R_f$  0.35 (9:1 hexanes/EtOAc); <sup>1</sup>H NMR (400 MHz, CDCl<sub>3</sub>)  $\delta$  5.80 (d,  $J = 5.2$  Hz, 1H), 4.65 (d,  $J = 6.4$  Hz, 1H), 4.60 (t,  $J = 6.0$  Hz, 1H), 4.58 (d,  $J = 6.8$  Hz, 1H), 3.77 (t,  $J = 4.0$  Hz, 1H), 3.36 (s, 3H), 2.41 (dd,  $J = 13.6, 8.4$  Hz, 1H), 2.18-2.07 (m, 2H), 1.82 (dd,  $J = 13.2, 6.0$  Hz, 1H), 1.77-1.69 (m, 2H), 1.57-1.50 (m, 1H), 1.11-1.05 (m, 24H); <sup>13</sup>C NMR (100 MHz, CDCl<sub>3</sub>)  $\delta$  148.5, 122.2, 95.7, 84.6, 66.0, 55.4, 44.6, 43.7, 41.5, 30.3, 28.8, 19.8, 18.1, 12.7; IR (film)  $\nu_{\text{max}}$  1645, 1420, 1208, 1145  $\text{cm}^{-1}$ ; HRMS (ESI<sup>+</sup>) calcd for  $[\text{C}_{22}\text{H}_{39}\text{F}_3\text{NaO}_6\text{SSi}]^+(\text{M}+\text{Na})^+$ :  $m/z$  539.2086, found 539.3951.

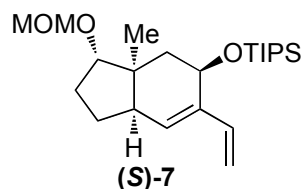

**triisopropyl(((3S,3aS,5R,7aR)-3-(methoxymethoxy)-3a-methyl-6-vinyl-2,3,3a,4,5,7a-hexahydro-1H-inden-5-yl)oxy)silane (S)-7:** Anhydrous LiCl (1.06 g, 25.08 mmol) was added to a Schlenk flask, which was heated to  $120\text{ }^\circ\text{C}$  under vacuum for 18 h. After cooling to rt and backfilling with N<sub>2</sub>, Pd(PPh<sub>3</sub>)<sub>4</sub> (0.483 g, 0.418 mmol) and CuCl (2.184 g, 22.07 mmol) were

added. The Schlenk flask was evacuated and backfilled with N<sub>2</sub> (4x). A solution of enol triflate **SI-4** (2.16 g, 4.18 mmol) and vinyl tributylstannane (1.99 g, 6.27 mmol) in DMSO (35 mL) was added to the Schlenk flask, and then the mixture was sparged with N<sub>2</sub> for 15 min. The dark red-brown solution was stirred at rt for 17 h, before it was diluted with Et<sub>2</sub>O (40 mL) and washed with a 5:1 brine/5% NH<sub>4</sub>OH solution (40 mL). The aqueous layer was extracted with Et<sub>2</sub>O (40 mL), and the combined organic layers were washed sequentially with H<sub>2</sub>O (2 x 40 mL) and brine (2 x 40 mL). After drying over Na<sub>2</sub>SO<sub>4</sub> and concentrating, the crude product was purified by flash chromatography (gradient of 20:1 hexanes/EtOAc) to afford diene (**S**)-**7** (1.52 g) as a clear oil in 92% yield. R<sub>f</sub> 0.64 (20:1 hexanes/EtOAc); <sup>1</sup>H NMR (400 MHz, CDCl<sub>3</sub>) δ 6.46 (dd, *J* = 16.0, 8.0 Hz, 1H), 5.89 (d, *J* = 4.0 Hz, 1H), 5.36 (d, *J* = 16.0 Hz, 1H), 4.97 (d, *J* = 12.0 Hz, 1H), 4.68 (d, *J* = 4.0 Hz, 1H), 4.60 (d, *J* = 8.0 Hz, 1H), 4.58-4.55 (m, 1H), 3.70 (t, *J* = 4.0 Hz, 1H), 3.37 (s, 3H), 2.26-2.21 (m, 1H), 2.11-2.04 (m, 2H), 1.73-1.60 (m, 3H), 1.54-1.28 (m, 4H), 1.09 (s, 21H), 1.03 (s, 3H); <sup>13</sup>C NMR (100 MHz, CDCl<sub>3</sub>) δ 138.1, 136.2, 128.0, 112.5, 95.5, 86.2, 67.5, 55.3, 44.6, 44.3, 41.7, 30.5, 29.6, 20.3, 18.33, 18.28, 12.9; IR (film) ν<sub>max</sub> 2945, 2868, 1641, 1464, 1421, 1383, 1247, 1209, 1147, 1096, 1042 cm<sup>-1</sup>; HRMS (ESI<sup>+</sup>) calcd for [C<sub>23</sub>H<sub>42</sub>NaO<sub>3</sub>Si]<sup>+</sup> (M+Na)<sup>+</sup>: m/z 417.2801, found 417.2805.

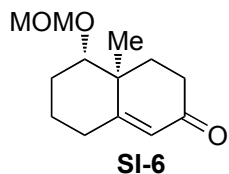

**(4a*S*,5*S*)-5-(methoxymethoxy)-4a-methyl-4,4a,5,6,7,8-hexahydronaphthalen-2(3*H*)-one SI-6:** To a solution of alcohol **SI-5** (22.78 g, 126.4 mmol) in DCM (316 ml, 0.4M) at 0 °C was added MOMCl (19.20 ml, 258.8 mmol) and *i*-Pr<sub>2</sub>NEt (28.20 ml, 158.0 mmol) dropwise, and allowed to warm to room temperature. Upon completion (5 h), the reaction was quenched with sat. NH<sub>4</sub>Cl and stirred vigorously for 15 min. The organic phase was separated, and the aqueous extracted three times with DCM. The combined organics were washed with brine, dried over MgSO<sub>4</sub>, concentrated, and purified by flash chromatography (2:1 hexanes/EtOAc) to give MOM ether **SI-6** (25.50 g) as a clear oil in 90% yield. R<sub>f</sub> 0.75 (1:1 hexanes/EtOAc); <sup>1</sup>H NMR (400 MHz, CDCl<sub>3</sub>) δ 5.76 (d, *J* = 1.4 Hz, 1H), 4.72 (d, *J* = 5.2 Hz, 1H), 4.61 (d, *J* = 6.8, 1H), 3.37 (s, 3H), 3.30 (dd, *J* = 8.8, 4.4 Hz, 1H), 2.48-2.29 (m, 3H), 2.23-2.16 (m, 2H), 2.03-1.94 (m, 1H), 1.92-1.78 (m, 2H), 1.65 (qd, *J* = 13.2, 3.6 Hz, 1H), 1.36 (qt, *J* = 13.6, 4.4 Hz, 1H), 1.20 (s, 3H); <sup>13</sup>C NMR (100 MHz, CDCl<sub>3</sub>) δ 199.4, 168.2, 125.3, 95.6, 83.6, 55.6, 41.2, 34.3, 33.7, 32.0, 27.1,

23.0, 16.2; IR (film)  $\nu_{\text{max}}$  3446, 2945, 1668, 1143, 1105, 1034  $\text{cm}^{-1}$ ; HRMS (ESI<sup>+</sup>) calcd for  $[\text{C}_{13}\text{H}_{20}\text{NaO}_3]^+$  (M+Na)<sup>+</sup>:  $m/z$  247.1310, found 247.1316.

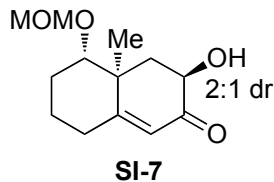

**(3*R*,4*aS*,5*S*)-3-hydroxy-5-(methoxymethoxy)-4*a*-methyl-4,4*a*,5,6,7,8-hexahydronaphthalen-2(3*H*)-one SI-7:** To a solution of hexamethyldisilazane (HMDS) (14.0 mL, 67.44 mmol) in THF (200 mL) at -78 °C was added *n*-BuLi (24.5 mL, 2.5 M in hexanes, 61.31 mmol) dropwise. After 40 min. at -78 °C, a solution of **SI-6** (12.5 g, 55.74 mmol) in 20 mL THF was added dropwise. The resulting orange solution was stirred at -78 °C for 2 h. TMSCl (10.6 mL, 83.61 mmol) was then added dropwise, and the pale yellow solution was stirred at -78 °C for an additional 0.5 h, and then allowed to warm to rt. The mixture was quenched with sat. aq. NaHCO<sub>3</sub> (100 mL). The aqueous layer was quickly extracted with EtOAc (3 x 75 mL). The combined organic layers were brine washed, dried over MgSO<sub>4</sub> and concentrated to give a dark yellow oil. The crude product was dissolved in DCM (200 mL) and the reaction mixture was cooled to -42 °C. To the mixture was added KHCO<sub>3</sub> (27.90 g, 278.7 mmol) and *m*-CPBA (~75%, 19.24 g, 83.61 mmol). The reaction mixture was stirred at -42 °C for 2 h and then allowed to warm to rt. H<sub>2</sub>O (100 mL) was added, and the resulting mixture was extracted with EtOAc (3 x 75 mL). The combined organic layers were dried over MgSO<sub>4</sub> and concentrated. The crude pale yellow solid was dissolved in THF (200 mL) and the mixture was cooled to 0 °C. TBAF (56 mL, 1.0 M in THF, 56.0 mmol) was added. After 15 min, the cold bath was removed, and following 15 min of stirring at rt, the reaction mixture was quenched with sat. aq. NH<sub>4</sub>Cl (100 mL). After extraction with EtOAc (3 x 75 mL), the combined organic layers were washed with brine, dried over MgSO<sub>4</sub> and concentrated to give an orange oil. Flash chromatography (4:1 hexanes/EtOAc to 2:1 to 1:1) gave **SI-7** (8.41 g) as a light yellow oil in 63% yield (2:1 dr).  $R_f$  0.20 (1:1 hexanes/EtOAc); <sup>1</sup>H NMR (\* denotes major diastereomer) (400 MHz, CDCl<sub>3</sub>)  $\delta$  5.84\* + 5.82 (d,  $J = 1.6$  & 1.6 Hz, 1H), 4.76\*, 4.71 (d,  $J = 7.2$  & 6.8 Hz, 1H), 4.66\* + 4.58 (d,  $J = 6.8$  & 6.8 Hz, 1H), 4.29-4.21 (m, 1H), 3.68\* + 3.25 (dd,  $J = 13.2, 5.5$  Hz &  $J = 11.6, 4.0$  Hz, 1H), 3.41\* + 3.36 (s, 3H), 2.68\* + 2.55 (dd,  $J = 19.6, 12.1$  Hz &  $J = 12.8, 6.0$  Hz, 1H), 2.47-2.39\* + 2.35-2.27 (m, 1H), 2.02-1.86 (m, 2H), 1.75-1.58 (m, 2H), 1.51\* (t,  $J = 13.6$  Hz, 1H), 1.30 + 1.17\* (s, 3H) <sup>13</sup>C NMR (100 MHz, CDCl<sub>3</sub>) Major diastereomer:  $\delta$  199.7, 170.3, 120.7, 95.9, 78.1, 68.6, 55.8, 43.7, 38.1, 32.0,



27.2, 25.2, 21.5; Minor diastereomer:  $\delta$  199.7, 170.0, 121.8, 95.6, 83.8, 69.4, 55.7, 43.0, 42.7, 31.9, 26.6, 22.6, 16.7; IR (film)  $\nu_{\text{max}}$  3455, 2946, 1682, 1621, 1447, 1228, 1144, 1108, 1035  $\text{cm}^{-1}$ ; HRMS (ESI<sup>+</sup>) calcd for  $[\text{C}_{13}\text{H}_{20}\text{NaO}_4]^+$  (M+Na)<sup>+</sup>:  $m/z$  263.1259, found 263.1258.

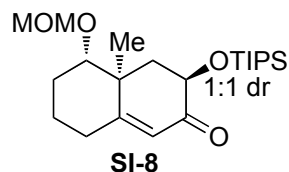

**(3*R*,4*aS*,5*S*)-5-(methoxymethoxy)-4*a*-methyl-3-((triisopropylsilyl)oxy)-4,4*a*,5,6,7,8-**

**hexahydronaphthalen-2(3*H*)-one SI-8:**  $\alpha$ -Hydroxy Enone **SI-7** (4.0 g, 16.65 mmol) was dissolved in PhMe (66 mL) at rt. TIPSCl (4.23 ml, 19.98 mmol) and DBU (3.0 mL, 19.98 mmol) were added sequentially. After stirring overnight (ca. 12 h), water (40 mL) was added, and the aqueous layer was separated and extracted with EtOAc (3 x 50 mL). The organic layers were combined, washed with brine, dried over  $\text{MgSO}_4$  and concentrated. The crude product was purified by flash chromatography (4:1 hexanes/EtOAc) to give 4.938 g of **SI-8** as a clear oil in 92% yield.  $R_f$  0.75 (2:1 hexanes/EtOAc);  $^1\text{H}$  NMR (\* denotes major diastereomer) (400 MHz,  $\text{CDCl}_3$ )  $\delta$  5.76\* + 5.71 (d,  $J = 1.4$  & 1.4 Hz, 1H), 4.75\* + 4.65 & 4.59 (dd,  $J = 6.8, 2.0$  Hz, 1H + d,  $J = 6.8$  Hz & d,  $J = 6.8$  Hz, 1H), 4.43\* + 4.27 (dd,  $J = 13.2, 5.2$  Hz, 1H + dd,  $J = 8.0, 4.8$  Hz, 1H), 3.39\* + 3.38 (s, 3H), 3.47-3.35\* + 3.26 (m + dd,  $J = 12.0, 4.4$  Hz, 1H), 2.43-2.35 (m, 1H), 2.30-2.05 (m, 3H), 2.01-1.84 (m, 2H), 1.76-1.56 (m, 2H), 1.30\* + 1.29 (s, 3H), 1.14-1.04 (m, 21H);  $^{13}\text{C}$  NMR (100 MHz,  $\text{CDCl}_3$ ) Major diastereomer:  $\delta$  197.7, 167.3, 122.8, 96.3, 82.7, 71.1, 55.7, 43.1, 41.5, 32.0, 27.4, 24.2, 20.7, 18.1, 18.0, 12.4, Minor diastereomer:  $\delta$  198.6, 166.0, 123.7, 95.5, 83.9, 71.1, 55.7, 44.8, 42.6, 31.4, 26.6, 22.9, 18.0, 17.7, 16.9, 12.4; IR (film)  $\nu_{\text{max}}$  2943, 2866, 1698, 1465, 1147, 1106, 1036  $\text{cm}^{-1}$ ; HRMS (FAB<sup>+</sup>) calcd for  $[\text{C}_{22}\text{H}_{40}\text{NaO}_4\text{Si}]^+$  (M+Na)<sup>+</sup>:  $m/z$  419.2594, found 419.2601.

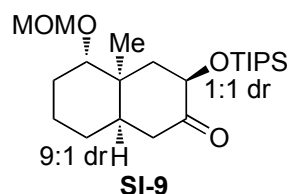

**Ketone SI-9:** Conjugated ketone **SI-8** (4.92 g, 12.40 mmol) and  $\text{PtO}_2$  (84 mg, 0.37 mmol) were combined in 100 mL EtOAc. The flask was evacuated and backfilled with hydrogen (3x) and stirred under an atmosphere of hydrogen for 1 h. The solution was filtered through Celite and concentrated. The crude product was purified by flash chromatography (gradient of 9:1

hexanes/EtOAc to 4:1 hexanes/EtOAc) to give 4.20 g of the ketone **SI-9** as a clear oil in a 91% yield.  $R_f$  0.60 (5:1 hexanes/EtOAc);  $^1\text{H}$  NMR (\* denotes major diastereomer) (600 MHz,  $\text{CDCl}_3$ )  $\delta$  4.69\* + 4.59 & 4.54 (dd,  $J = 6.6, 1.8$  Hz + d,  $J = 6.6$  Hz & d,  $J = 6.6$  Hz, 2H), 4.47\* + 4.16 (dd,  $J = 11.4, 7.2$  Hz + t,  $J = 3.6$ , 1H), 3.39\* + 3.35 (s, 3H), 3.09\* + 2.80 (dd,  $J = 13.8, 5.4$  Hz + t,  $J = 13.8$  Hz, 1H), 2.11-1.96 (m, 3H), 1.77-1.43 (m, 7H), 1.32\* + 1.20 (s, 3H), 1.09-1.01 (m, 21H);  $^{13}\text{C}$  NMR (150 MHz,  $\text{CDCl}_3$ ) Major diastereomer:  $\delta$  210.3, 95.4, 79.8, 75.4, 55.5, 45.2, 42.1, 40.4, 38.7, 27.9, 26.5, 23.3, 19.8, 17.9, 12.3. Minor diastereomer:  $\delta$  209.1, 95.9, 85.1, 73.8, 55.8, 46.3, 39.7, 38.6, 28.1, 25.3, 24.0, 19.6, 17.8, 12.0; IR (film)  $\nu_{\text{max}}$  2942, 2866, 1731, 1147, 1044  $\text{cm}^{-1}$ ; HRMS (ESI $^+$ ) calcd for  $[\text{C}_{22}\text{H}_{42}\text{NaO}_4\text{Si}]^+(\text{M}+\text{Na})^+$ :  $m/z$  421.2750, found 421.2753.

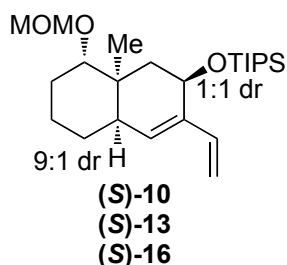

**(S)-10, (S)-13, (S)-16:** HMDS (2.65 mL, 12.68 mmol) was dissolved in THF (95 mL) and cooled to  $-78$   $^{\circ}\text{C}$ . *n*-BuLi (4.60 mL, 2.5 M in hexanes, 11.50 mmol) was added dropwise. After 40 min. at  $-78$   $^{\circ}\text{C}$ , the ketone **SI-9** (4.18 g, 10.49 mmol) in THF (5 mL) was added dropwise. The reaction was maintained at  $-78$   $^{\circ}\text{C}$  for 1 h, after which 2-pyrNTf $_2$  (4.13 g, 11.53 mmol) in THF (5 mL) was added. After an additional 30 min at  $-78$   $^{\circ}\text{C}$ , the cold bath was removed, and the reaction mixture warmed to rt for 30 min. The reaction mixture was quenched by the addition of sat. aq.  $\text{NH}_4\text{Cl}$  (60 mL). The solution was separated and extracted with EtOAc (3 x 40 mL). The combined organic layers were washed with brine, dried over  $\text{MgSO}_4$  and concentrated to give a golden-orange oil. Upon dilution with 9:1 hexane:EtOAc, the solution was filtered and concentrated. Due to the lability of the enol triflate on silica, the crude material was immediately carried on into the subsequent reaction without purification.  $R_f$  0.35 (9:1 hexanes/EtOAc).

Anhydrous LiCl (2.67 g, 62.91 mmol) was added to a Schlenk flask, which was heated to  $120$   $^{\circ}\text{C}$  under vacuum for 18 h. After cooling to rt and backfilling with  $\text{N}_2$ ,  $\text{Pd}(\text{PPh}_3)_4$  (1.21 g, 1.05 mmol) and CuCl (5.48 g, 55.36 mmol) were added. The Schlenk flask was evacuated and backfilled with  $\text{N}_2$  (4x). A solution of enol triflate (5.56 g, 10.49 mmol) and vinyl tributylstannane (4.60 mL, 15.73 mmol) in DMSO (87 mL) was added to the Schlenk flask, and then the mixture was sparged with  $\text{N}_2$  for 15 min. The dark red-brown solution was stirred at rt for 17 h, before it was diluted with  $\text{Et}_2\text{O}$  (100 mL) and washed with a 5:1 brine/5%  $\text{NH}_4\text{OH}$

solution (60 mL). The aqueous layer was extracted with Et<sub>2</sub>O (40 mL), and the combined organic layers were washed sequentially with H<sub>2</sub>O (2 x 60 mL) and brine (2 x 60 mL). In order to remove the organotin impurities, KF/Celite was added and allowed to stir for 1 h, which upon filtering, drying over Na<sub>2</sub>SO<sub>4</sub> and concentrating, the crude product was purified by flash chromatography (gradient of 20:1 hexanes/EtOAc) to afford the diene (2.50 g) as a mixture of three isomers in 58% yield (2 steps). R<sub>f</sub> 0.64 (20:1 hexanes/EtOAc). The ratio of (*S*)-**10**/*S*-**13**/*S*-**16** was 5/4/1. Careful column chromatography on silica gel (20:1 pentane/Et<sub>2</sub>O, R<sub>f</sub> = 0.54 for (*S*)-**13**; R<sub>f</sub> = 0.41 for (*S*)-**10**; R<sub>f</sub> = 0.39 for (*S*)-**16**) provided (*S*)-**13** as a pure colorless oil and a mixture of (*S*)-**10** and (*S*)-**16**, which were further purified on silica gel (3:1 pentane/methylene chloride, R<sub>f</sub> = 0.47 for (*S*)-**10**; R<sub>f</sub> = 0.43 for (*S*)-**16**).

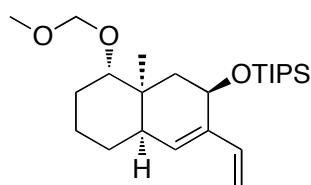

**(S)-10**

**triisopropyl(((2*R*,4*aR*,8*S*,8*aS*)-8-(methoxymethoxy)-8*a*-methyl-3-vinyl-1,2,4*a*,5,6,7,8,8*a*-octahydronaphthalen-2-yl)oxy)silane (*S*)-10:** <sup>1</sup>H NMR (400 MHz, CDCl<sub>3</sub>): δ 6.35 (dd, *J* = 17.4, 11.0 Hz, 1H), 5.82 (d, *J* = 5.5 Hz, 1H), 5.36 (dd, *J* = 17.6, 1.8 Hz, 1H), 4.97 (dd, *J* = 11.0, 1.8 Hz, 1H), 4.70 (d, *J* = 7.0 Hz, 1H), 4.61 (d, *J* = 7.0 Hz, 1H), 4.57-4.62 (m, 1H), 3.39 (s, 3H), 3.32-3.35 (m, 1H), 1.92-1.03 (m, 2H), 1.67-1.77 (m, 2H), 1.55-1.66 (m, 2H), 1.41-1.53 (m, 2H), 1.22-1.34 (m, 1H), 1.06-1.12 (m, 21H), 0.99 (s, 3H); <sup>13</sup>C NMR (100 MHz, CDCl<sub>3</sub>): δ 136.9, 136.8, 130.7, 112.7, 96.0, 80.4, 68.5, 55.7, 39.0, 38.5, 37.5, 29.8, 26.0, 21.7, 19.8, 18.4, 18.3, 13.0; IR (neat): 2939, 2865, 1436, 1097, 1036, 1011, 917, 883, 679 cm<sup>-1</sup>; HRMS (ESI) calc. for C<sub>24</sub>H<sub>44</sub>O<sub>3</sub>NaSi (M+Na)<sup>+</sup> 431.2952 found 431.2953; [α]<sub>D</sub><sup>25</sup> 16.3 (*c* = 2.07, CHCl<sub>3</sub>).

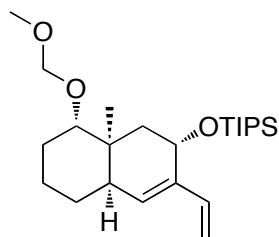

**(S)-13**

**triisopropyl(((2*S*,4*aR*,8*S*,8*aS*)-8-(methoxymethoxy)-8*a*-methyl-3-vinyl-1,2,4*a*,5,6,7,8,8*a*-octahydronaphthalen-2-yl)oxy)silane (*S*)-13:** <sup>1</sup>H NMR (400 MHz, CDCl<sub>3</sub>): δ 6.33 (dd, *J* = 17.7, 11.0 Hz, 1H), 5.57 (t, *J* = 0.9 Hz, 1H), 5.35 (dm, *J* = 17.7 Hz, 1H), 4.97 (d, *J* = 11.3 Hz,

1H), 4.64-4.69 (m, 2H), 4.56-4.63 (m, 1H), 3.35 (s, 3H), 3.34-3.39 (m, 1H), 2.39 (dd,  $J = 12.8$ , 6.4 Hz, 1H), 2.32 (br, 1H), 1.67-1.85 (m, 2H), 1.18-1.58 (m, 5H), 1.07-1.11 (m, 21H), 1.02 (s, 3H);  $^{13}\text{C}$  NMR (150 MHz,  $\text{CDCl}_3$ ):  $\delta$  139.4, 136.5, 131.4, 113.0, 96.9, 77.9, 67.6, 55.3, 43.3, 43.0, 39.2, 28.3, 27.2, 21.2, 20.7, 18.4, 18.3, 13.0; IR (neat): 2941, 2866, 1465, 1105, 1045, 918, 883, 678  $\text{cm}^{-1}$ ; HRMS (ESI) calc. for  $\text{C}_{24}\text{H}_{44}\text{O}_3\text{NaSi}$  ( $\text{M}+\text{Na}$ ) $^+$  431.2952 found 431.2953;  $[\alpha]_{\text{D}}^{25}$  -5.3 ( $c = 1.51$ ,  $\text{CHCl}_3$ ).

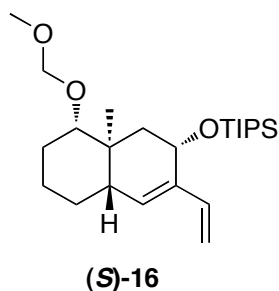

**triisopropyl(((2*S*,4*aS*,8*S*,8*aS*)-8-(methoxymethoxy)-8*a*-methyl-3-vinyl-1,2,4*a*,5,6,7,8,8*a*-octahydronaphthalen-2-yl)oxy)silane (S)-16:**  $^1\text{H}$  NMR (400 MHz,  $\text{CDCl}_3$ ):  $\delta$  6.35 (dd,  $J = 17.4$ , 11.0 Hz, 1H), 5.57 (s, 1H), 5.38 (dm,  $J = 17.7$  Hz, 1H), 4.99 (d,  $J = 11.2$  Hz, 1H), 4.72 (d,  $J = 7.0$  Hz, 1H), 4.59 (d,  $J = 6.7$  Hz, 1H), 4.53 (d,  $J = 5.2$  Hz, 1H), 3.40 (s, 3H), 3.16 (dd,  $J = 11.0$ , 4.3 Hz, 1H), 2.35 (d,  $J = 13.7$  Hz, 1H), 1.72-1.82 (m, 3H), 1.52-1.62 (m, 1H), 1.30-1.50 (m, 4H), 1.06-1.12 (m, 21H), 0.99 (s, 3H);  $^{13}\text{C}$  NMR (100 MHz,  $\text{CDCl}_3$ ):  $\delta$  137.65, 137.59, 129.2, 112.4, 95.5, 83.6, 66.2, 55.43, 55.41, 44.4, 43.8, 36.98, 26.9, 26.3, 24.4, 18.3, 13.1, 11.5; IR (neat): 2941, 2865, 1465, 1142, 1038, 931, 882, 771, 675  $\text{cm}^{-1}$ ; HRMS (ESI) calc. for  $\text{C}_{24}\text{H}_{44}\text{O}_3\text{NaSi}$  ( $\text{M}+\text{Na}$ ) $^+$  431.2952 found 431.2953;  $[\alpha]_{\text{D}}^{25}$  -8.0 ( $c = 2.33$ ,  $\text{CHCl}_3$ ).

### General procedure for the enantiodivergent [4 + 3] cycloadditions

A solution of methyl 3-((*tert*-butyldimethylsilyl)oxy)-2-diazobut-3-enoate (**4**) (46.7 mg, 0.18 mmol, 3.0 equiv.) in dried toluene (3 mL) was added dropwise to a stirred solution of diene and Rh<sub>2</sub>(PTAD)<sub>4</sub> (1.9 mg, 2 mol %) in toluene (3 mL) at 0 °C or room temperature under argon atmosphere over 3 h by syringe pump. The contents were stirred for additional 1 h and then heated to 60 °C for 1 h. The solution was then cooled to room temperature and concentrated *in vacuo*. The residue was then purified by flash chromatography to give product as a colorless oil.

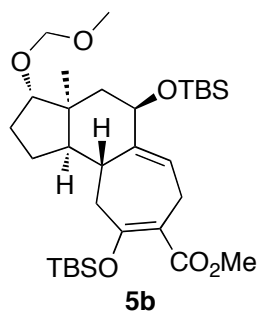

**(3*S*,3*aS*,5*R*,10*aR*,10*bR*)-methyl 5,9-bis((*tert*-butyldimethylsilyl)oxy)-3-(methoxymethoxy)-3*a*-methyl-1,2,3,3*a*,4,5,7,10,10*a*,10*b*-decahydrocyclohepta[*e*]indene-8-carboxylate (**5b**):**

Derived from methyl 3-((*tert*-butyldimethylsilyl)oxy)-2-diazobut-3-enoate (**4**) (46.7 mg, 0.18 mmol, 3.0 equiv.) and diene **S-3**<sup>1</sup> (21.2 mg, 0.06 mmol, 1.0 equiv.) with Rh<sub>2</sub>(*R*-PTAD)<sub>4</sub> (1.9 mg, 2 mol %) at 0 °C, and purified by flash chromatography (10:1 pentane/Et<sub>2</sub>O, R<sub>f</sub> = 0.38) to give product (**5b**) (28.3 mg, 81% yield) as a colorless oil. <sup>1</sup>H NMR (400 MHz, CDCl<sub>3</sub>): δ 5.70 (t, *J* = 6.0 Hz, 1H), 4.70 (d, *J* = 6.4 Hz, 1H), 4.64 (d, *J* = 6.4 Hz, 1H), 4.41 (t, *J* = 8.3 Hz, 1H), 4.08 (t, *J* = 4.0 Hz, 1H), 3.67 (s, 3H), 3.34 (s, 3H), 3.00 (dd, *J* = 6.4, 1.6 Hz, 2H), 2.61 (dd, *J* = 13.3, 3.2 Hz, 1H), 2.35-2.48 (m, 2H), 1.94-2.06 (m, 3H), 1.57-1.64 (m, 1H), 1.40-1.52 (m, 3H), 0.95 (s, 9H), 0.87 (s, 3H), 0.85 (s, 9H), 0.17 (s, 3H), 0.16 (s, 3H), 0.01 (s, 3H), -0.02 (s, 3H); <sup>13</sup>C NMR (100 MHz, CDCl<sub>3</sub>): δ 167.6, 161.9, 143.4, 122.5, 113.1, 97.0, 83.9, 75.8, 55.2, 51.0, 50.5, 43.5, 41.5, 37.7, 34.8, 28.4, 25.9, 25.7, 25.1 (2C), 23.6, 18.3, 18.1, -3.6, -3.9, -4.6, -4.7; IR (neat): 2951, 2928, 1691, 1201, 1147, 1044, 886, 827, 775 cm<sup>-1</sup>; HRMS (APCI) calc. for C<sub>31</sub>H<sub>57</sub>O<sub>6</sub>Si<sub>2</sub> (M+H)<sup>+</sup> 581.3688 found 581.3696; [α]<sub>D</sub><sup>25</sup> -15.0 (*c* = 1.34, CHCl<sub>3</sub>). For the reaction beginning with racemic diene **3** in the presence of Rh<sub>2</sub>(*R*-PTAD)<sub>4</sub>, HPLC of product **5b**: (AD-H, 0.3% isopropanol in hexane, 0.7 mL/min) retention times of 6.1 min (minor) and 6.9 min (major), 90% ee.

<sup>1</sup> Miller, L. C.; Ndungu, J. M.; Sarpong, R. *Angew. Chem. Int. Ed.* **2009**, *48*, 2398.

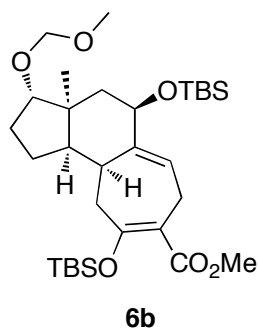

**(3*S*,3*aS*,5*R*,10*aS*,10*bR*)-methyl 5,9-bis(*tert*-butyldimethylsilyloxy)-3-(methoxymethoxy)-3*a*-methyl-1,2,3,3*a*,4,5,7,10,10*a*,10*b*-decahydrocyclohepta[*e*]indene-8-carboxylate (**6b**):**

Derived from methyl 3-((*tert*-butyldimethylsilyloxy)-2-diazobut-3-enoate (**4**) (46.7 mg, 0.18 mmol, 3.0 equiv.) and diene **3** (21.2 mg, 0.06 mmol, 1.0 equiv.) with Rh<sub>2</sub>(*S*-PTAD)<sub>4</sub> (1.9 mg, 2 mol %) at 0 °C, and purified by flash chromatography (10:1 pentane/Et<sub>2</sub>O, R<sub>f</sub> = 0.25) to give product (**6b**) (27.8 mg, 80% yield) as a colorless oil. <sup>1</sup>H NMR (400 MHz, CDCl<sub>3</sub>): δ 6.03–6.07 (m, 1H), 4.66 (d, *J* = 6.7 Hz, 1H), 4.55 (d, *J* = 6.7 Hz, 1H), 3.95–3.99 (m, 1H), 3.69 (s, 3H), 3.56 (d, *J* = 5.4 Hz, 1H), 3.37 (s, 3H), 2.94–3.12 (m, 3H), 2.51–2.55 (m, 1H), 1.99–2.09 (m, 2H), 1.52–1.87 (m, 4H), 1.42–1.46 (m, 1H), 1.16 (s, 3H), 1.08–1.21 (m, 1H), 0.96 (s, 9H), 0.89 (s, 9H), 0.18 (s, 3H), 0.16 (s, 3H), 0.05 (s, 3H), 0.03 (s, 3H); <sup>13</sup>C NMR (100 MHz, CDCl<sub>3</sub>): δ 167.4, 161.8, 139.9, 120.1, 113.5, 95.1, 85.8, 70.0, 55.5, 51.0, 49.6, 46.0, 42.6, 39.5, 34.8, 28.5, 25.9, 25.7, 24.4, 23.6, 19.0, 18.43, 18.41, -4.0, -4.1, -4.9, -5.0; IR (neat): 2951, 2929, 2857, 1714, 1692, 1361, 1252, 1189, 1148, 1097, 1033, 829, 776 cm<sup>-1</sup>; HRMS (APCI) calc. for C<sub>31</sub>H<sub>57</sub>O<sub>6</sub>Si<sub>2</sub> (M+H)<sup>+</sup> 581.3688 found 581.3692; [α]<sub>D</sub><sup>25</sup> 39.8 (*c* = 1.43, CHCl<sub>3</sub>). For the reaction beginning with racemic diene **3** in the presence of Rh<sub>2</sub>(*R*-PTAD)<sub>4</sub>, HPLC of product **6b**: ((*S,S*)-DACH DNB, 0.3% isopropanol in hexane, 0.7 mL/min) retention times of 15.0 min (major) and 16.7 min (minor), 99% ee.

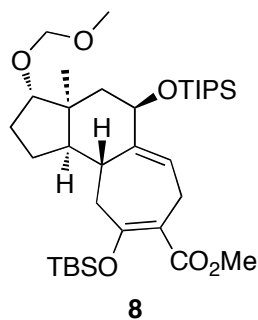

**(3*S*,3*aS*,5*R*,10*aR*,10*bR*)-methyl 9-((*tert*-butyldimethylsilyl)oxy)-3-(methoxymethoxy)-3a-methyl-5-((triisopropylsilyl)oxy)-1,2,3,3*a*,4,5,7,10,10*a*,10*b*-decahydrocyclohepta[*e*]indene-8-carboxylate (**8**):** Derived from methyl 3-((*tert*-butyldimethylsilyl)oxy)-2-diazobut-3-enoate (**4**) (46.7 mg, 0.18 mmol, 3.0 equiv.) and diene (**S**)-**7** (23.7 mg, 0.06 mmol, 1.0 equiv.) with Rh<sub>2</sub>(*R*-PTAD)<sub>4</sub> (1.9 mg, 2 mol %) at 0 °C, and purified by flash chromatography (10:1 pentane/Et<sub>2</sub>O, R<sub>f</sub> = 0.55) to give product **8** (30.6 mg, 82% yield) as a colorless oil. <sup>1</sup>H NMR (600 MHz, CDCl<sub>3</sub>): δ 5.71 (t, *J* = 6.2 Hz, 1H), 4.68 (d, *J* = 6.2 Hz, 1H), 4.64 (d, *J* = 6.24 Hz, 1H), 4.47 (t, *J* = 8.1 Hz, 1H), 4.16 (t, *J* = 3.8 Hz, 1H), 3.67 (s, 3H), 3.34 (s, 3H), 3.00 (d, *J* = 5.7 Hz, 2H), 2.58-2.64 (m, 1H), 2.42-2.50 (m, 2H), 1.96-2.08 (m, 3H), 1.60-1.67 (m, 1H), 1.45-1.54 (m, 2H), 1.42 (dd, *J* = 14.3, 4.3 Hz, 1H), 0.99-1.06 (m, 21H), 0.95 (s, 9H), 0.87 (s, 3H), 0.17 (s, 3H), 0.16 (s, 3H); <sup>13</sup>C NMR (100 MHz, CDCl<sub>3</sub>): δ 167.6, 161.9, 143.4, 122.4, 113.1, 97.2, 84.2, 76.0, 55.3, 50.9, 50.7, 43.6, 41.6, 37.8, 34.6, 28.4, 25.7, 25.0, 24.9, 23.7, 18.3, 18.2, 18.1, 12.3, -3.6, -3.9; IR (neat): 2944, 2864, 1718, 1691, 1463, 1372, 1202, 1148, 1046, 883, 827 cm<sup>-1</sup>; HRMS (APCI) calc. for C<sub>34</sub>H<sub>63</sub>O<sub>6</sub>Si<sub>2</sub> (M+H)<sup>+</sup> 623.4163 found 623.4164; [α]<sub>D</sub><sup>25</sup> -17.6 (*c* = 1.83, CHCl<sub>3</sub>).

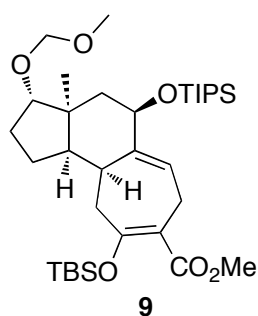

**(3*S*,3*aS*,5*R*,10*aS*,10*bR*)-methyl 9-((*tert*-butyldimethylsilyl)oxy)-3-(methoxymethoxy)-3a-methyl-5-((triisopropylsilyl)oxy)-1,2,3,3*a*,4,5,7,10,10*a*,10*b*-decahydrocyclohepta[*e*]indene-8-carboxylate (**9**):** Derived from methyl 3-((*tert*-butyldimethylsilyl)oxy)-2-diazobut-3-enoate (**4**) (46.7 mg, 0.18 mmol, 3.0 equiv.) and diene (**S**)-**7** (23.7 mg, 0.06 mmol, 1.0 equiv.) with Rh<sub>2</sub>(*S*-PTAD)<sub>4</sub> (1.9 mg, 2 mol %) at 0 °C, and purified by flash chromatography (10:1 pentane/Et<sub>2</sub>O, R<sub>f</sub> = 0.42) to give product **9** (28.4 mg, 76% yield) as a colorless oil. <sup>1</sup>H NMR (400 MHz, CDCl<sub>3</sub>):

$\delta$  6.13–6.19 (m, 1H), 4.66 (d,  $J = 6.7$  Hz, 1H), 4.55 (d,  $J = 6.7$  Hz, 1H), 4.03–4.10 (m, 1H), 3.67 (s, 3H), 3.56 (d,  $J = 5.5$  Hz, 1H), 3.37 (s, 3H), 2.91–3.12 (m, 3H), 2.47–2.52 (m, 1H), 1.97–2.10 (m, 2H), 1.50–1.88 (m, 5H), 1.16 (s, 3H), 0.98–1.12 (m, 22H), 0.95 (s, 9H), 0.17 (s, 3H), 0.15 (s, 3H);  $^{13}\text{C}$  NMR (100 MHz,  $\text{CDCl}_3$ ):  $\delta$  167.2, 161.6, 140.1, 120.4, 113.7, 95.1, 85.9, 70.1, 55.5, 50.9, 49.7, 46.1, 42.9, 39.4, 35.0, 28.5, 25.7, 24.3, 23.5, 19.1, 18.5, 18.12, 18.08, 12.4, -4.11, -4.14; IR (neat): 2943, 2865, 1714, 1694, 1463, 1252, 1220, 1189, 1147, 1098, 1034, 881, 830, 781  $\text{cm}^{-1}$ ; HRMS (APCI) calc. for  $\text{C}_{34}\text{H}_{63}\text{O}_6\text{Si}_2$  ( $\text{M}+\text{H}$ ) $^+$  623.4163 found 623.4164;  $[\alpha]_D^{25}$  40.3 ( $c = 1.71$ ,  $\text{CHCl}_3$ ).

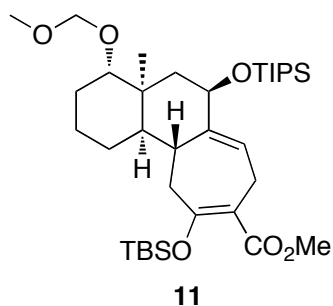

**(4*S*,4*aS*,6*R*,11*aR*,11*bR*)-methyl 10-((*tert*-butyldimethylsilyl)oxy)-4-(methoxymethoxy)-4a-methyl-6-((triisopropylsilyl)oxy)-2,3,4,4*a*,5,6,8,11,11*a*,11*b*-decahydro-1*H*-cyclohepta[*a*]naphthalene-9-carboxylate (11):** Derived from methyl 3-((*tert*-butyldimethylsilyl)oxy)-2-diazobut-3-enoate (**4**) (46.7 mg, 0.18 mmol, 3.0 equiv.) and diene (**S**)-**10** (24.5 mg, 0.06 mmol, 1.0 equiv.) with  $\text{Rh}_2(\text{R-PTAD})_4$  (1.9 mg, 2 mol %) at room temperature, and purified by flash chromatography (10:1 pentane/ $\text{Et}_2\text{O}$ ,  $R_f = 0.41$ ) to give product **11** (29.5 mg, 77% yield) as a colorless oil.  $^1\text{H}$  NMR (600 MHz,  $\text{CDCl}_3$ ):  $\delta$  5.68 (t,  $J = 6.2$  Hz, 1H), 4.84 (d,  $J = 6.2$  Hz, 1H), 4.63 (d,  $J = 6.2$  Hz, 1H), 4.27 (dd,  $J = 11.4, 5.2$  Hz, 1H), 4.17 (t,  $J = 3.3$  Hz, 1H), 3.67 (s, 3H), 3.33 (s, 3H), 2.92–3.02 (m, 3H), 2.63–2.68 (m, 1H), 2.42 (dd,  $J = 13.8, 8.6$  Hz, 1H), 2.29 (dd,  $J = 15.2, 3.3$  Hz, 1H), 1.93–1.98 (m, 1H), 1.78–1.83 (m, 1H), 1.50–1.62 (m, 4H), 1.36–1.43 (m, 1H), 1.15 (dd,  $J = 14.3, 3.8$  Hz, 1H), 1.00–1.10 (m, 21H), 0.952 (s, 3H), 0.949 (s, 9H), 0.15 (s, 3H), 0.14 (s, 3H);  $^{13}\text{C}$  NMR (150 MHz,  $\text{CDCl}_3$ ):  $\delta$  167.6, 161.6, 144.8, 121.2, 113.4, 97.8, 80.0, 76.9, 55.0, 51.0, 49.4, 43.5, 38.8, 36.8, 30.2, 29.7, 25.7, 25.6, 24.9, 23.0, 22.0, 19.5, 18.3, 18.1, 12.5, -3.8, -4.0; IR (neat): 2934, 2864, 1719, 1691, 1463, 1253, 1212, 1193, 1146, 1045, 828  $\text{cm}^{-1}$ ; HRMS (ESI) calc. for  $\text{C}_{35}\text{H}_{64}\text{O}_6\text{NaSi}_2$  ( $\text{M}+\text{Na}$ ) $^+$  659.4134 found 659.4131;  $[\alpha]_D^{25}$  -48.1 ( $c = 0.71$ ,  $\text{CHCl}_3$ ).



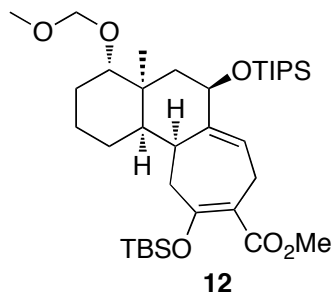

**(4*S*,4*aS*,6*R*,11*aS*,11*bR*)-methyl 10-((*tert*-butyldimethylsilyl)oxy)-4-(methoxymethoxy)-4*a*-methyl-6-((triisopropylsilyl)oxy)-2,3,4,4*a*,5,6,8,11,11*a*,11*b*-decahydro-1*H*-cyclohepta[*a*]naphthalene-9-carboxylate (**12**):** Derived from methyl 3-((*tert*-butyldimethylsilyl)oxy)-2-diazobut-3-enoate (**4**) (46.7 mg, 0.18 mmol, 3.0 equiv.) and diene (**S**)-**10** (24.5 mg, 0.06 mmol, 1.0 equiv.) with Rh<sub>2</sub>(*S*-PTAD)<sub>4</sub> (1.9 mg, 2 mol %) at room temperature, and purified by flash chromatography (10:1 pentane/Et<sub>2</sub>O, R<sub>f</sub> = 0.36) to give product **11** (25.2 mg, 66% yield) as a colorless oil. <sup>1</sup>H NMR (600 MHz, CDCl<sub>3</sub>): δ 6.14–6.20 (m, 1H), 4.71 (d, *J* = 6.7 Hz, 1H), 4.59 (d, *J* = 6.7 Hz, 1H), 4.18–4.22 (m, 1H), 3.67 (s, 3H), 3.41 (s, 3H), 3.27 (t, *J* = 13.3 Hz, 1H), 3.22 (s, 1H), 3.05 (dd, *J* = 16.7, 9.5 Hz, 1H), 2.91 (dm, *J* = 16.7 Hz, 1H), 2.63 (d, *J* = 11.4 Hz, 1H), 1.80 (dd, *J* = 13.3, 3.8 Hz, 1H), 1.74 (t, *J* = 11.9 Hz, 1H), 1.51–1.68 (m, 6H), 1.40 (dd, *J* = 12.0, 5.2 Hz, 1H), 1.28–1.34 (m, 1H), 1.17 (s, 3H), 1.01–1.11 (m, 21H), 0.95 (s, 9H), 0.18 (s, 3H), 0.15 (s, 3H); <sup>13</sup>C NMR (150 MHz, CDCl<sub>3</sub>): δ 167.1, 162.2, 140.3, 120.5, 114.0, 95.8, 81.4, 70.3, 55.9, 50.9, 43.7, 41.0, 38.6, 37.9, 35.2, 25.8, 24.9, 24.4, 23.6, 21.7, 19.7, 18.5, 18.2, 18.1, 12.5, -4.05, -4.13; IR (neat): 2934, 2865, 1713, 1694, 1463, 1252, 1202, 1143, 1033, 829 cm<sup>-1</sup>; HRMS (ESI) calc. for C<sub>35</sub>H<sub>64</sub>O<sub>6</sub>NaSi<sub>2</sub> (M+Na)<sup>+</sup> 659.4134 found 659.4132; [α]<sub>D</sub><sup>25</sup> 9.0 (*c* = 0.40, CHCl<sub>3</sub>).

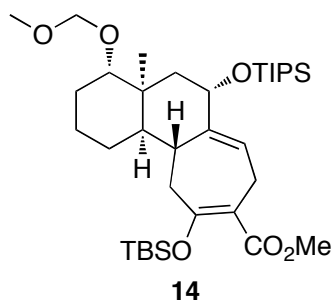

**(4*S*,4*aS*,6*S*,11*aR*,11*bR*)-methyl 10-((*tert*-butyldimethylsilyl)oxy)-4-(methoxymethoxy)-4*a*-methyl-6-((triisopropylsilyl)oxy)-2,3,4,4*a*,5,6,8,11,11*a*,11*b*-decahydro-1*H*-cyclohepta[*a*]naphthalene-9-carboxylate (**14**):** Derived from methyl 3-((*tert*-butyldimethylsilyl)oxy)-2-diazobut-3-enoate (**4**) (46.7 mg, 0.18 mmol, 3.0 equiv.) and diene (**S**)-**13** (24.5 mg, 0.06 mmol, 1.0 equiv.) with Rh<sub>2</sub>(*R*-PTAD)<sub>4</sub> (1.9 mg, 2 mol %) at room

temperature, and purified by flash chromatography (10:1 pentane/Et<sub>2</sub>O, R<sub>f</sub> = 0.44) to give product **14** (24.1 mg, 63% yield) as a colorless oil. <sup>1</sup>H NMR (600 MHz, CDCl<sub>3</sub>): δ 5.95 (t, *J* = 6.2 Hz, 1H), 4.69 (d, *J* = 6.7 Hz, 1H), 4.67 (d, *J* = 6.7 Hz, 1H), 4.09 (dd, *J* = 11.4, 3.2 Hz, 1H), 3.65-3.71 (m, 4H), 3.35 (s, 3H), 3.04 (d, *J* = 6.2 Hz, 2H), 2.68 (d, *J* = 12.4 Hz, 1H), 2.33-2.43 (m, 3H), 1.97-2.01 (m, 1H), 1.75-1.80 (m, 1H), 1.47-1.64 (m, 4H), 1.28-1.38 (m, 1H), 1.01-1.10 (m, 21H), 0.99 (s, 3H), 0.95 (s, 9H), 0.86-0.90 (m, 1H), 0.14 (s, 3H), 0.13 (s, 3H); <sup>13</sup>C NMR (150 MHz, CDCl<sub>3</sub>): δ 167.5, 161.3, 144.7, 116.5, 114.5, 97.7, 79.1, 70.0, 55.2, 51.0, 49.0, 47.2, 39.5, 37.1, 34.3, 29.2, 25.8, 24.7, 22.5, 21.7, 19.3, 18.4, 18.2, 18.1, 12.5, -3.9, -4.3; IR (neat): 2941, 2864, 1714, 1694, 1626, 1212, 1146, 1043, 880, 827, 679 cm<sup>-1</sup>; HRMS (ESI) calc. for C<sub>35</sub>H<sub>64</sub>O<sub>6</sub>NaSi<sub>2</sub> (M+Na)<sup>+</sup> 659.4134 found 659.4132; [α]<sub>D</sub><sup>25</sup> -66.6 (*c* = 0.57, CHCl<sub>3</sub>).

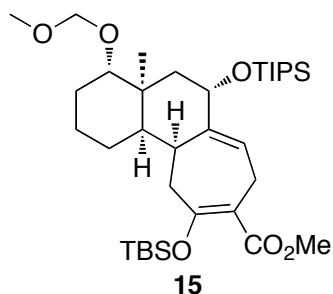

**(4*S*,4*aS*,6*S*,11*aS*,11*bR*)-methyl 10-((*tert*-butyldimethylsilyl)oxy)-4-(methoxymethoxy)-4*a*-methyl-6-((triisopropylsilyl)oxy)-2,3,4,4*a*,5,6,8,11,11*a*,11*b*-decahydro-1*H*-cyclohepta[*a*]naphthalene-9-carboxylate (**15**):** Derived from methyl 3-((*tert*-butyldimethylsilyl)oxy)-2-diazobut-3-enoate (**4**) (46.7 mg, 0.18 mmol, 3.0 equiv.) and diene (**S**)-**13** (24.5 mg, 0.06 mmol, 1.0 equiv.) with Rh<sub>2</sub>(*S*-PTAD)<sub>4</sub> (1.9 mg, 2 mol %) at room temperature, and purified by flash chromatography (10:1 pentane/Et<sub>2</sub>O, R<sub>f</sub> = 0.37) to give product **15** (26.4 mg, 69% yield) as a colorless oil. <sup>1</sup>H NMR (600 MHz, CDCl<sub>3</sub>): δ 5.85 (dd, *J* = 9.1, 2.9 Hz, 1H), 4.70 (d, *J* = 6.7 Hz, 1H), 4.60 (d, *J* = 6.7 Hz, 1H), 4.17 (d, *J* = 2.4 Hz, 1H), 3.65 (s, 3H), 3.41 (s, 3H), 3.25 (t, *J* = 13.3 Hz, 1H), 3.17 (s, 1H), 3.10 (dm, *J* = 13.3 Hz, 1H), 3.00 (dd, *J* = 17.1, 9.1 Hz, 1H), 2.91 (dt, *J* = 17.1, 3.3 Hz, 1H), 1.87 (dd, *J* = 14.0, 4.2 Hz, 1H), 1.80 (dd, *J* = 14.0, 4.2 Hz, 1H), 1.50-1.68 (m, 6H), 1.39 (s, 3H), 1.33 (d, *J* = 13.8 Hz, 1H), 1.11-1.18 (m, 1H), 0.96-1.05 (m, 21H), 0.96 (s, 9H), 0.20 (s, 6H); <sup>13</sup>C NMR (150 MHz, CDCl<sub>3</sub>): δ 167.3, 162.7, 140.7, 126.8, 112.1, 96.1, 81.5, 75.8, 55.8, 50.8, 44.3, 38.3, 37.79, 37.76, 32.0, 25.5, 25.3, 25.0, 24.7, 21.6, 19.6, 18.23, 18.15, 12.2, -3.6, -3.7; IR (neat): 2941, 2864, 1716, 1689, 1621, 1462, 1372, 1226, 1202, 1148, 1036, 915, 839, 780 cm<sup>-1</sup>; HRMS (ESI) calc. for C<sub>35</sub>H<sub>64</sub>O<sub>6</sub>NaSi<sub>2</sub> (M+Na)<sup>+</sup> 659.4134 found 659.4137; [α]<sub>D</sub><sup>25</sup> 20.8 (*c* = 1.32, CHCl<sub>3</sub>).

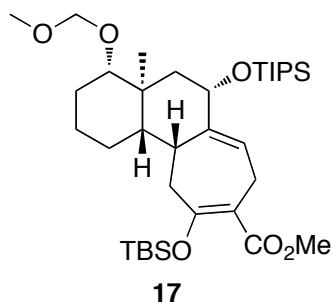

**(4*S*,4*aS*,6*S*,11*aR*,11*bS*)-methyl 10-((*tert*-butyldimethylsilyl)oxy)-4-(methoxymethoxy)-4*a*-methyl-6-((triisopropylsilyl)oxy)-2,3,4,4*a*,5,6,8,11,11*a*,11*b*-decahydro-1*H*-cyclohepta[*a*]naphthalene-9-carboxylate (**17**):** Derived from methyl 3-((*tert*-butyldimethylsilyl)oxy)-2-diazobut-3-enoate (**4**) (46.7 mg, 0.18 mmol, 3.0 equiv.) and diene (*S*)-**16** (24.5 mg, 0.06 mmol, 1.0 equiv.) with Rh<sub>2</sub>(*R*-PTAD)<sub>4</sub> (1.9 mg, 2 mol %) at room temperature, and purified by flash chromatography (10:1 pentane/Et<sub>2</sub>O, R<sub>f</sub> = 0.36) to give product **17** (21.0 mg, 55% yield) as a colorless oil. <sup>1</sup>H NMR (600 MHz, CDCl<sub>3</sub>): δ 5.89-5.91 (m, 1H), 4.72 (d, *J* = 7.1 Hz, 1H), 4.55 (d, *J* = 7.1 Hz, 1H), 4.38 (t, *J* = 8.1 Hz, 1H), 3.68 (s, 3H), 3.37 (s, 3H), 3.20 (dd, *J* = 18.1, 8.1 Hz, 1H), 3.12 (dd, *J* = 11.0, 4.3 Hz, 1H), 3.05 (dm, *J* = 18.1 Hz, 1H), 2.73-2.83 (m, 2H), 2.24 (d, *J* = 12.9 Hz, 1H), 1.98 (dd, *J* = 13.3, 7.1 Hz, 1H), 1.75-1.82 (m, 3H), 1.56 (dd, *J* = 13.2, 7.8 Hz, 1H), 1.18-1.40 (m, 4H), 1.01-1.11 (m, 21H), 0.99 (s, 3H), 0.94 (s, 9H), 0.16 (s, 3H), 0.15 (s, 3H); <sup>13</sup>C NMR (150 MHz, CDCl<sub>3</sub>): δ 168.5, 162.0, 143.4, 118.7, 111.7, 95.2, 85.8, 69.5, 55.6, 51.1, 48.3, 42.3, 38.8, 37.5, 36.9, 26.9, 25.8, 25.4, 25.1, 24.1, 18.4, 18.15, 18.14, 16.6, 12.3, -3.8, -3.9; IR (neat): 2941, 2864, 1717, 1695, 1630, 1366, 1212, 1042, 878, 839 cm<sup>-1</sup>; HRMS (ESI) calc. for C<sub>35</sub>H<sub>64</sub>O<sub>6</sub>NaSi<sub>2</sub> (M+Na)<sup>+</sup> 659.4134 found 659.4137; [α]<sub>D</sub><sup>25</sup> 36.5 (*c* = 0.66, CHCl<sub>3</sub>).

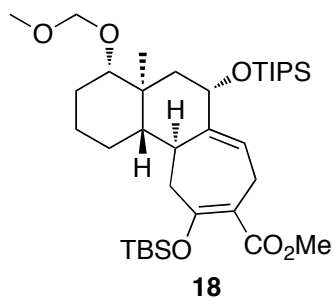

**(4*S*,4*aS*,6*S*,11*aS*,11*bS*)-methyl 10-((*tert*-butyldimethylsilyl)oxy)-4-(methoxymethoxy)-4*a*-methyl-6-((triisopropylsilyl)oxy)-2,3,4,4*a*,5,6,8,11,11*a*,11*b*-decahydro-1*H*-cyclohepta[*a*]naphthalene-9-carboxylate (**18**):** Derived from methyl 3-((*tert*-butyldimethylsilyl)oxy)-2-diazobut-3-enoate (**4**) (46.7 mg, 0.18 mmol, 3.0 equiv.) and diene (*S*)-**S-19**

**16** (24.5 mg, 0.06 mmol, 1.0 equiv.) with  $\text{Rh}_2(\text{S-PTAD})_4$  (1.9 mg, 2 mol %) at room temperature, and purified by flash chromatography (10:1 pentane/ $\text{Et}_2\text{O}$ ,  $R_f = 0.28$ ) to give product **15** (31.0 mg, 81% yield) as a colorless oil.  $^1\text{H}$  NMR (600 MHz,  $\text{CDCl}_3$ ):  $\delta$  5.71 (t,  $J = 6.2$  Hz, 1H), 4.69 (d,  $J = 6.7$  Hz, 1H), 4.54 (d,  $J = 6.7$  Hz, 1H), 4.21 (t,  $J = 3.8$  Hz, 1H), 3.66 (s, 3H), 3.35 (s, 3H), 3.06 (dd,  $J = 11.4, 4.3$  Hz, 1H), 2.99 (dd,  $J = 17.1, 7.1$  Hz, 1H), 2.93 (ddd,  $J = 17.1, 5.7, 1.4$  Hz, 1H), 2.69 (q,  $J = 7.6$  Hz, 1H), 2.50 (d,  $J = 6.7$  Hz, 2H), 2.15 (dd,  $J = 13.8, 2.9$  Hz, 1H), 1.66-1.80 (m, 3H), 1.45-1.52 (m, 1H), 1.37 (dd,  $J = 13.8, 4.2$  Hz, 1H), 1.16-1.27 (m, 2H), 1.15 (s, 3H), 1.12-1.17 (m, 1H), 0.98-1.05 (m, 21H), 0.95 (s, 9H), 0.16 (s, 3H), 0.14 (s, 3H);  $^{13}\text{C}$  NMR (150 MHz,  $\text{CDCl}_3$ ):  $\delta$  167.7, 161.4, 144.6, 122.1, 113.2, 95.6, 85.8, 75.6, 55.5, 50.9, 49.6, 46.1, 39.4, 36.9, 32.8, 26.3, 25.6, 25.5, 24.7, 23.9, 22.9, 18.21, 18.16, 14.0, 12.2, -3.6, -3.9; IR (neat): 2942, 2864, 1718, 1690, 1626, 1372, 1206, 1141, 1040, 920, 829, 780  $\text{cm}^{-1}$ ; HRMS (ESI) calc. for  $\text{C}_{35}\text{H}_{64}\text{O}_6\text{NaSi}_2$  ( $\text{M}+\text{Na}$ ) $^+$  659.4134 found 659.4135;  $[\alpha]_D^{25}$  15.1 ( $c = 0.85$ ,  $\text{CHCl}_3$ ).

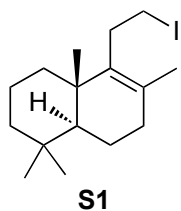

**(4a*S*,8a*S*)-8-(2-iodoethyl)-4,4,7,8a-tetramethyl-1,2,3,4,4a,5,6,8a-octahydro-naphthalene**

**(S1)**: Prepared *via* a modified literature procedure.<sup>2</sup> To a solution of (+)-sclareolide (5.0 g, 20 mmol, 1.0 equiv.) in dried THF (50 mL) was added  $\text{LiAlH}_4$  (20 mL of 1M solution in THF, 20 mmol, 1.0 equiv.) at 0 °C slowly. The solution was warmed up to room temperature and stirred for additional 3h. The mixture was quenched by saturated  $\text{NH}_4\text{Cl}$  solution and extracted by  $\text{Et}_2\text{O}$  (200 mL  $\times$  4). The organic layers were combined and dried ( $\text{MgSO}_4$ ), concentrated under reduced pressure. The residue was then dissolved in 50 mL DCM and added to 50 mL DCM solution containing  $\text{I}_2$  (5.6 g, 22.0 mmol, 1.1equiv.) and  $\text{PPh}_3$  (5.8 g, 22.0 mmol, 1.1 equiv.) at 0 °C. The solution was warmed up to room temperature and stirred for additional 4h. Saturated  $\text{NaHSO}_3$  aqueous solution (50 mL) was added and the mixture was stirred for 30 mins. The mixture was extracted by pentane (100 mL  $\times$  4) and dried ( $\text{MgSO}_4$ ), concentrated. The residue was then purified by flash chromatography (pentane,  $R_f = 0.76$ ) on silica gel to give product as a colorless solid with trace amount of isomer. The solid was recrystallized from  $\text{EtOH}$  to afford the

<sup>2</sup> Alvarez-Manzaneda, E.; Chahboun, R.; Cabrera, E.; Alvarez, E.; Haidour, A.; Ramos, J. M.; Alvarez-Manzaneda, R.; Hmamouchi, M.; Es-Samti, H. *Chem. Commun.*, **2009**, 592.

pure product **S1** (5.55 g, 80% yield) as white crystals.  $^1\text{H}$  NMR (400 MHz,  $\text{CDCl}_3$ ):  $\delta$  3.03–3.12 (m, 2H), 2.67 (td,  $J = 13.3, 5.1$  Hz, 1H), 2.49 (td,  $J = 13.3, 5.1$  Hz, 1H), 1.90–2.01 (m, 2H), 1.78–1.81 (m, 1H), 1.59–1.66 (m, 2H), 1.56 (s, 3H), 1.47–1.52 (m, 1H), 1.34–1.42 (m, 2H), 1.06–1.16 (m, 3H), 0.92 (s, 3H), 0.88 (s, 3H), 0.83 (s, 3H);  $^{13}\text{C}$  NMR (100 MHz,  $\text{CDCl}_3$ ):  $\delta$  141.0, 129.1, 51.8, 41.7, 38.6, 37.1, 34.2, 33.6, 33.29, 33.26, 21.6, 20.0, 19.8, 19.0, 18.9, 5.2; IR (neat): 2924, 2865, 1458, 1387, 1162, 907, 733  $\text{cm}^{-1}$ ; M.p. 75–77  $^\circ\text{C}$ ; HRMS (APCI) calc. for  $\text{C}_{16}\text{H}_{28}^{127}\text{I}$  ( $\text{M}+\text{H}$ ) $^+$  347.1230 found 347.1233;  $[\alpha]_D^{25}$  28.3 ( $c = 1.16$ ,  $\text{CHCl}_3$ ).

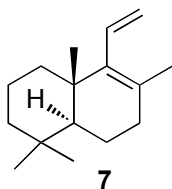

**(4aS,8aS)-4,4,7,8a-tetramethyl-8-vinyl-1,2,3,4,4a,5,6,8a-octahydronaphthalene (7)**: To a solution of iodine **S1** (2.08g, 6.0 mmol, 1.0 equiv.) in THF (5 mL) was added a solution of  $\text{KO}t\text{-Bu}$  (1.35g, 12.0 mmol 2.0 equiv.) in THF (5 mL) slowly. The mixture was stirred for 6 h at room temperature and then quenched by saturated brine solution. The mixture was extracted by pentane (100 mL  $\times$  3) and dried ( $\text{MgSO}_4$ ), concentrated under reduced pressure to afford the diene **7** (1.28 g, 98% yield) as colorless oil without further purification.  $^1\text{H}$  NMR (400 MHz,  $\text{CDCl}_3$ ):  $\delta$  6.08–6.16 (m, 1H), 5.23 (dd,  $J = 11.0, 2.7$  Hz, 1H), 4.90 (dd,  $J = 17.7, 2.7$  Hz, 1H), 2.03–2.10 (m, 2H), 1.63–1.71 (m, 5H), 1.37–1.61 (m, 4H), 1.06–1.19 (m, 3H), 1.00 (s, 3H), 0.89 (s, 3H), 0.84 (s, 3H);  $^{13}\text{C}$  NMR (100 MHz,  $\text{CDCl}_3$ ):  $\delta$  142.0, 135.2, 126.8, 118.3, 51.2, 41.8, 38.1, 37.6, 33.5, 33.3, 33.2, 21.6, 21.1, 20.0, 19.0, 18.9; IR (neat): 2923, 2865, 1457, 1374, 1006, 914  $\text{cm}^{-1}$ ; HRMS (APCI) calc. for  $\text{C}_{16}\text{H}_{27}$  ( $\text{M}+\text{H}$ ) $^+$  219.2107 found 219.2109;  $[\alpha]_D^{25}$  106.0 ( $c = 1.15$ ,  $\text{CHCl}_3$ ).

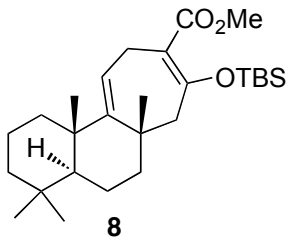

**(4aS,6aS,11bS)-methyl 8-((tert-butyldimethylsilyl)oxy)-4,4,6a,11b-tetramethyl-2,3,4,4a,5,6,6a,7,10,11b-decahydro-1H-cyclohepta[a]naphthalene-9-carboxylate (8)**: A solution of methyl 3-((tert-butyldimethylsilyl)oxy)-2-diazobut-3-enoate (**4**) (2.56 g, 10.0 mmol, 5.0 equiv.)

in dried hexane (6 mL) was added dropwise to a stirred solution of diene **7** (437 mg, 2.0 mmol, 1.0 equiv.) and  $\text{Rh}_2(\text{R-PTAD})_4$  (63 mg, 2 mol %) in refluxed hexane (6 mL) over 3 h by syringe pump under argon atmosphere. The solution was cooled to room temperature and concentrated under reduced pressure. The residue was then purified by flash chromatography (20:1 pentane/ $\text{Et}_2\text{O}$ ,  $R_f = 0.60$ ) on silica gel to give products (0.581 g, 65% combined yield) as a mixture of two diastereomers with 6/1 ratio favoring the product **8**. The mixture was carefully recrystallized from EtOH and the mother liquid was subsequently purified on silica gel impregnated with 5%  $\text{AgNO}_3$  and followed by recrystallizing from EtOH again to afford the pure product **8** (0.43 g, 47% yield) as a white powder.  $^1\text{H}$  NMR (400 MHz,  $\text{CDCl}_3$ ):  $\delta$  5.48 (dd,  $J = 8.5, 3.4$  Hz, 1H), 3.68 (s, 3H), 3.16 (dd,  $J = 18.3, 8.5$  Hz, 1H), 3.05 (dd,  $J = 18.3, 3.4$  Hz, 1H), 2.88 (d,  $J = 13.1$  Hz, 1H), 1.78 (d,  $J = 13.4$  Hz, 1H), 1.32-1.69 (m, 8H), 1.27 (s, 3H), 1.07-1.25 (m, 3H), 1.05 (s, 3H), 0.95 (s, 9H), 0.85 (s, 3H), 0.82 (s, 3H), 0.154 (s, 3H), 0.152 (s, 3H);  $^{13}\text{C}$  NMR (150 MHz,  $\text{CDCl}_3$ ):  $\delta$  167.9, 162.7, 155.4, 116.5, 110.4, 54.2, 52.4, 51.0, 44.0, 41.9, 41.1, 39.4, 37.2, 34.0, 33.2, 27.3, 27.1, 25.8, 23.4, 21.6, 19.23, 19.19, 18.3, -3.6, -3.7; IR (neat): 2929, 1690, 1377, 1252, 1212, 1139, 1052, 829, 779, 732  $\text{cm}^{-1}$ ; M.p. 74-76  $^\circ\text{C}$ ; HRMS (APCI) calc. for  $\text{C}_{27}\text{H}_{47}\text{O}_3\text{Si}$  ( $\text{M}+\text{H}$ ) $^+$  447.3289 found 447.3284;  $[\alpha]_D^{25}$  24.5 ( $c = 1.64$ ,  $\text{CHCl}_3$ ).

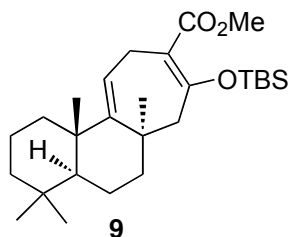

**(4a*S*,6a*R*,11b*S*)-methyl 8-((*tert*-butyldimethylsilyl)oxy)-4,4,6a,11b-tetramethyl-2,3,4,4a,5,6,6a,7,10,11b-decahydro-1*H*-cyclohepta[*a*]naphthalene-9-carboxylate (**9**):** A solution of methyl 3-((*tert*-butyldimethylsilyl)oxy)-2-diazobut-3-enoate (**4**) (153 mg, 0.60 mmol, 3.0 equiv.) in dried hexane (3 mL) was added dropwise to a stirred solution of diene **7** (43.7 mg, 0.2 mmol, 1.0 equiv.) and  $\text{Rh}_2(\text{S-PTAD})_4$  (6.3 mg, 2 mol %) in refluxed hexane (3 mL) over 3 h by syringe pump under argon atmosphere. The solution was cooled to room temperature and concentrated under reduced pressure. The residue was then purified by flash chromatography (20:1 pentane/ $\text{Et}_2\text{O}$ ,  $R_f = 0.60$ ) on silica gel to give products (56.3 mg, 63% combined yield) as a mixture of two diastereomers with 9/1 ratio favoring the product **9**. The residue was carefully purified on silica gel impregnated with 5%  $\text{AgNO}_3$  to afford the pure product **9** as a colorless oil.  $^1\text{H}$  NMR (400 MHz,  $\text{CDCl}_3$ ):  $\delta$  5.40 (t,  $J = 5.6$  Hz, 1H), 3.69 (s, 3H), 3.20 (dd,  $J =$



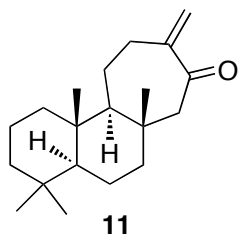

**(4a*S*,6a*S*,11a*S*,11b*S*)-4,4,6a,11b-tetramethyl-9-methylenedodecahydro-1*H*-cyclohepta[*a*]naphthalen-8(11b*H*)-one (11):** To a solution of ester **10** (0.494 g, 1.1 mmol, 1.0 equiv.) in THF (5 mL) was added 3.6 mL of DIBAL-H (1.0 M in THF, 3.6 mmol, 3.3 equiv.) at 0 °C dropwise. The mixture was stirred for 1h and quenched by 1M of NaOH aqueous solution. The solution was extracted by Et<sub>2</sub>O (20 mL × 3) and dried (MgSO<sub>4</sub>), concentrated under reduced pressure. The residue was dissolved in dried benzene (30 mL) containing PPTS (27.6 mg, 0.11 mmol, 0.1 equiv.) and the solution was heated under reflux with Dean Stark apparatus for 3h. The solution was then concentrated and purified by flash chromatography (85/15 pentane/ Et<sub>2</sub>O, R<sub>f</sub> = 0.65) on silica gel to give product **11** (0.203 g, 64% yield) as a white solid <sup>1</sup>H NMR (600 MHz, CDCl<sub>3</sub>): 5.95 (d, *J* = 1.1 Hz, 1H), 5.19 (s, 1H), 2.68 (d, *J* = 3.8 Hz, 1H), 2.66 (d, *J* = 4.8 Hz, 1H), 2.34 (t, *J* = 13.1 Hz, 1H), 2.15 (d, *J* = 12.4 Hz, 1H), 2.09 (dd, *J* = 14.3, 7.6 Hz, 1H), 1.80 (dm, *J* = 12.9 Hz, 1H), 1.50-1.64 (m, 3H), 1.30-1.46 (m, 5H), 1.08-1.20 (m, 2H), 0.88 (s, 3H), 0.86 (s, 3H), 0.83-0.90 (m, 2H), 0.81 (s, 3H), 0.80 (s, 3H); <sup>13</sup>C NMR (150 MHz, CDCl<sub>3</sub>): δ 202.1, 147.3, 121.5, 63.5, 60.6, 56.5, 44.6, 41.8, 40.2, 38.8, 37.5, 34.4, 33.44, 33.40, 25.2, 21.5, 19.9, 18.9, 18.8, 16.0; IR (neat): 2934, 2851, 1683, 1611, 1455, 1386, 1288, 1198, 1092, 1037, 942, 899 cm<sup>-1</sup>; M.p. 94-96 °C; HRMS (APCI) calc. for C<sub>22</sub>H<sub>33</sub>O (M+H)<sup>+</sup> 289.2526 found 289.2526; [α]<sub>D</sub><sup>25</sup> 135.3 (*c* = 0.80, CHCl<sub>3</sub>).

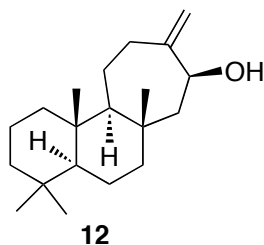

**(4a*S*,6a*S*,8*S*,11a*S*,11b*S*)-4,4,6a,11b-tetramethyl-9-methylenetetradecahydro-1*H*-cyclohepta[*a*]naphthalen-8-ol (12):** To a solution of conjugated ketone **11** (28.9 mg, 0.1 mmol, 1.0 equiv.) in THF (2 mL) was added 0.2 mL of DIBAL-H (1.0 M in THF, 0.2 mmol, 2.0 equiv.) at -78 °C dropwise. The mixture was warmed up to -30 °C over 1h and quenched by 1M of HCl aqueous solution. The mixture was extracted by Et<sub>2</sub>O (10 mL × 3) and dried (MgSO<sub>4</sub>), concentrated under reduced pressure to afford the allylic alcohol **12** (27.1 mg, 95% yield) as a



white powder without further purification.  $^1\text{H}$  NMR (400 MHz,  $\text{CDCl}_3$ ):  $\delta$  5.01 (t,  $J = 1.5$  Hz, 1H), 4.83 (s, 1H), 4.33-4.37 (m, 1H), 2.50 (ddd,  $J = 13.4, 5.5, 3.4$  Hz, 1H), 1.92-2.01 (m, 1H), 1.70-1.82 (m, 2H), 1.65 (d,  $J = 5.2$  Hz, 2H), 1.31-1.62 (m, 10H), 1.11 (td,  $J = 13.2, 4.4$  Hz, 1H), 0.98 (s, 3H), 0.90 (dd,  $J = 10.4, 2.4$  Hz, 1H), 0.85 (s, 3H), 0.80 (s, 3H), 0.79 (s, 3H), 0.74-0.82 (m, 1H);  $^{13}\text{C}$  NMR (100 MHz,  $\text{CDCl}_3$ ):  $\delta$  154.7, 108.2, 71.9, 59.3, 56.7, 53.0, 44.1, 42.0, 40.0, 38.6, 37.1, 34.9, 33.41, 33.38, 24.6, 22.1, 21.5, 18.8, 18.6, 16.2; IR (neat): 3396(br), 2920, 2843, 1462, 1387, 1039, 1012, 899, 757  $\text{cm}^{-1}$ ; M.p. 63-65  $^\circ\text{C}$ ; HRMS (APCI) calc. for  $\text{C}_{20}\text{H}_{35}\text{O}$  ( $\text{M}+\text{H}$ ) $^+$  291.2682 found 291.2684;  $[\alpha]_{\text{D}}^{25}$  10.5 ( $c = 0.95$ ,  $\text{CHCl}_3$ ).

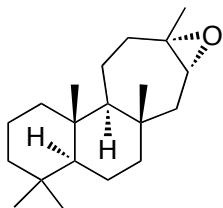

barekoxide (**1**)

**Barekoxide (1):** A DCE solution (4 mL) containing alcohol **12** (29.0 mg, 0.1 mmol, 1.0 equiv.),  $\text{B}(\text{C}_6\text{F}_5)_3$  (4.1 mg, 0.008 mmol, 0.08 equiv.),  $\text{HSiEt}_3$  (46.4 mg, 0.4 mmol, 4.0 equiv.) was heated under reflux for 14 h. The solution was concentrated and passed through a small pipet column on silica gel with pentane. The solvent was removed under reduced pressure and the residue was dissolved in DCM (5 mL). After cooling down to 0  $^\circ\text{C}$ , a DCM solution (5 mL) containing *m*-CPBA (50 mg, 0.2 mmol, 2.0 equiv.) was added to the olefin solution and the mixture was stirred for 1h. The solvent was quenched with saturated  $\text{Na}_2\text{S}_2\text{O}_3$  aqueous solution. The mixture was extracted with  $\text{Et}_2\text{O}$  (10 mL  $\times$  3) and dried ( $\text{MgSO}_4$ ), concentrated under reduced pressure. The residue was purified by flash chromatography (20/1 pentane/ $\text{Et}_2\text{O}$ ,  $R_f = 0.26$ ) on silica gel to afford barekoxide (**1**) (16.4 mg, 58% yield) as a white powder.  $^1\text{H}$  NMR (400 MHz,  $\text{C}_6\text{D}_6$ ):  $\delta$  2.59 (t,  $J = 7.3$  Hz, 1H), 1.88 (dd,  $J = 13.7, 7.6$  Hz, 1H), 1.70 (dd,  $J = 14.0, 6.4$  Hz, 1H), 1.22-1.60 (m, 10H), 1.21 (s, 3H), 0.95-1.19 (m, 3H), 0.85 (s, 3H), 0.83 (s, 3H), 0.80 (s, 3H), 0.72 (s, 3H), 0.47-0.61 (m, 3H);  $^{13}\text{C}$  NMR (100 MHz,  $\text{C}_6\text{D}_6$ ):  $\delta$  64.5, 60.0, 59.9, 56.2, 48.0, 44.2, 42.1, 40.2, 38.9, 37.7, 36.6, 33.6 (2C), 22.7, 21.8, 20.4, 19.8, 19.1, 18.8, 16.2; IR (neat): 2931, 2919, 2845, 1464, 1387, 873  $\text{cm}^{-1}$ ; M.p. 136-137  $^\circ\text{C}$  {lit. M.p. 140  $^\circ\text{C}$ }<sup>6c</sup>; HRMS (APCI) calc. for  $\text{C}_{20}\text{H}_{35}\text{O}$  ( $\text{M}+\text{H}$ ) $^+$  291.2682 found 291.2682;  $[\alpha]_{\text{D}}^{25}$  1.73 ( $c = 0.59$ ,  $\text{CHCl}_3$ ) {lit.  $[\alpha]_{\text{D}}^{22}$  5.2 ( $c = 0.256$ ,  $\text{CHCl}_3$ )}<sup>6c</sup>.

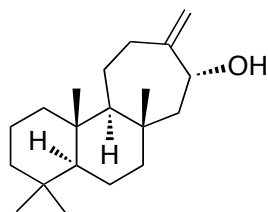

barekol (**2**)

**Barekol (2):** To a solution of barekoxide (**1**) (25 mg, 0.09 mmol, 1.0 equiv.) in dried DMF (3 mL) was added 2 drop of HClO<sub>4</sub> (70% aqueous solution) and the solution was stirred at room temperature for 16h. The solution was quenched by saturated NaHCO<sub>3</sub> solution. The mixture was extracted by Et<sub>2</sub>O (10 mL × 3) and dried (MgSO<sub>4</sub>), concentrated under reduced pressure. The residue was purified by flash chromatography (85/15 pentane/ Et<sub>2</sub>O, R<sub>f</sub> = 0.24) on silica gel to afford the the barekol (**2**) (18.3 mg, 73% yield) as a white powder. Careful recrystallization from pentane afforded some crystals for X-ray crystallographic analysis. <sup>1</sup>H NMR (600 MHz, CDCl<sub>3</sub>): δ 5.03 (s, 1H), 4.88 (s, 1H), 4.27 (dd, *J* = 11.0, 3.8 Hz, 1H), 2.42-2.47 (m, 1H), 2.15-2.21 (m, 1H), 1.72-1.83 (m, 2H), 1.67 (dd, *J* = 13.3, 4.3 Hz, 1H), 1.51-1.61 (m, 2H), 1.45-1.50 (m, 1H), 1.32-1.44 (m, 5H), 1.19-1.31(m, 2H), 1.12(td, *J* = 13.3, 4.2 Hz, 1H), 0.95 (s, 3H), 0.84-0.87 (m, 1H), 0.85 (s, 3H), 0.77-0.83 (m, 2H), 0.79 (s, 3H), 0.78 (s, 3H); <sup>13</sup>C NMR (150 MHz, CDCl<sub>3</sub>): δ 155.1, 110.5, 70.8, 60.3, 56.4, 55.4, 45.1, 41.9, 39.9, 38.6, 36.0, 33.4 (2C), 33.2, 24.1, 21.6, 20.3, 18.7, 18.6, 15.8; IR (neat): 3312(br), 2922, 2847, 1462, 1387, 1055, 1009, 897, 734 cm<sup>-1</sup>; HRMS (APCI) calc. for C<sub>20</sub>H<sub>35</sub>O (M+H)<sup>+</sup> 291.2682 found 291.2684; [α]<sub>D</sub><sup>25</sup> -48.7 (*c* = 0.76, CHCl<sub>3</sub>) {lit. [α]<sub>D</sub><sup>22</sup> -29 (*c* 1.0, CHCl<sub>3</sub>)}<sup>6b</sup>.

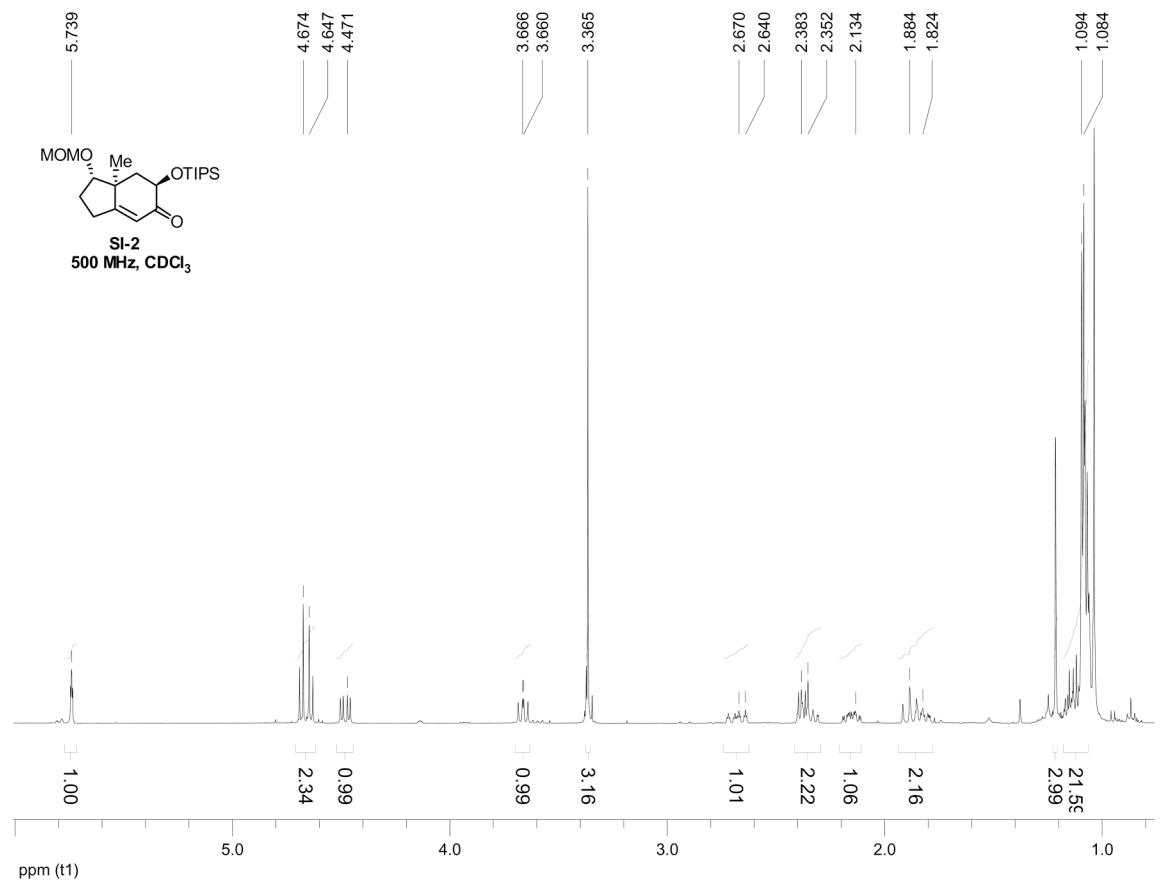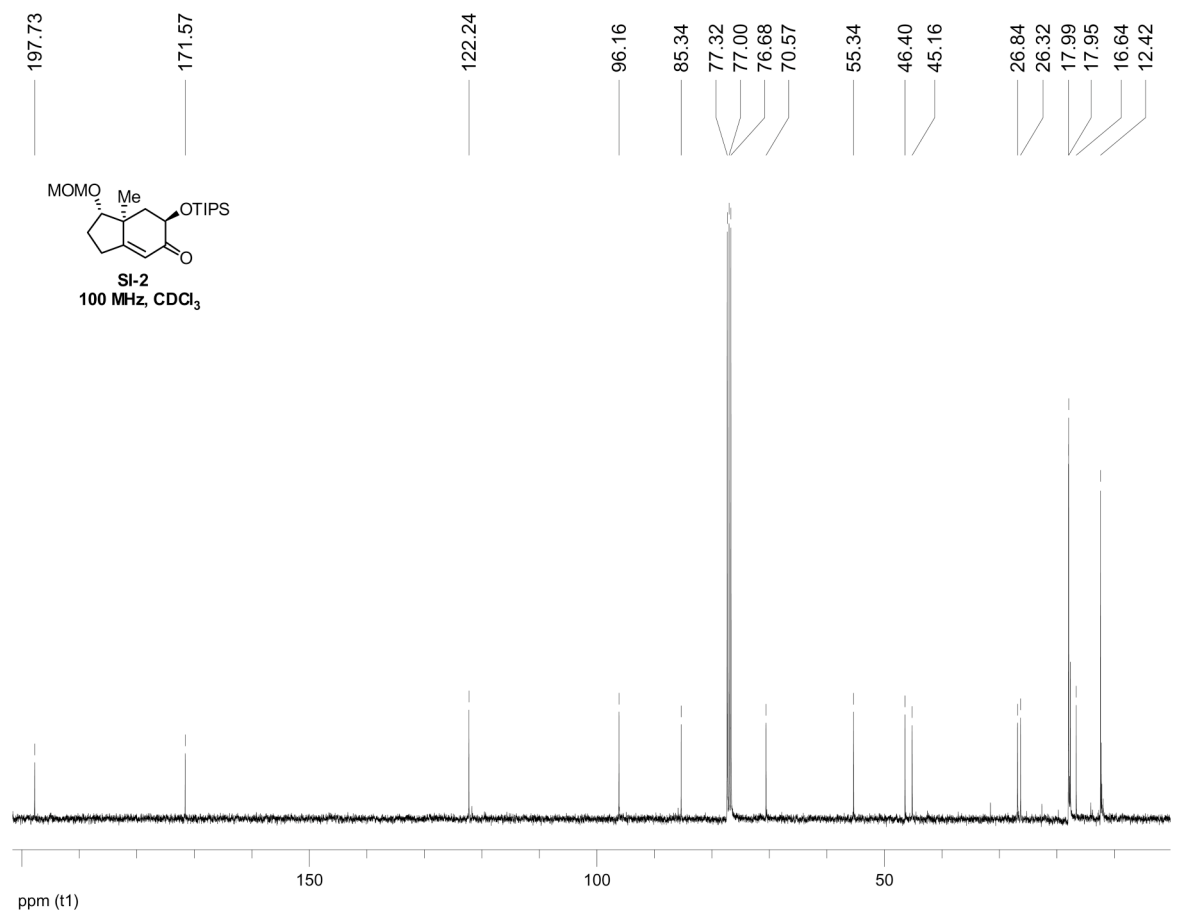

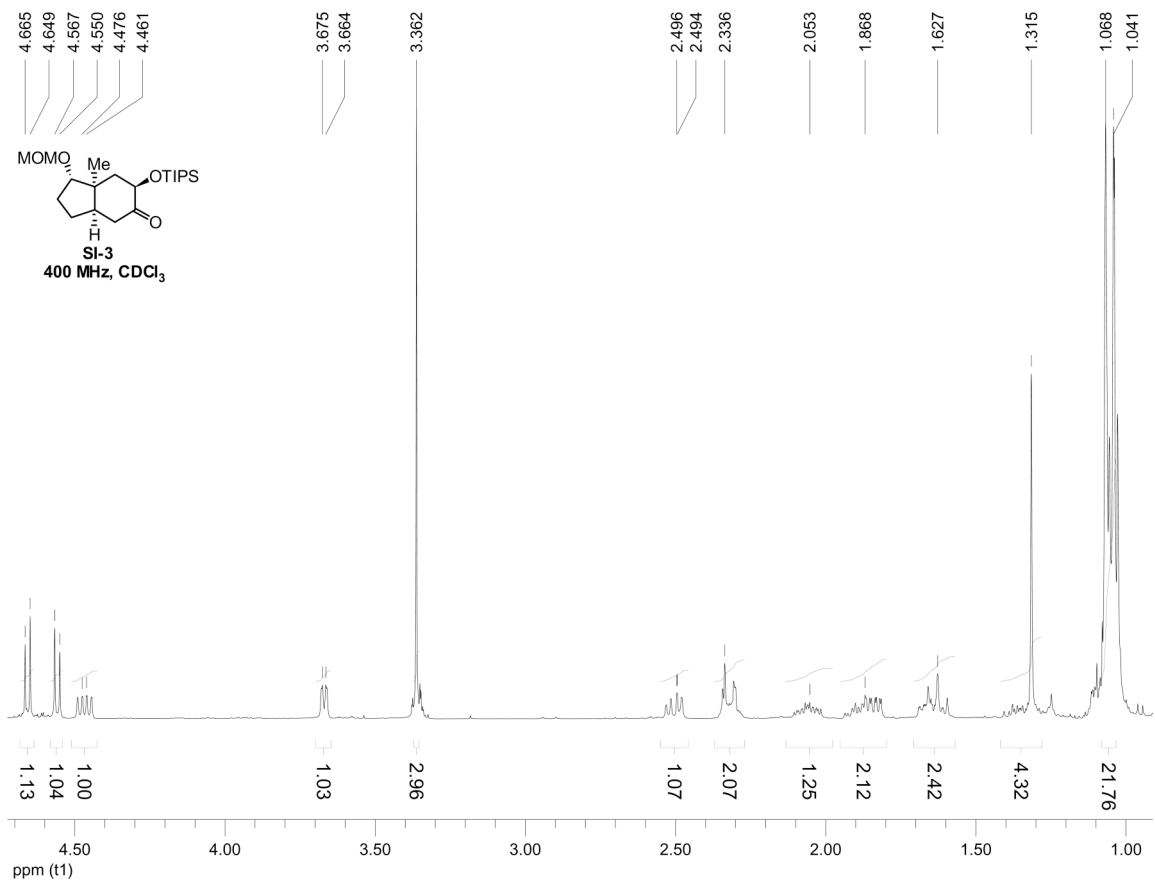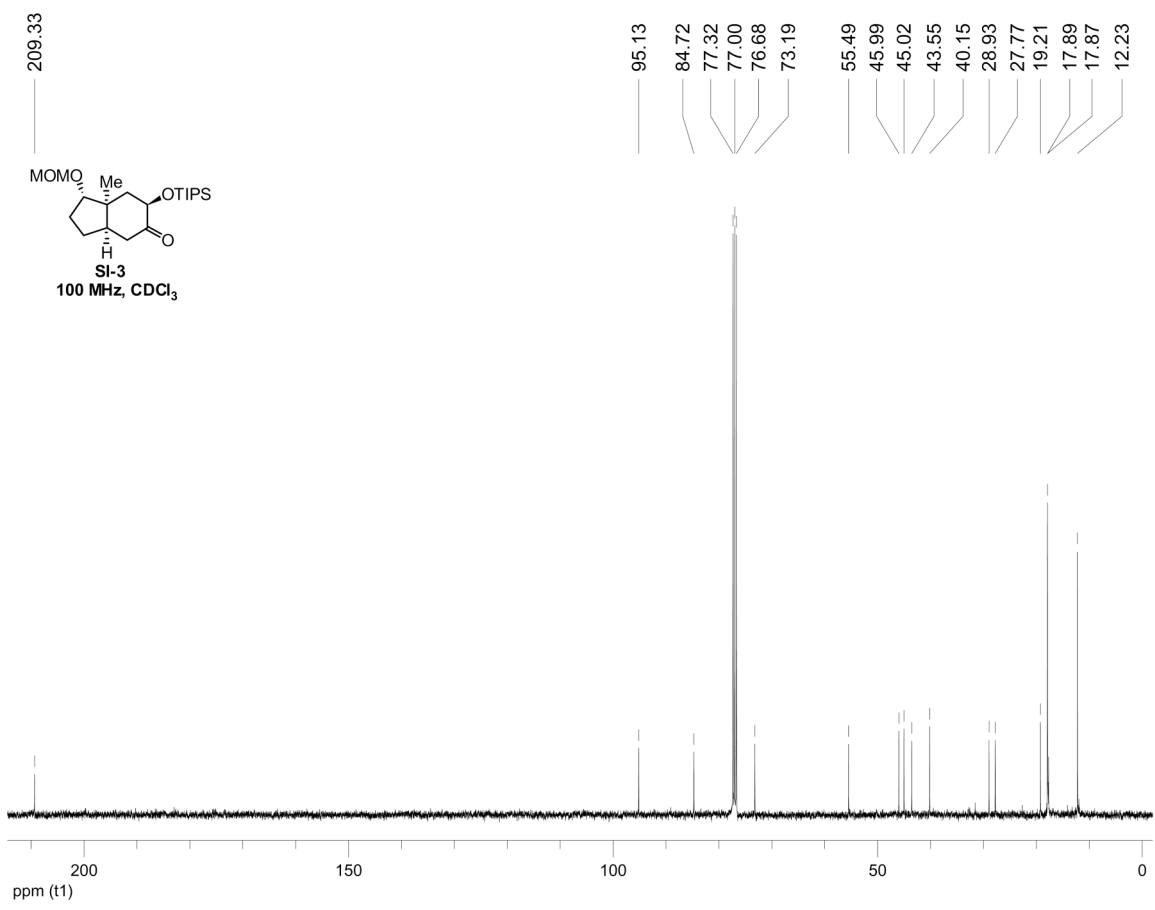

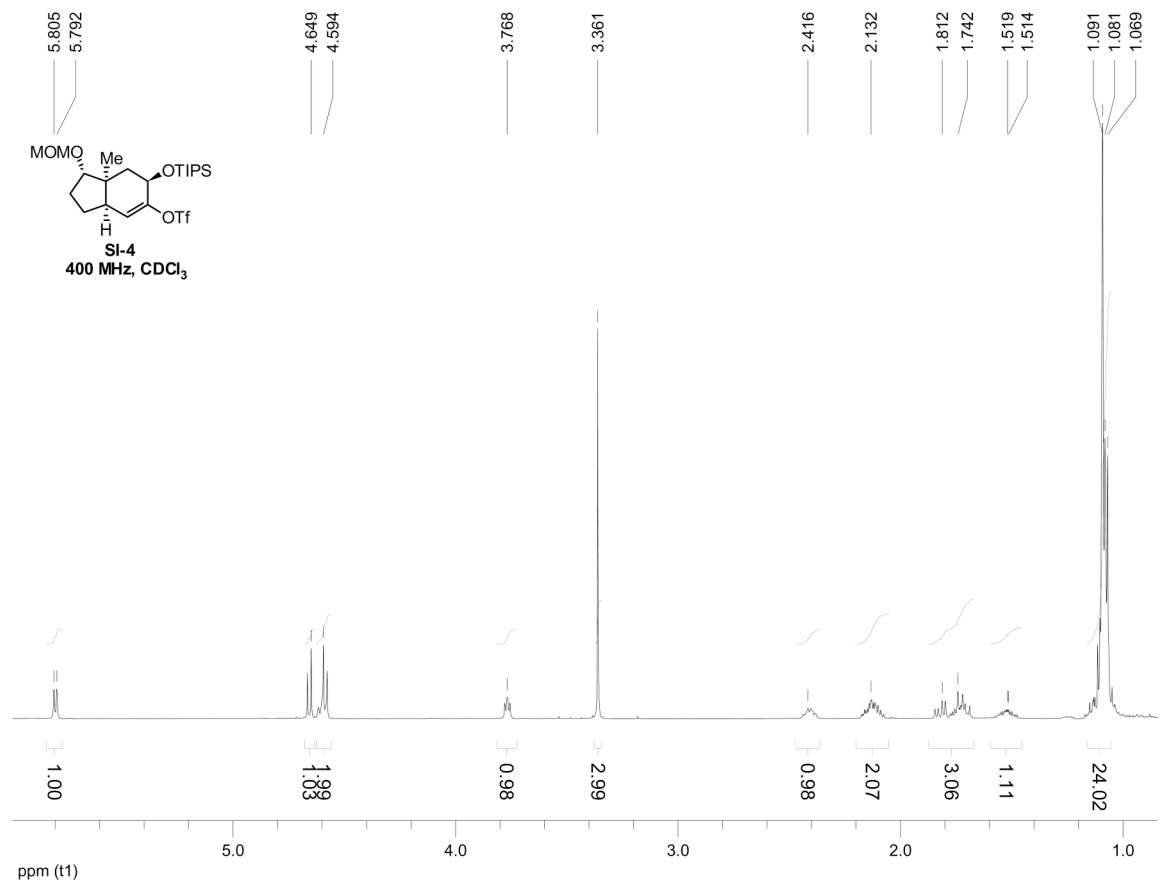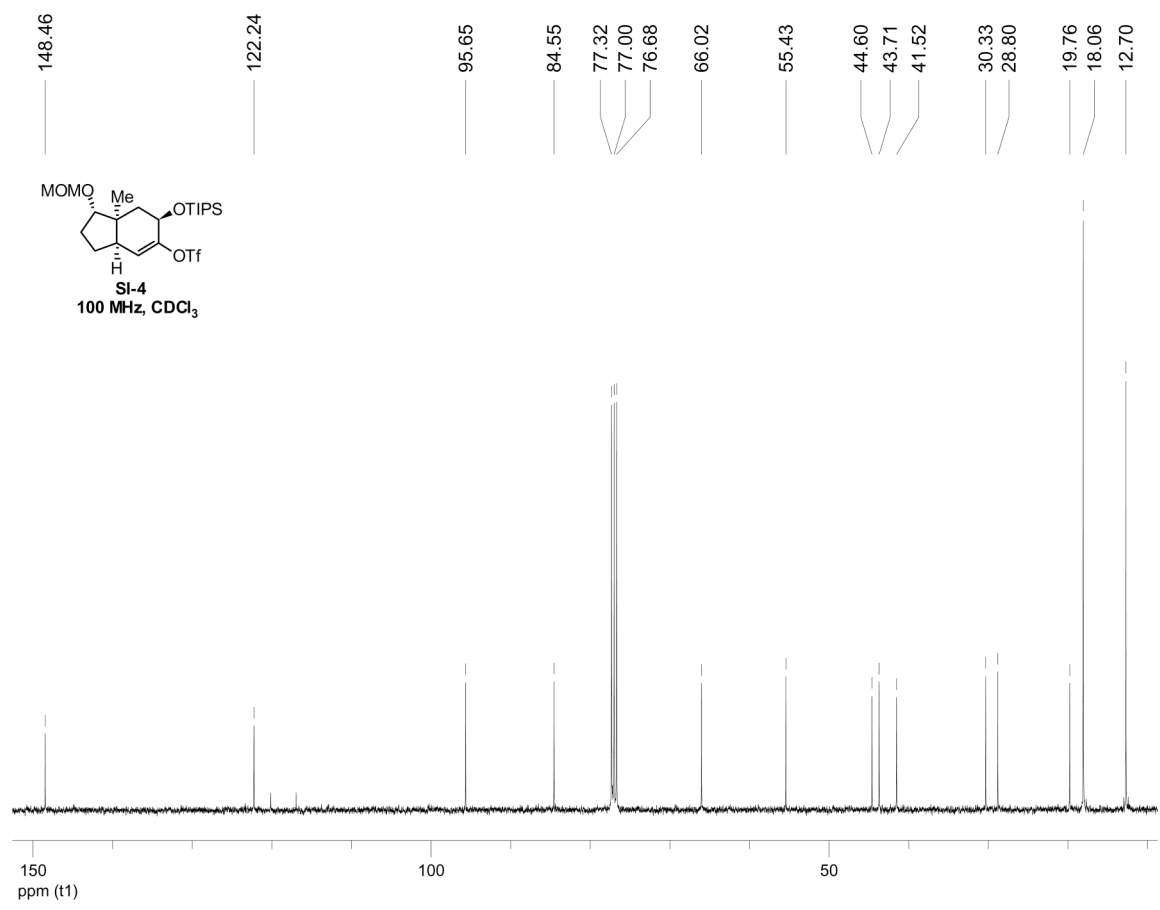



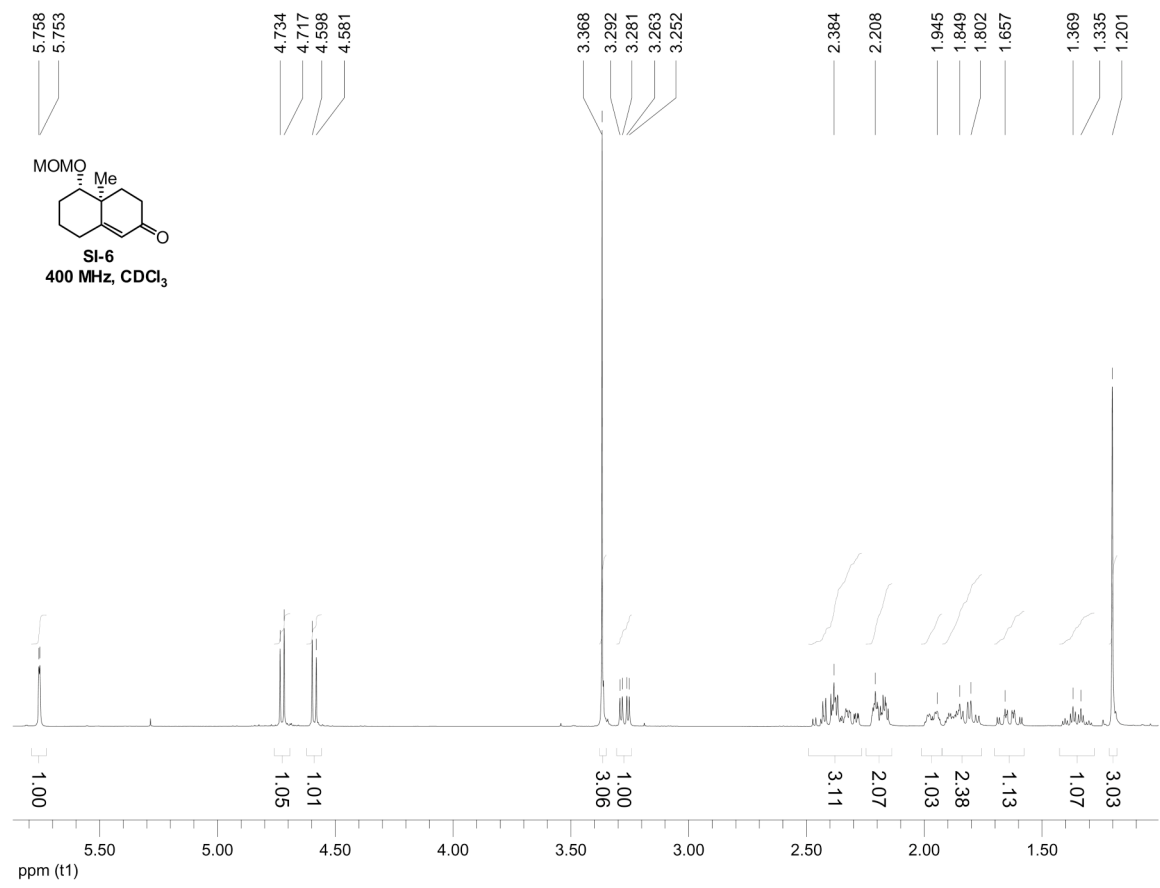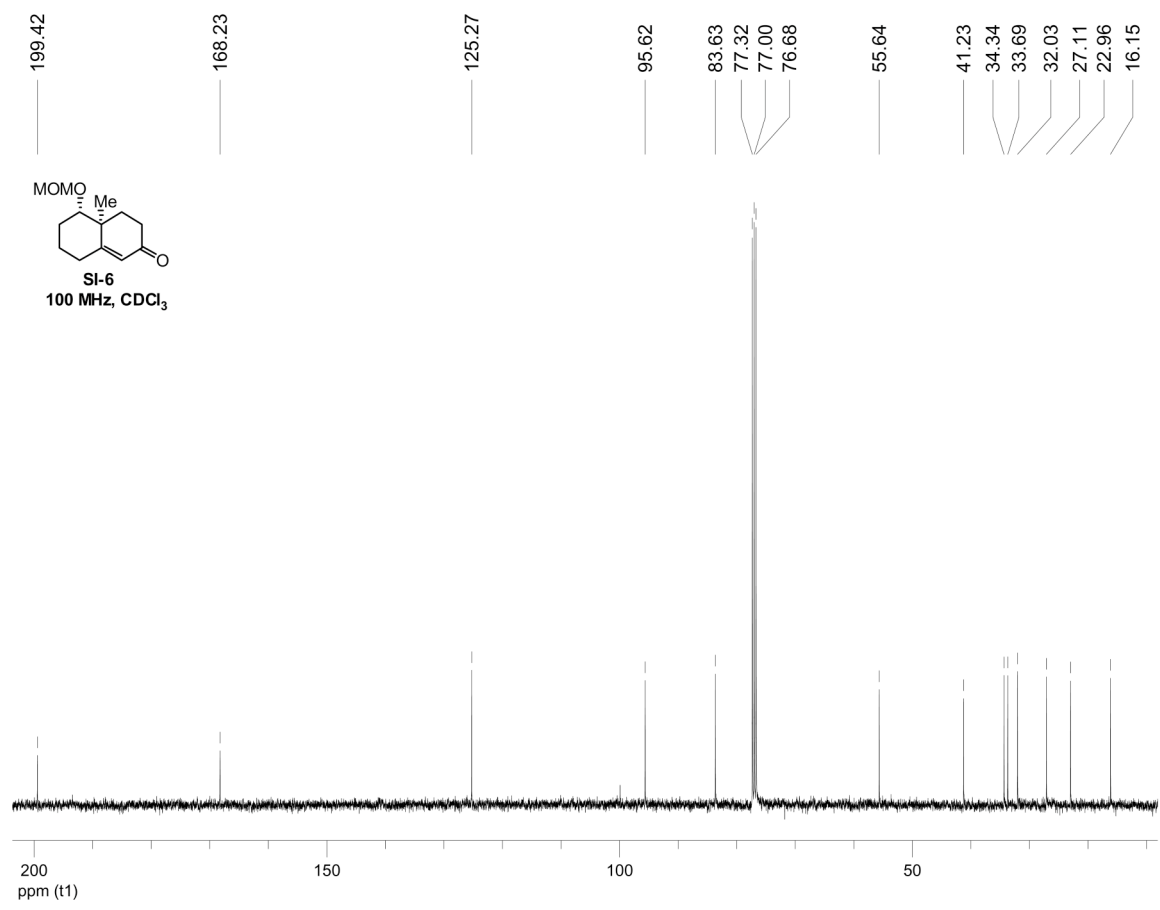

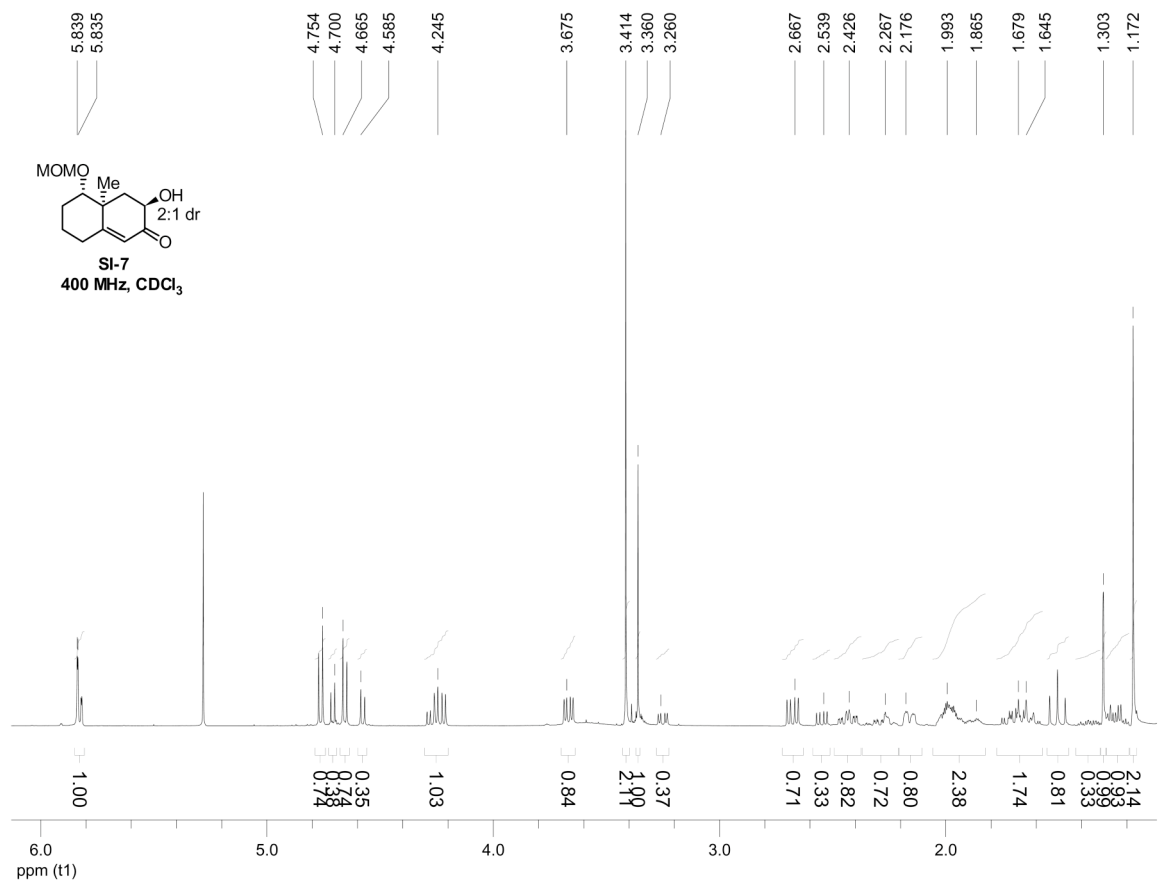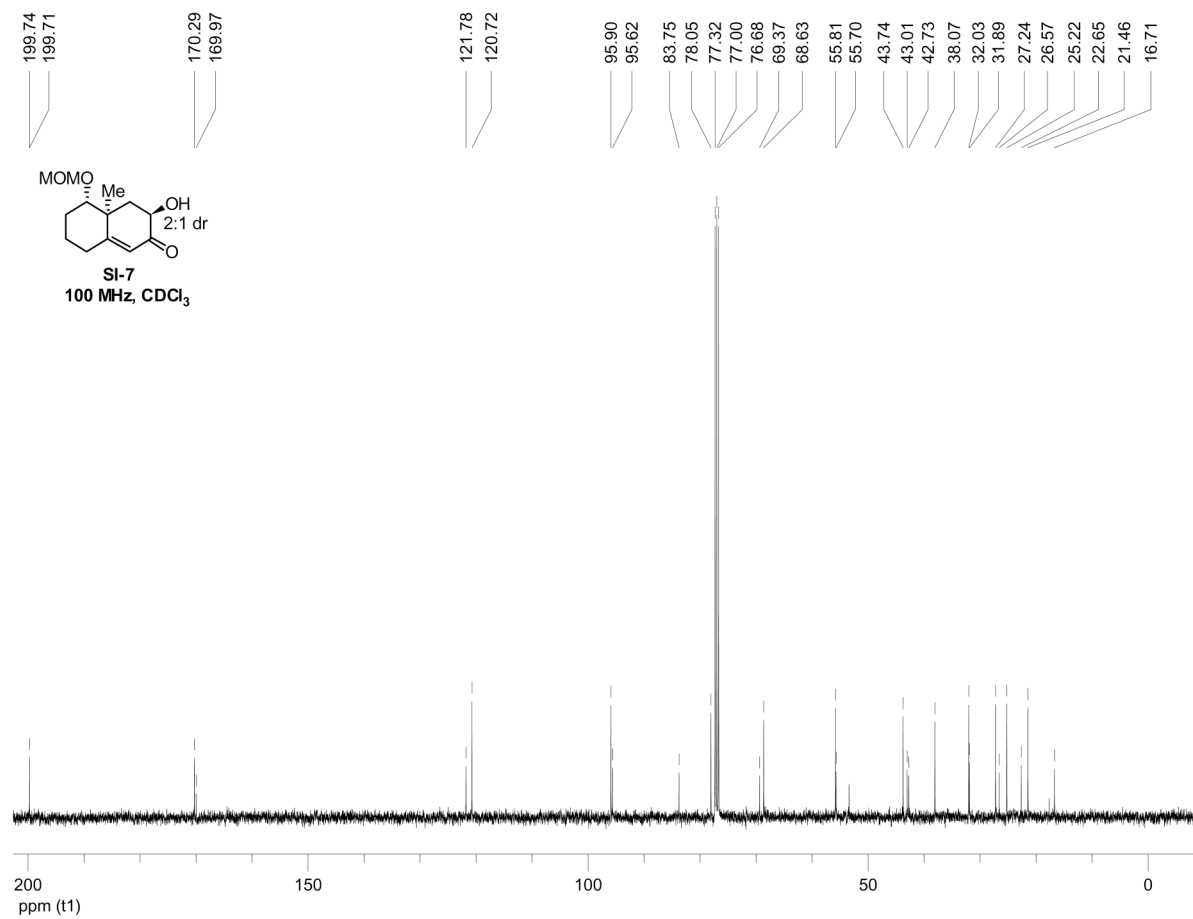



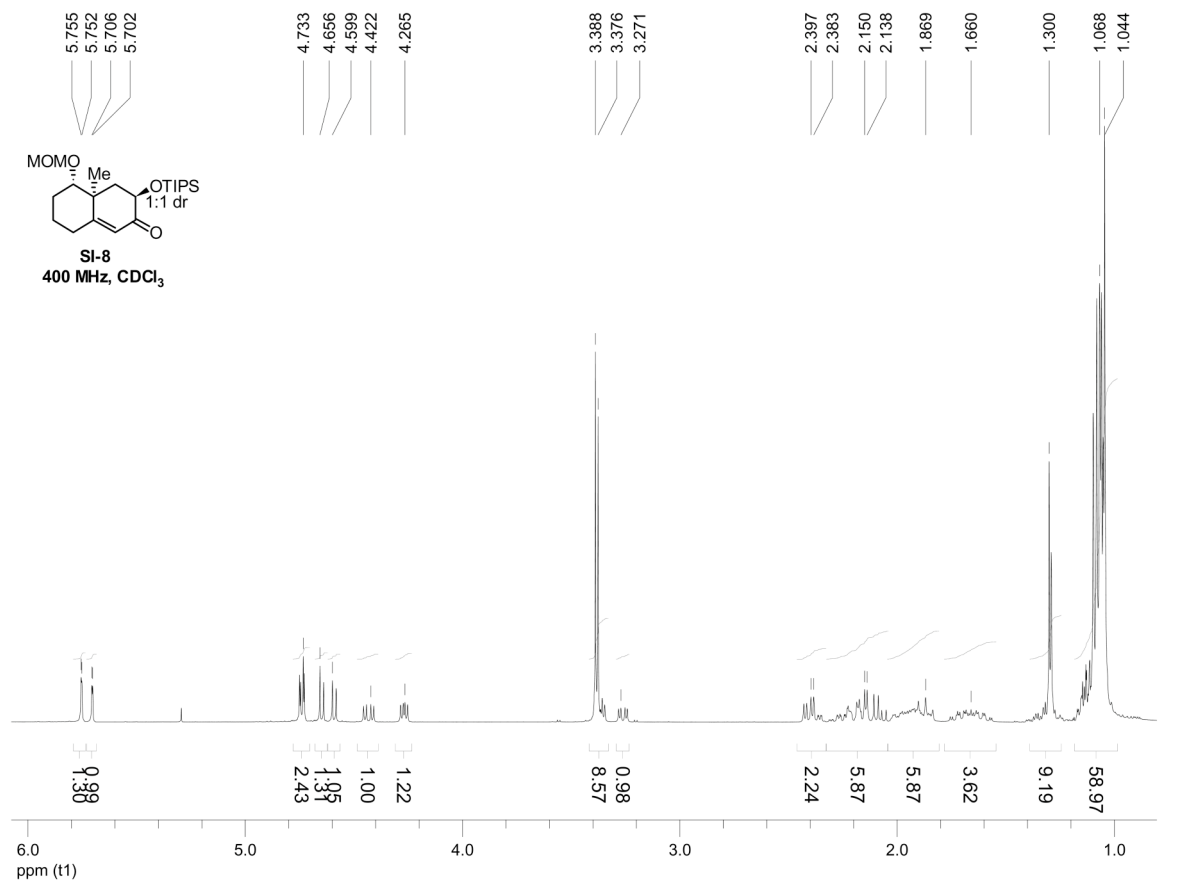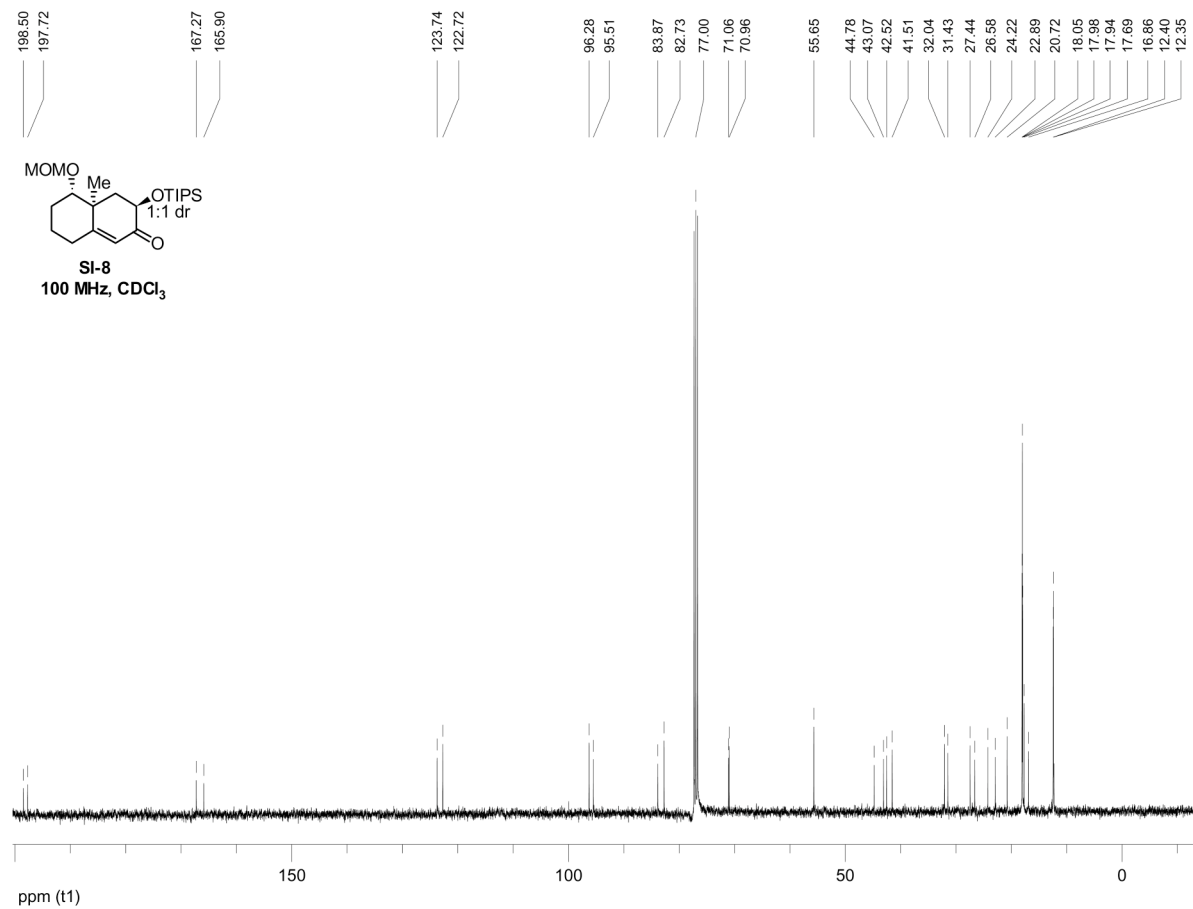

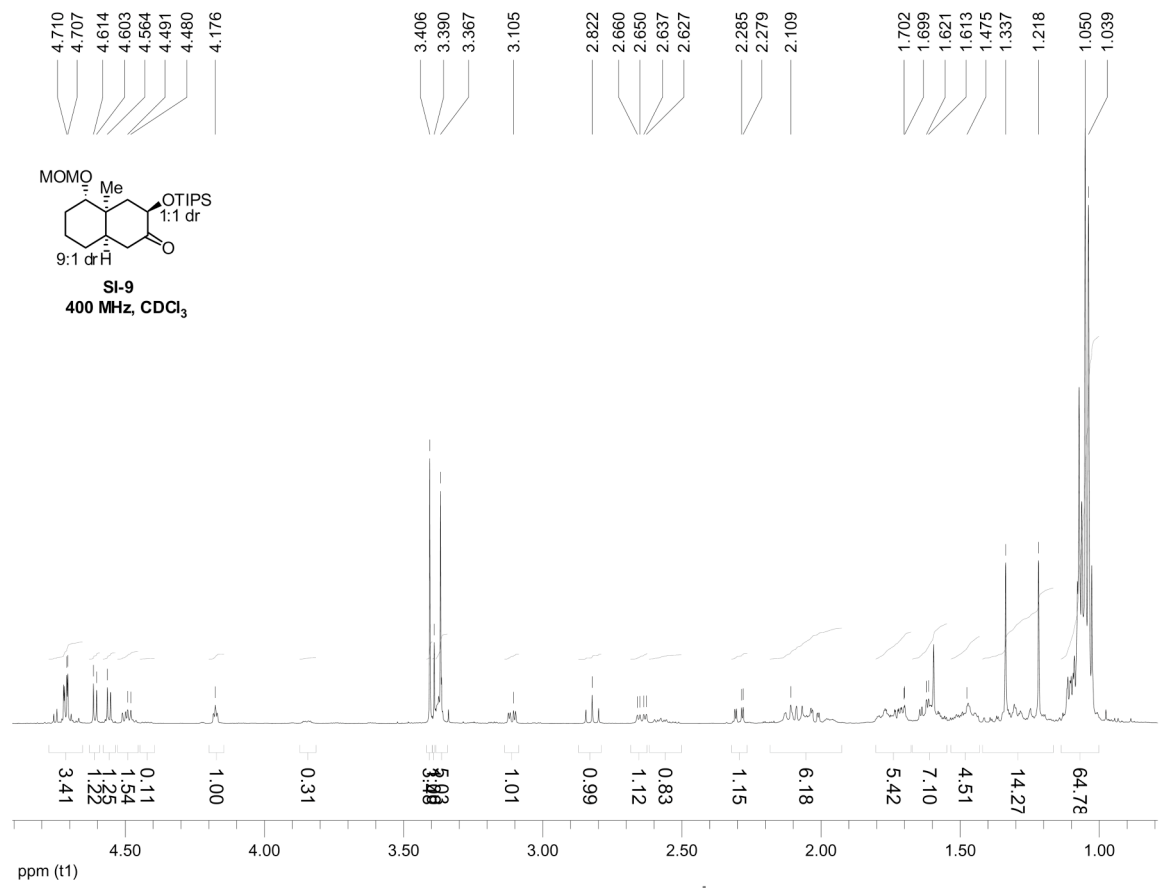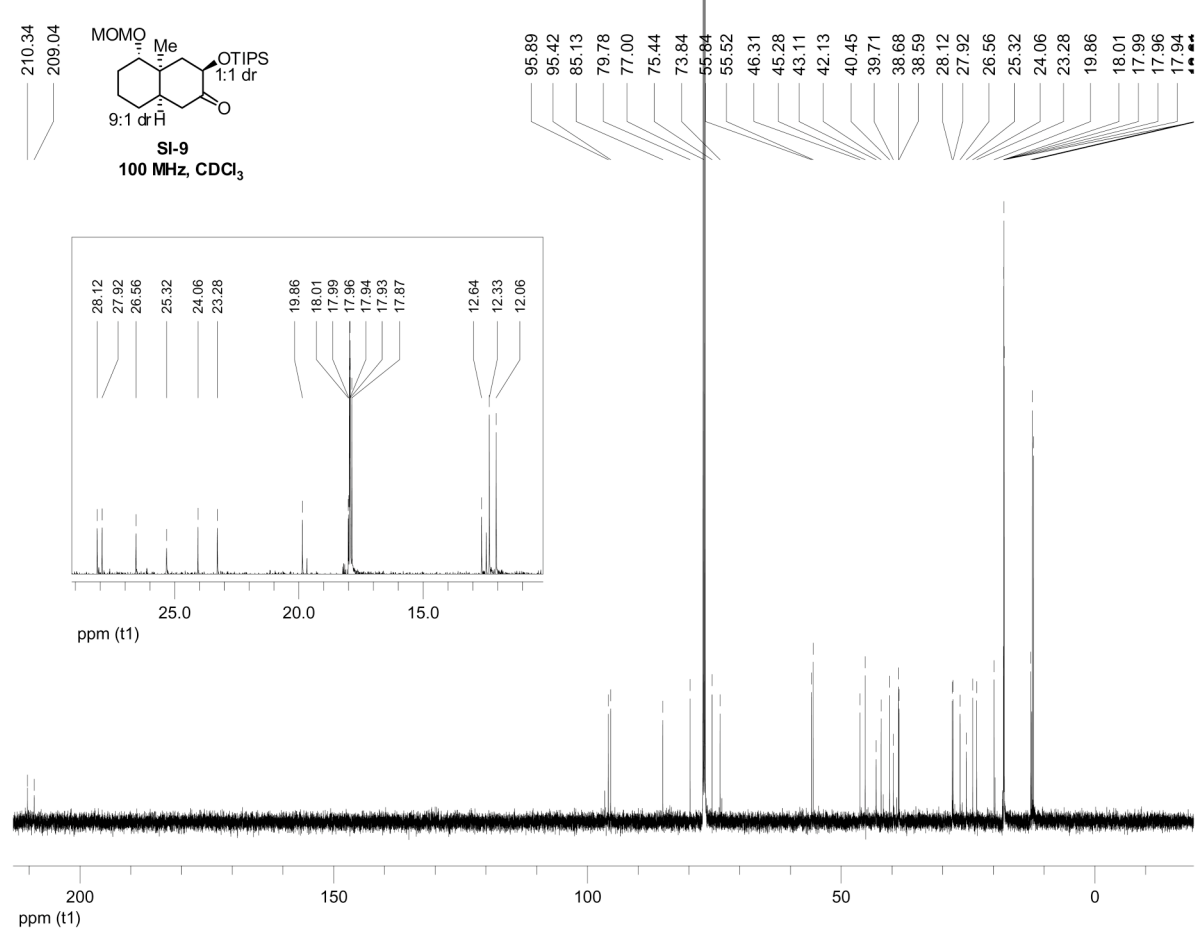

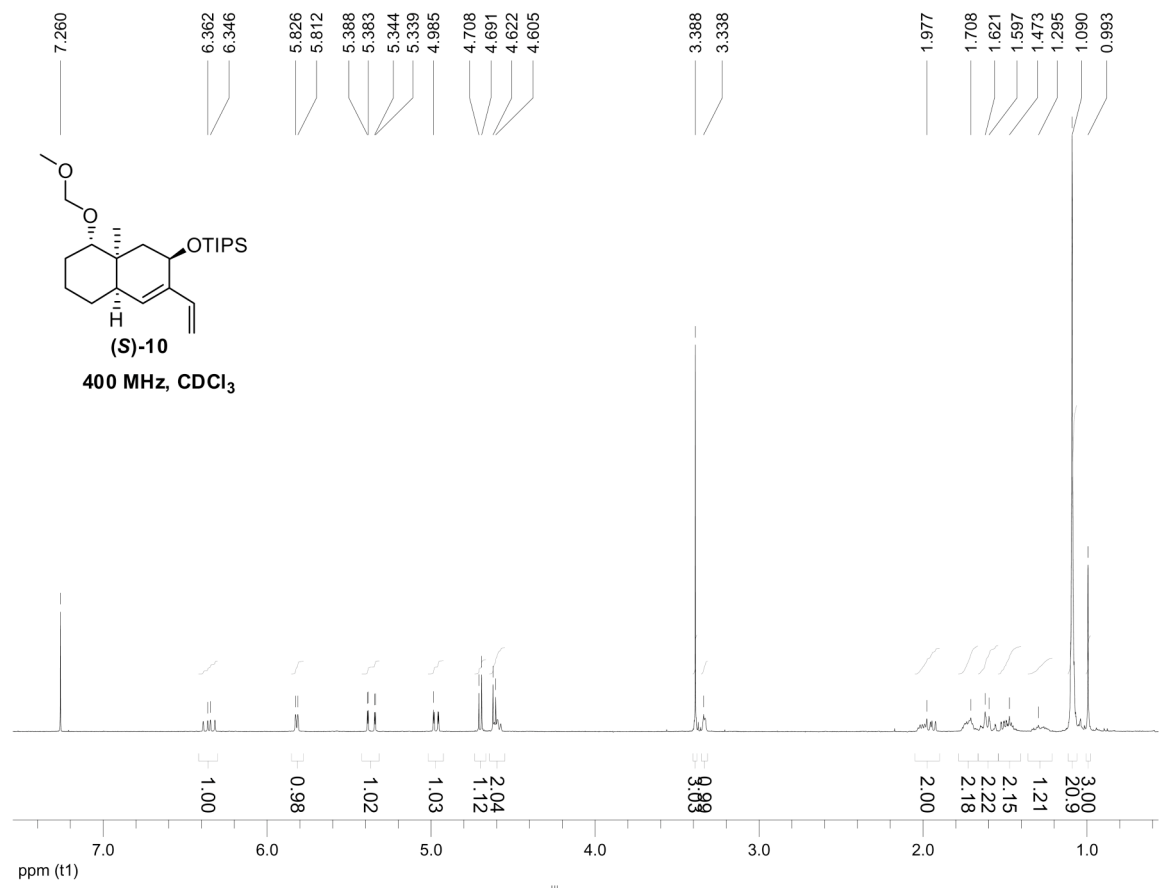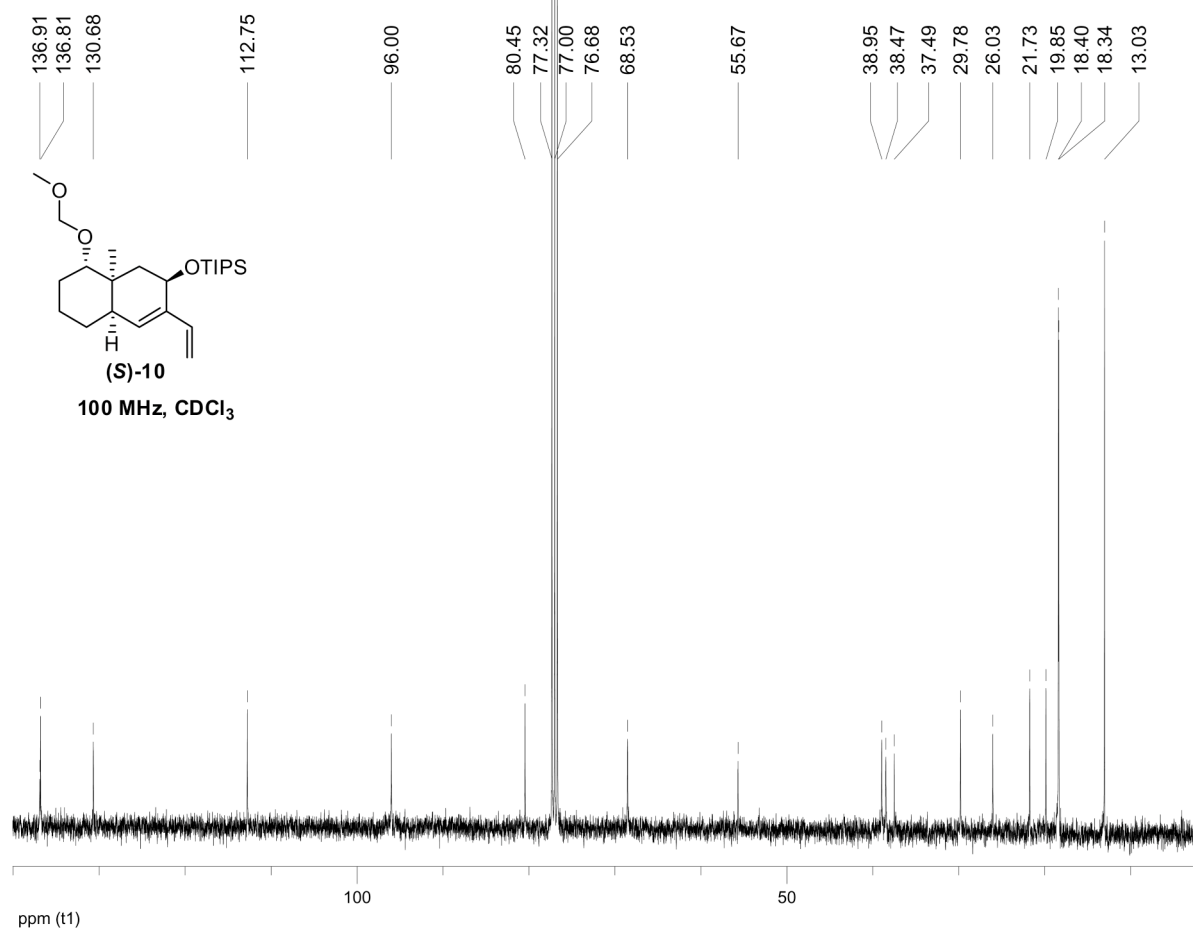



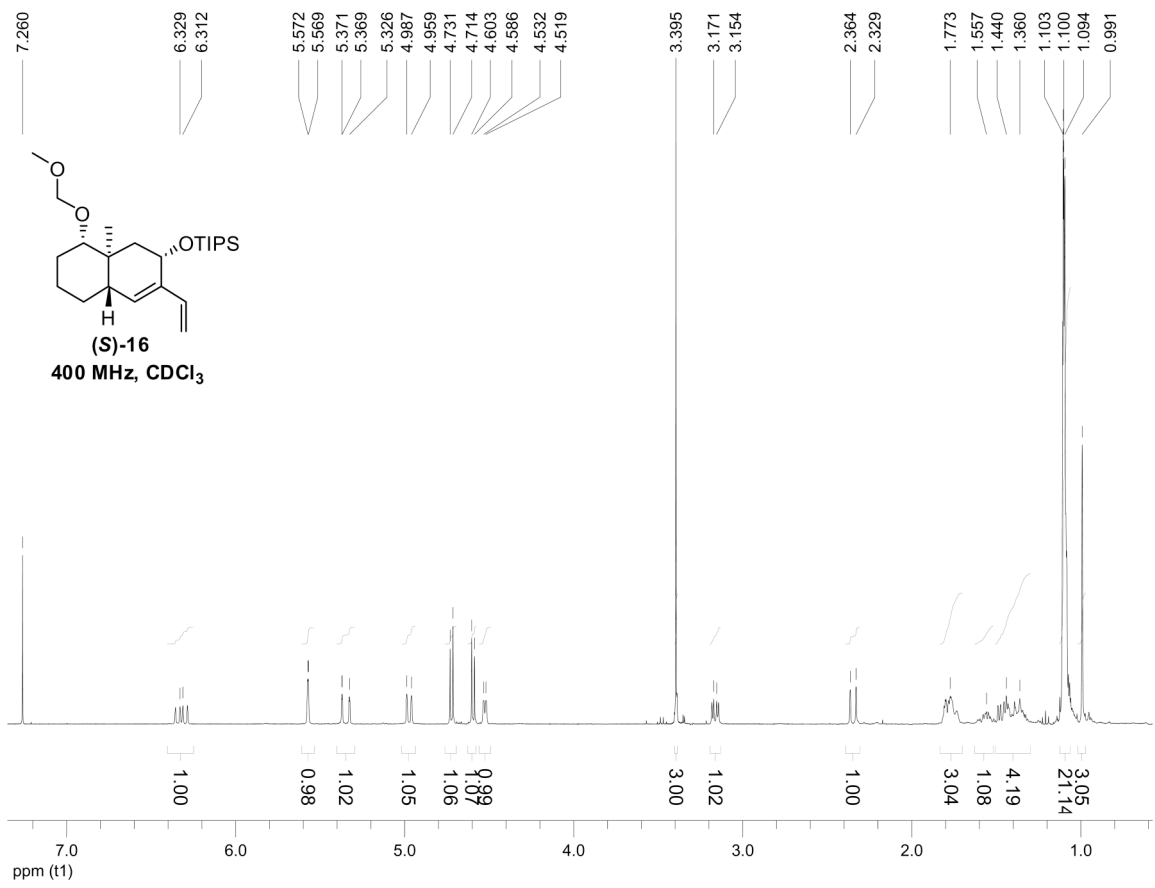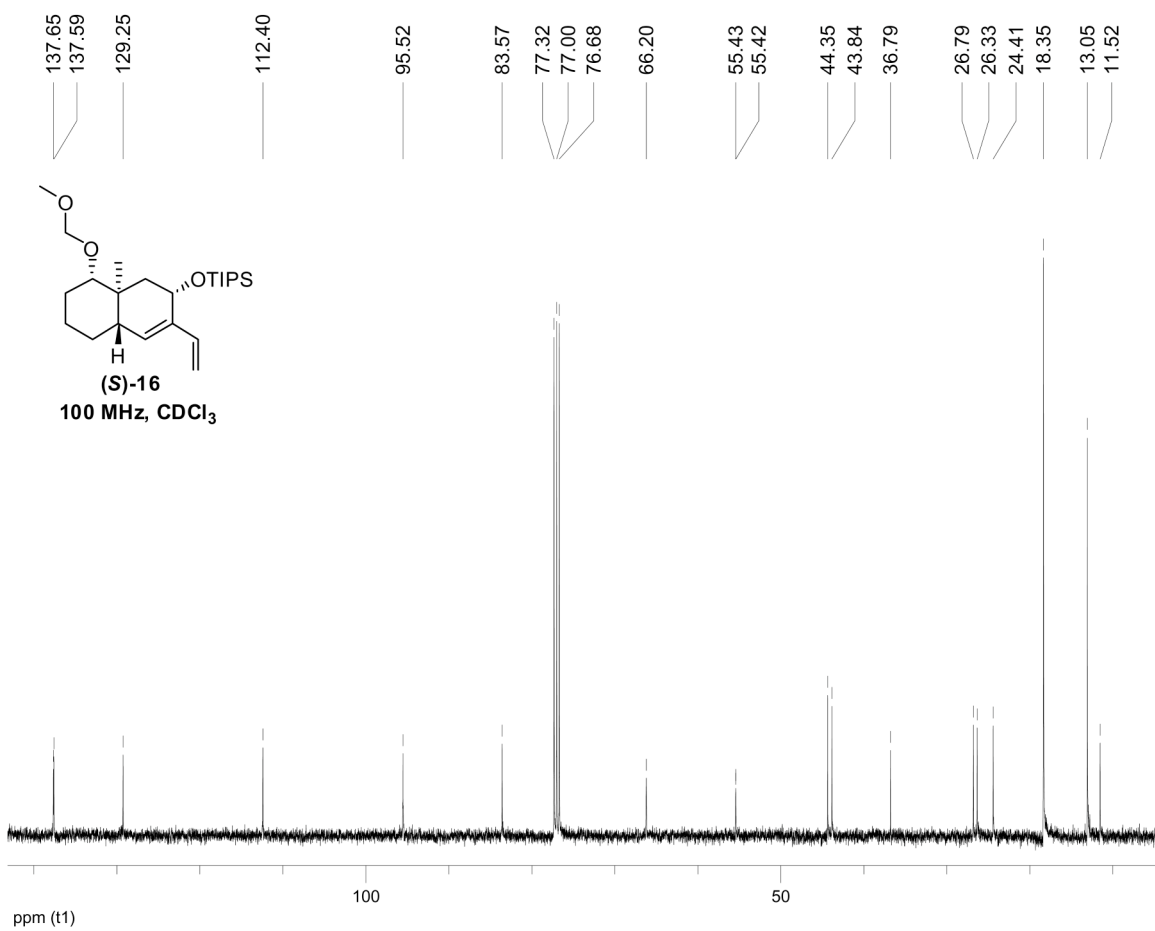

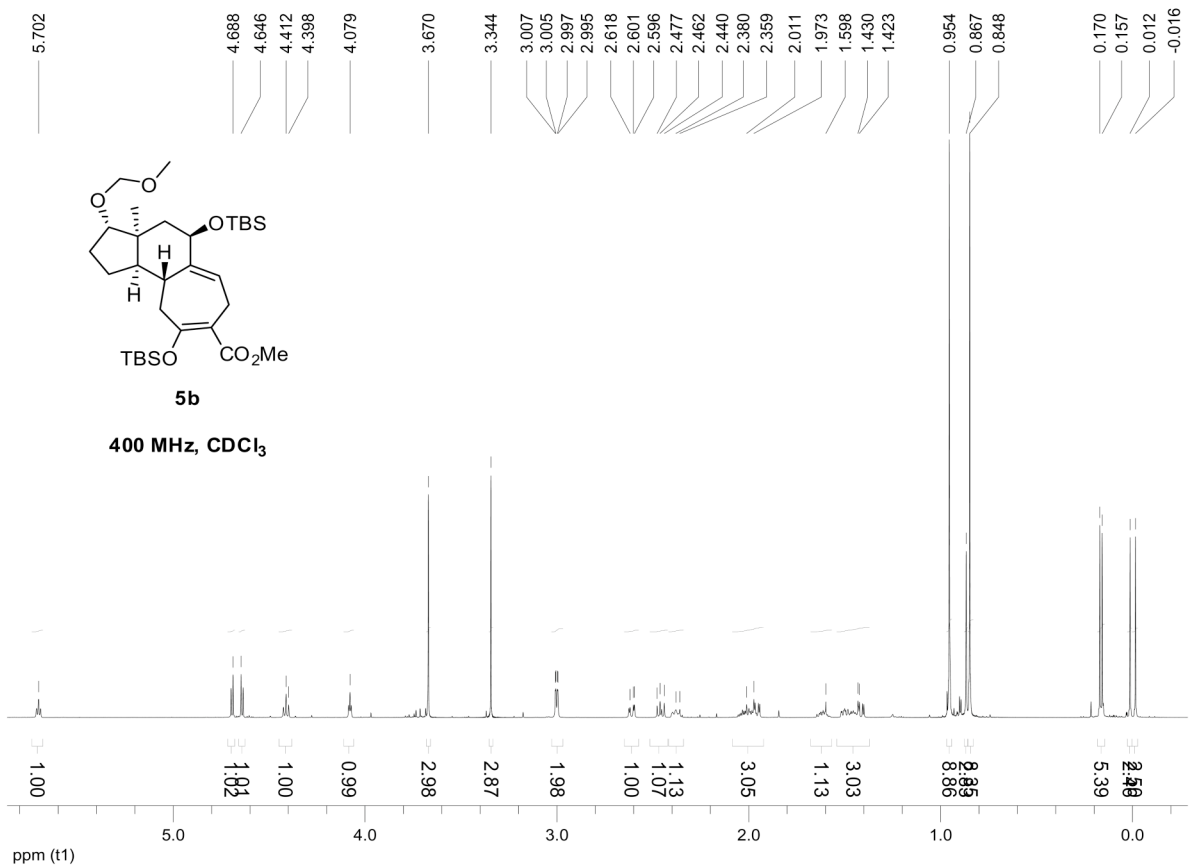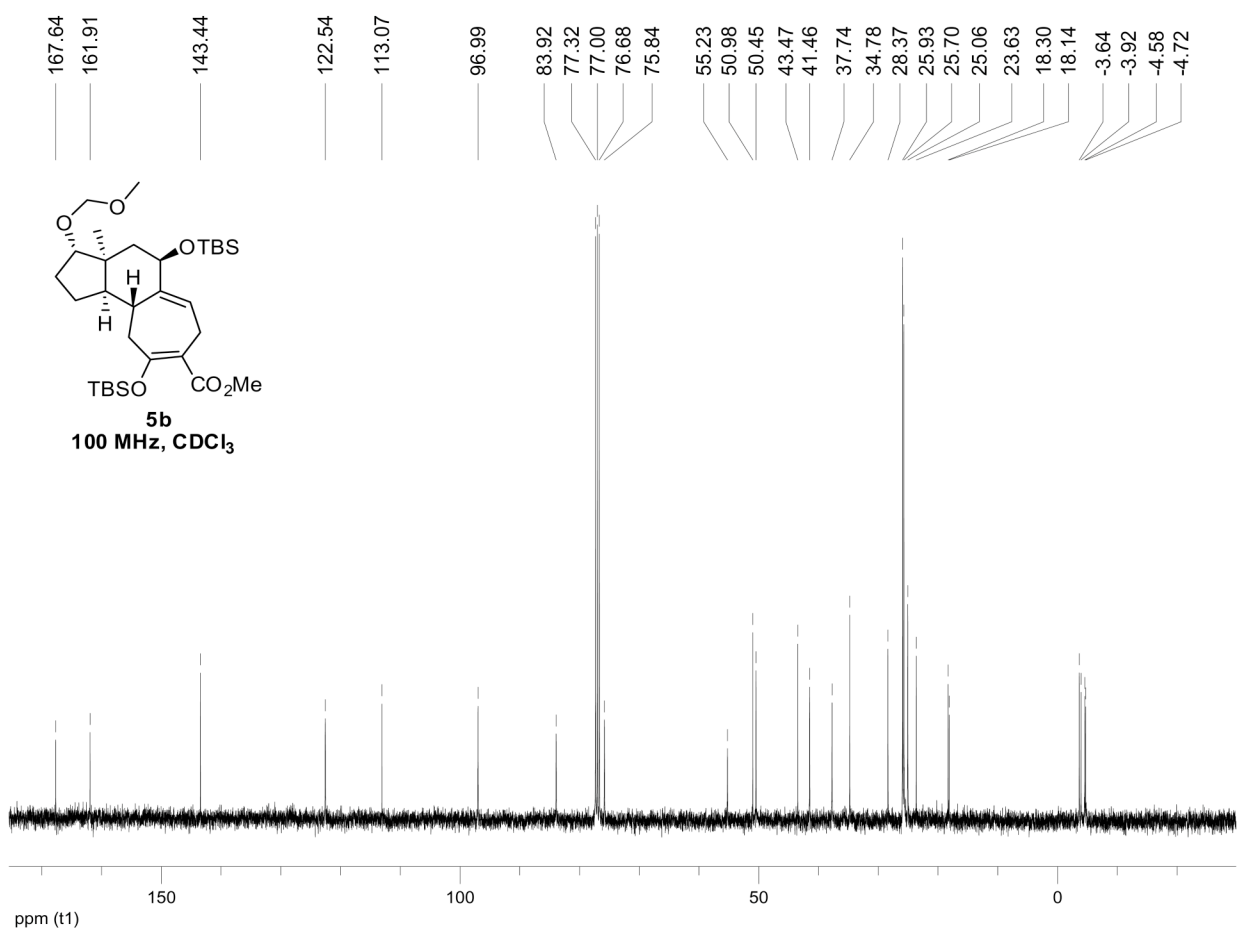



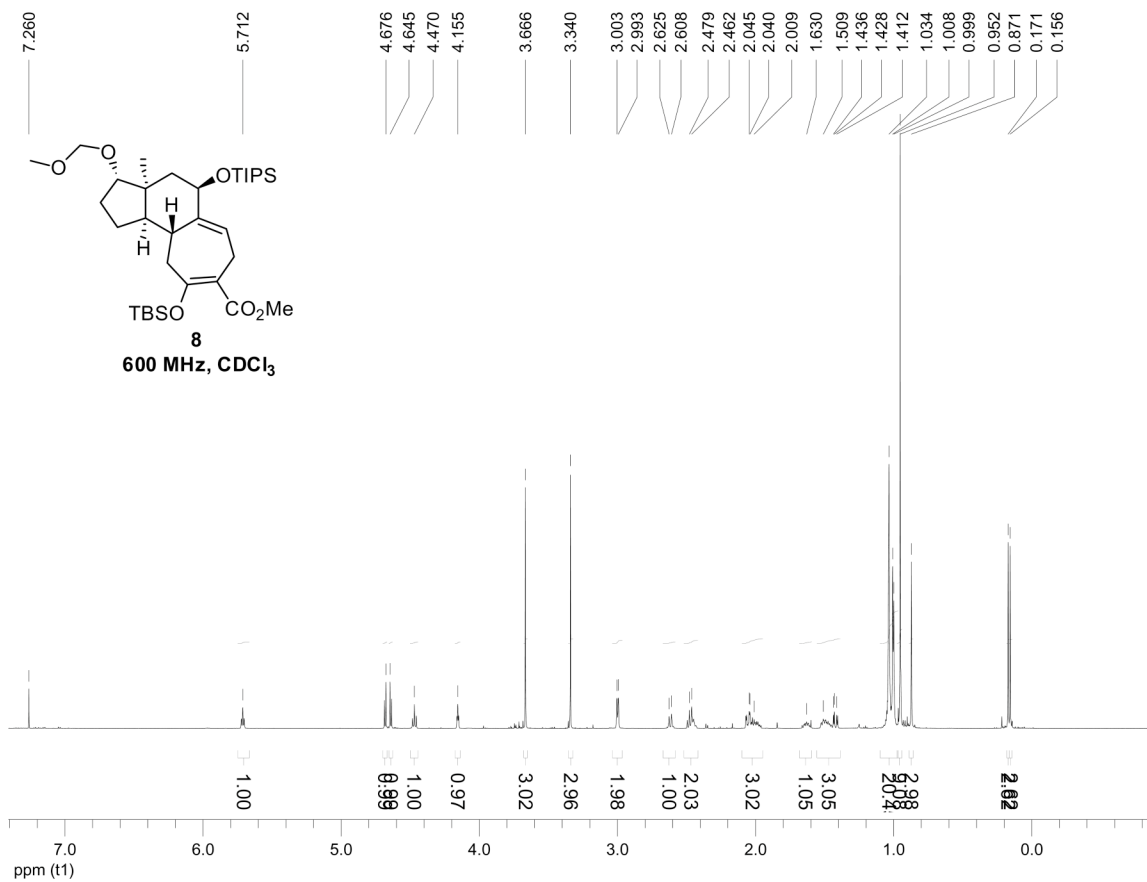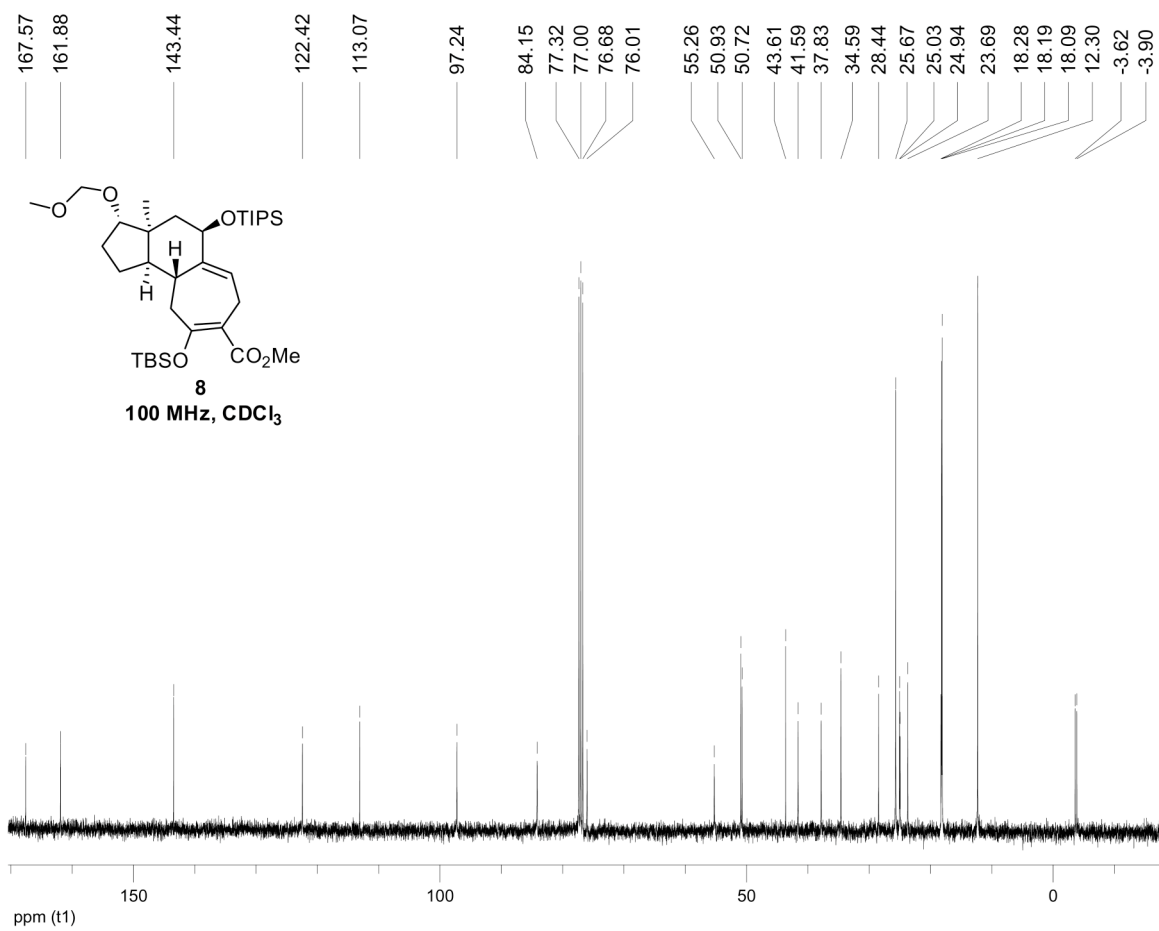



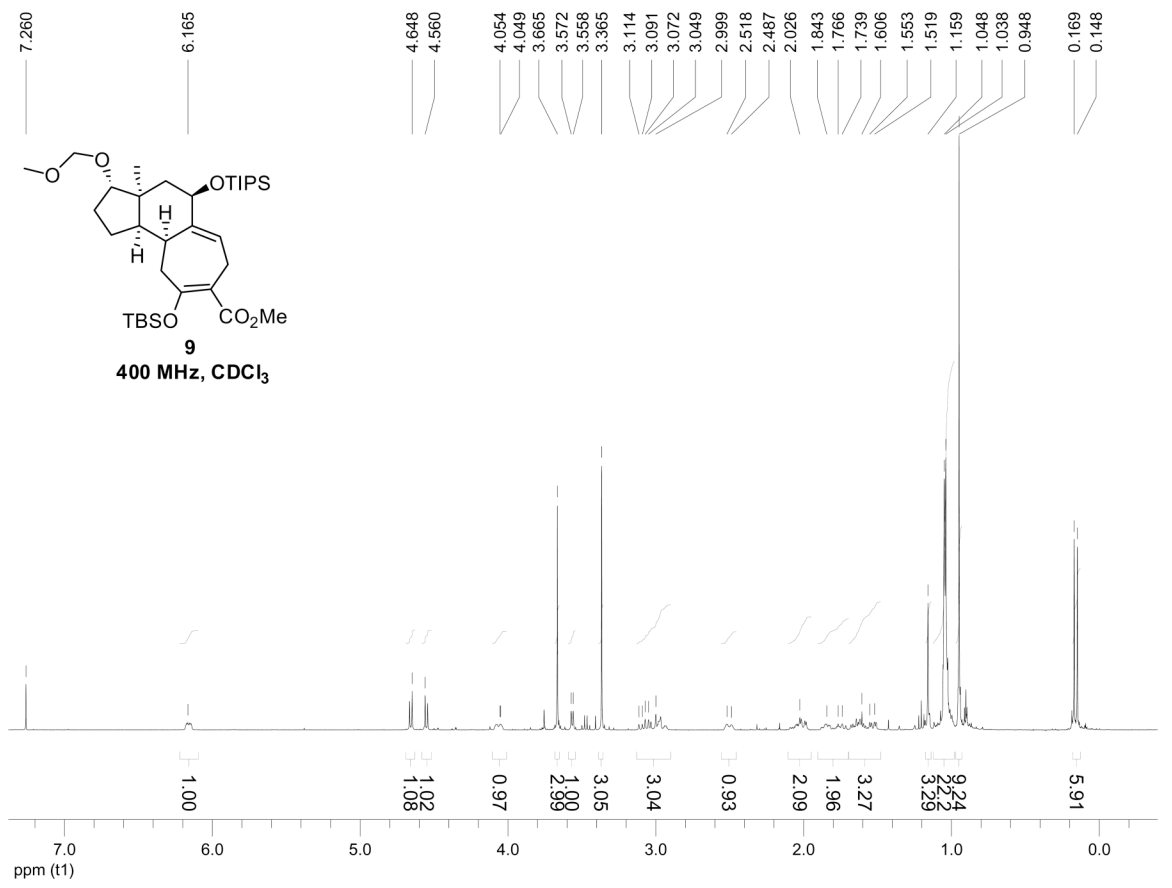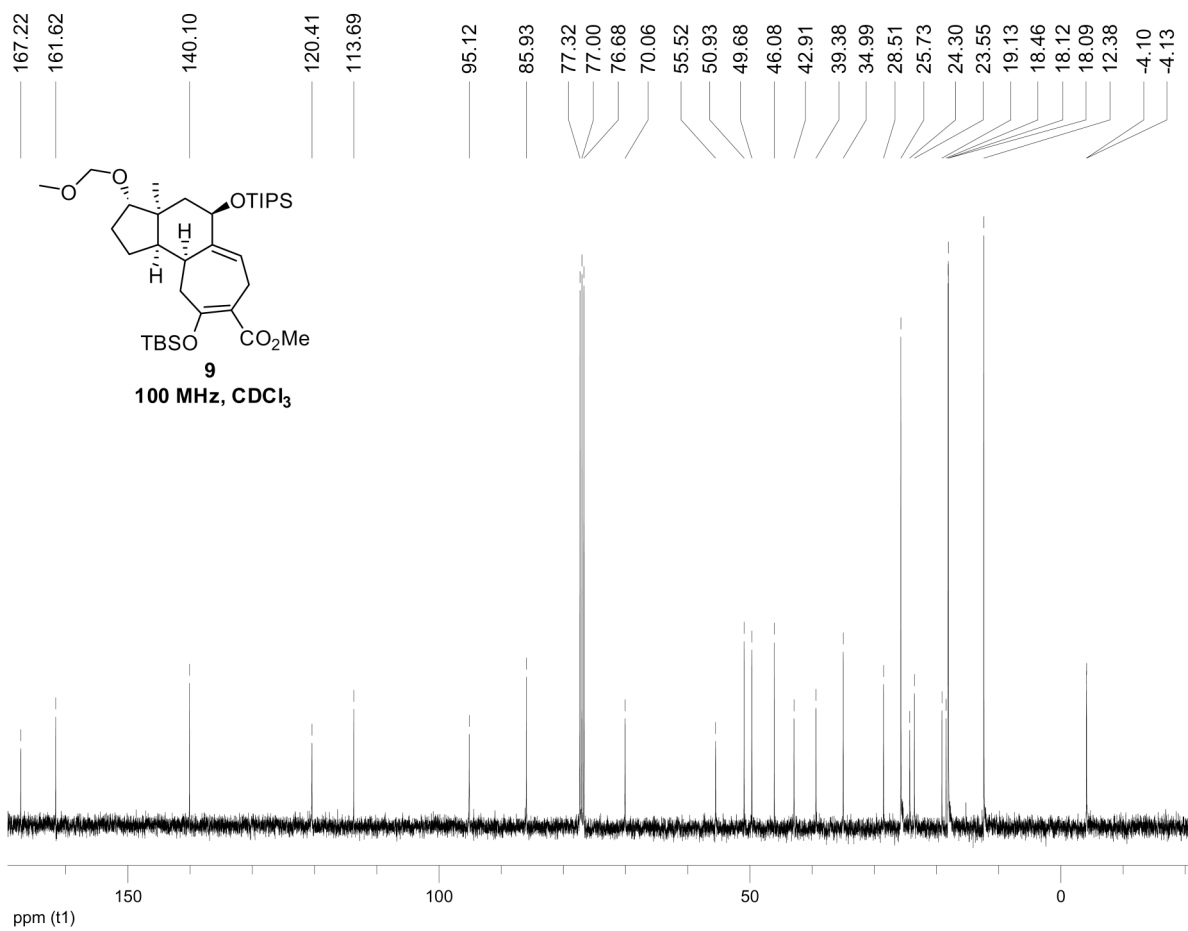

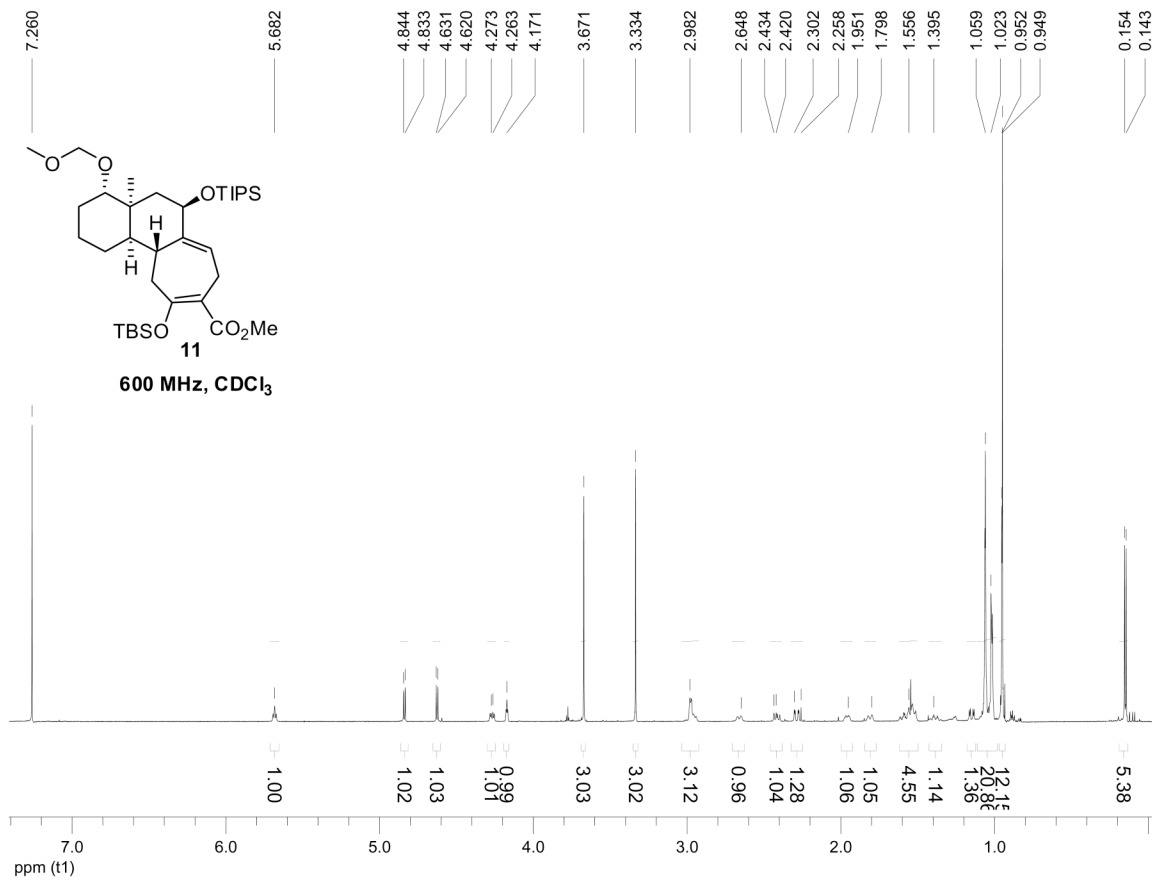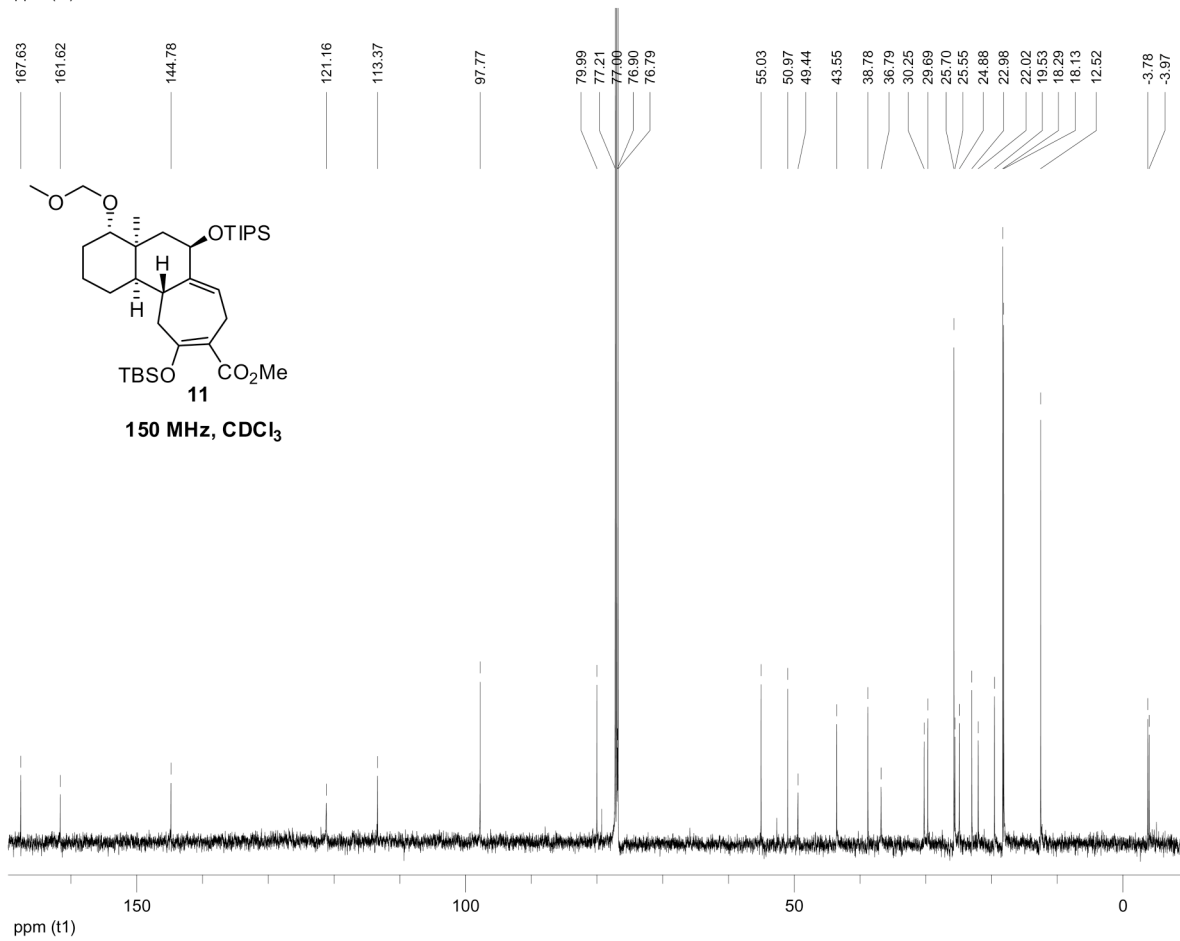

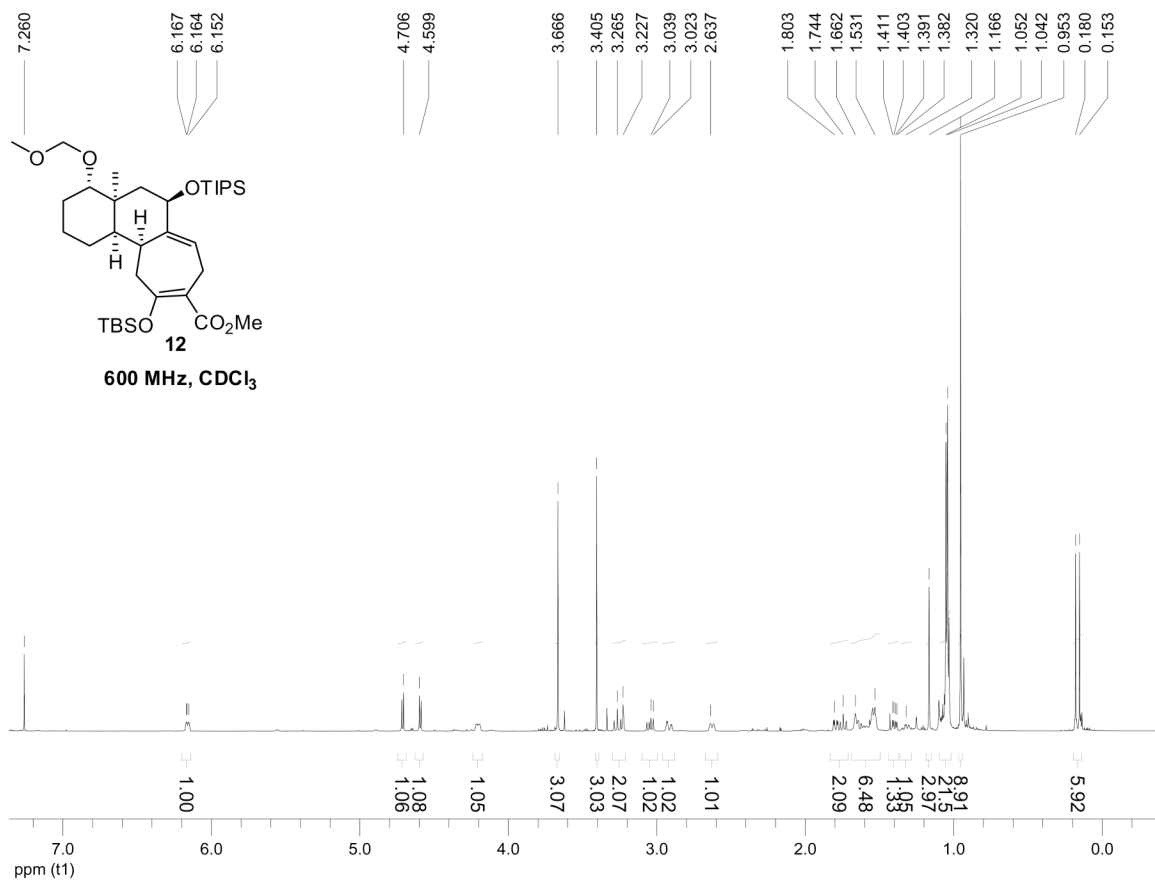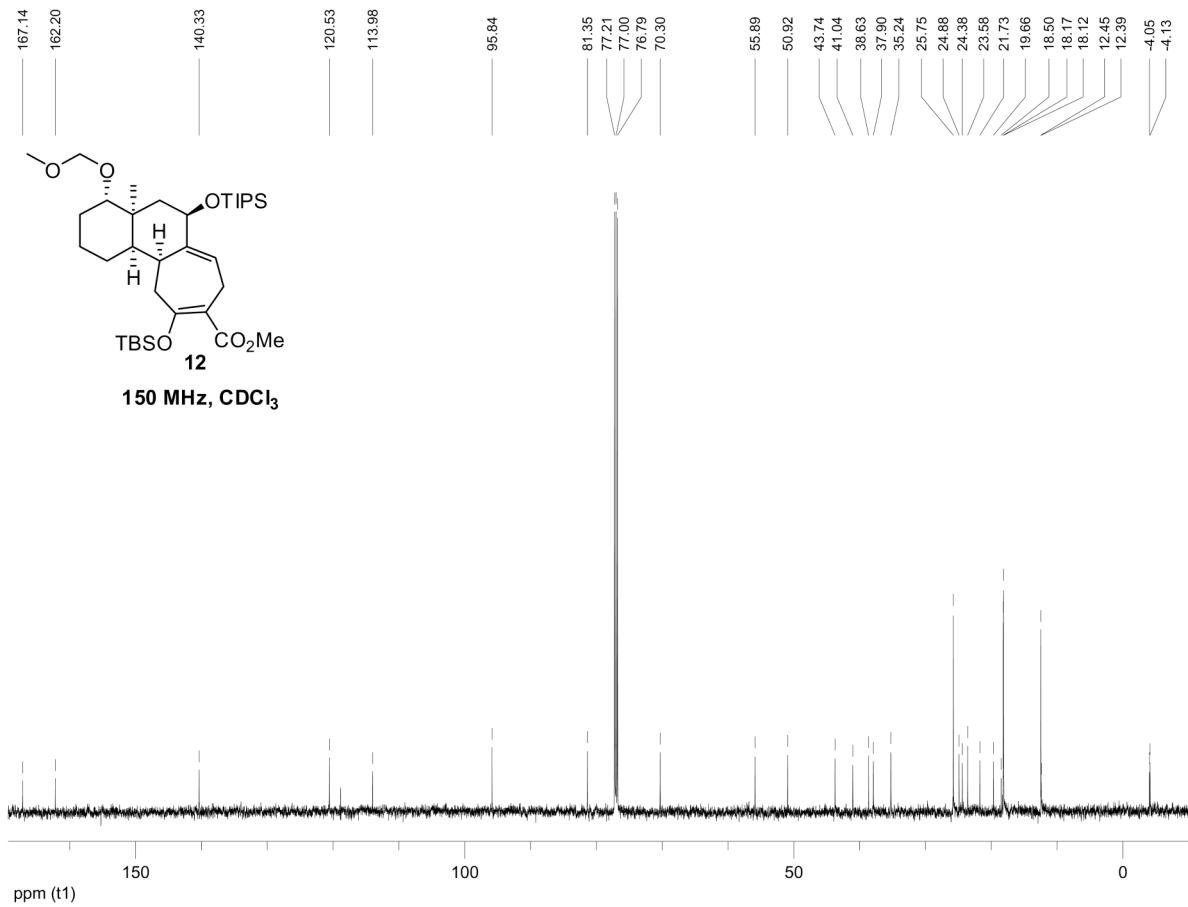

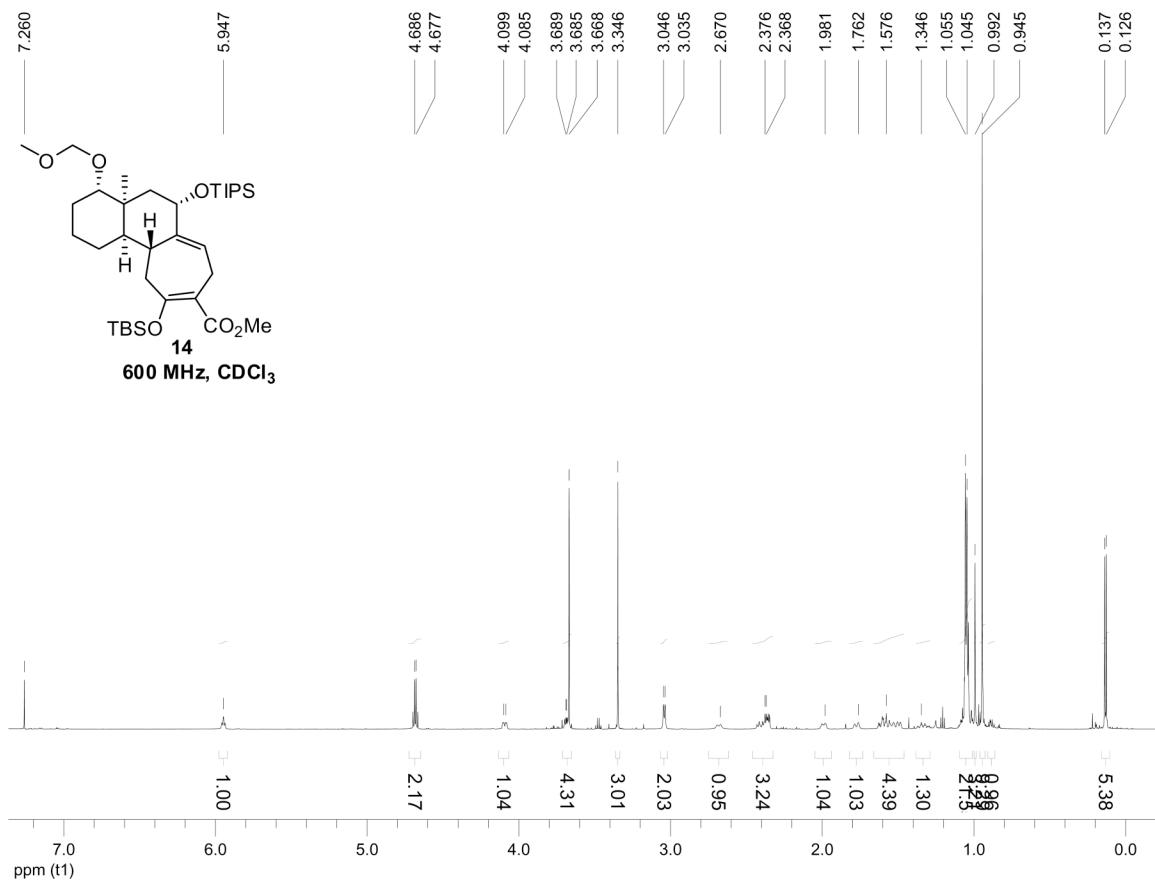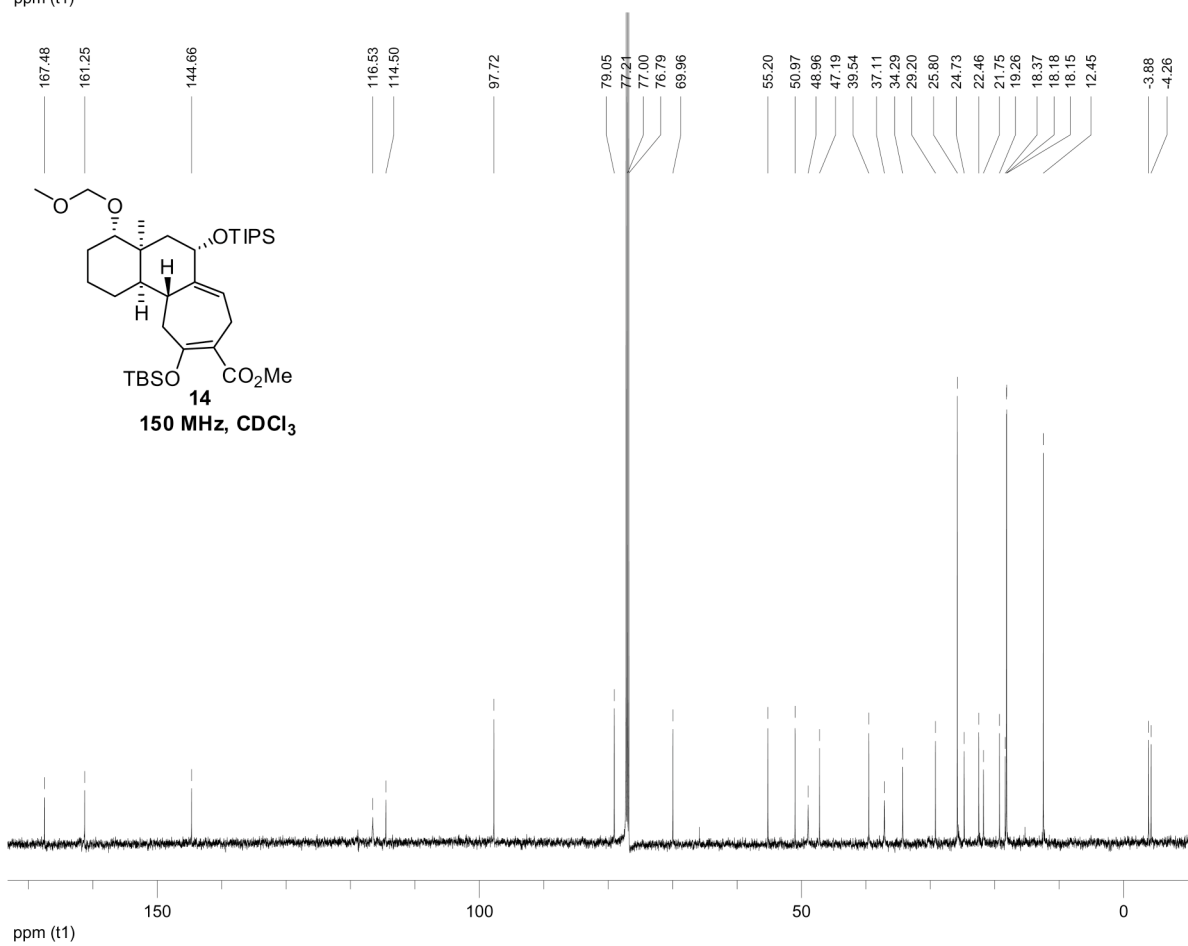

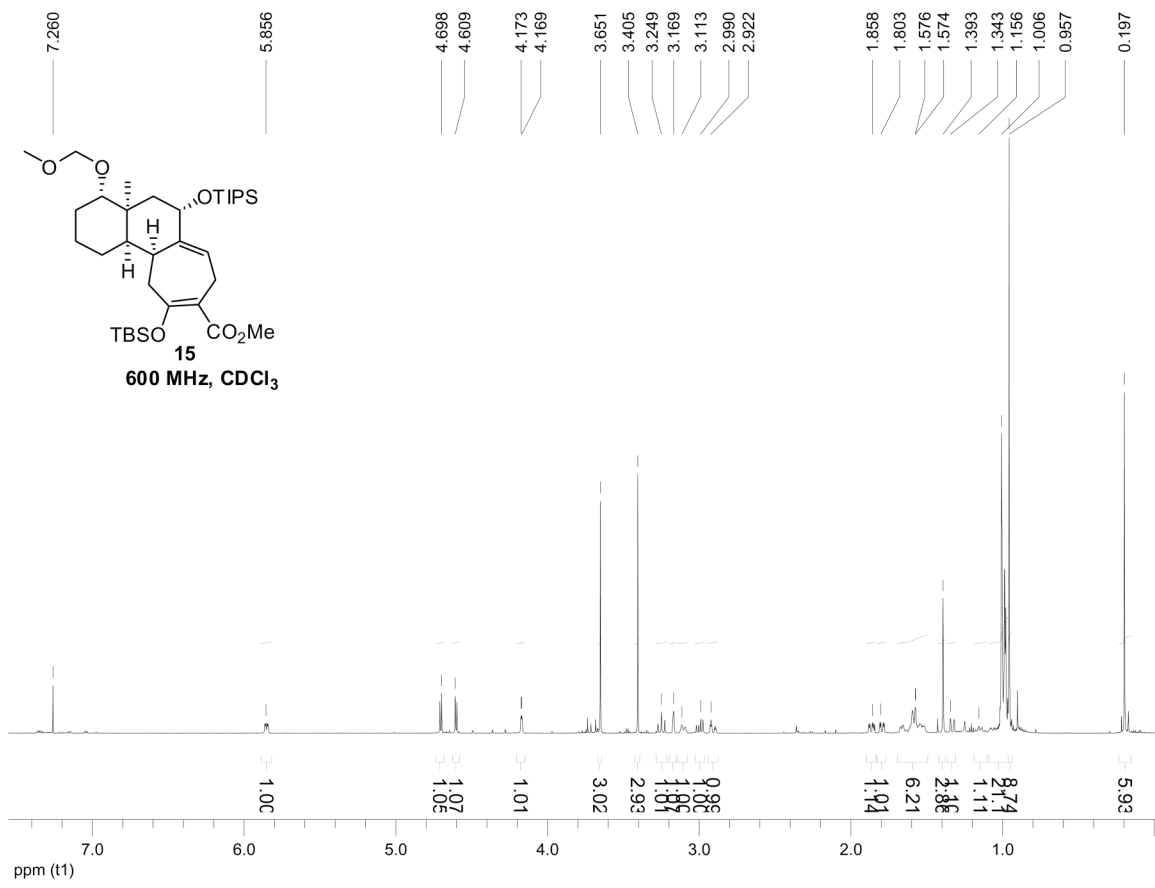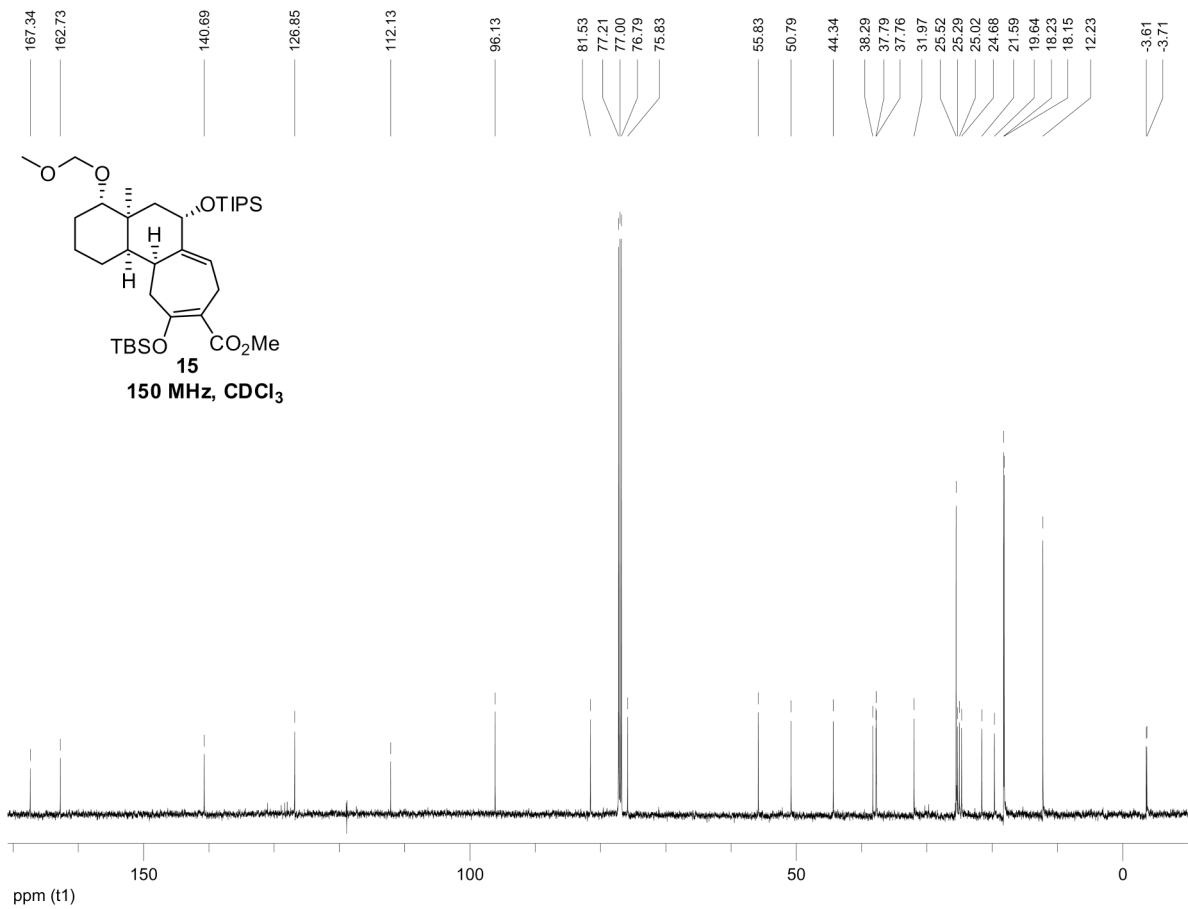

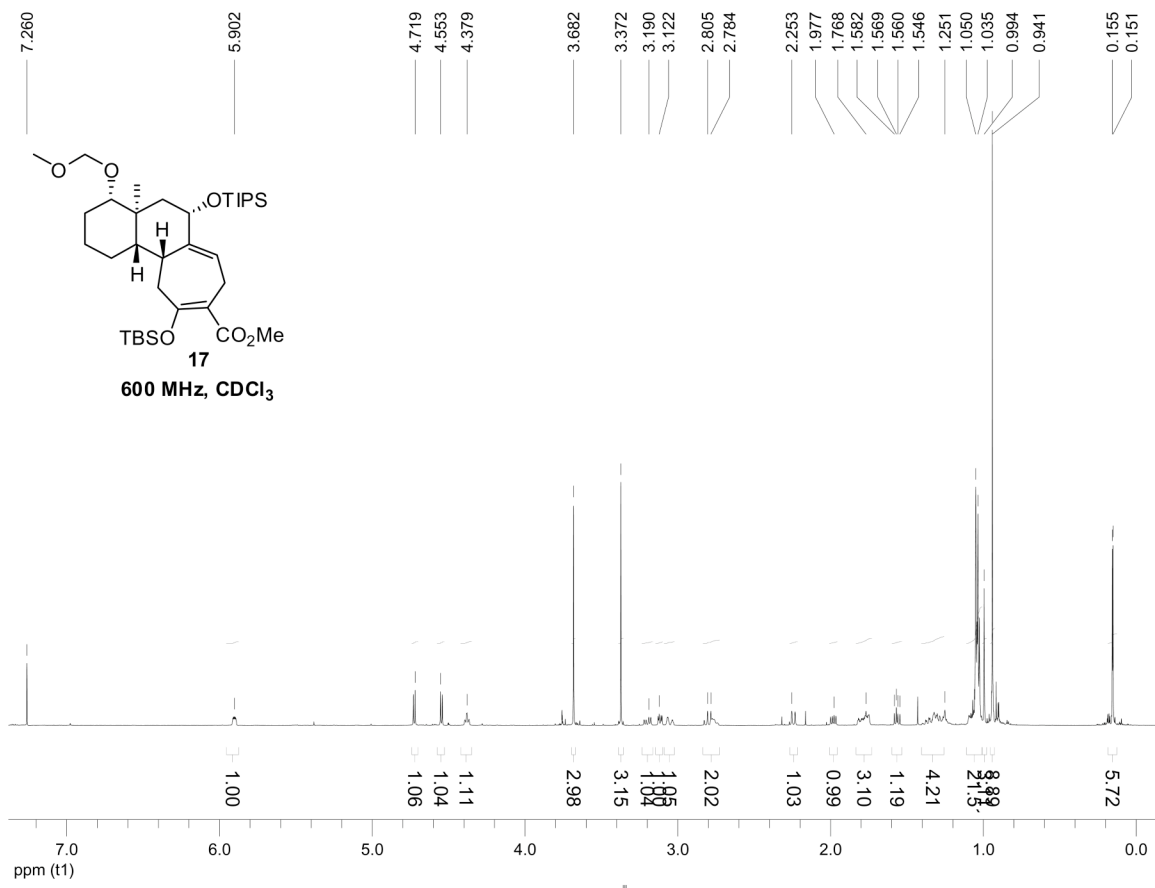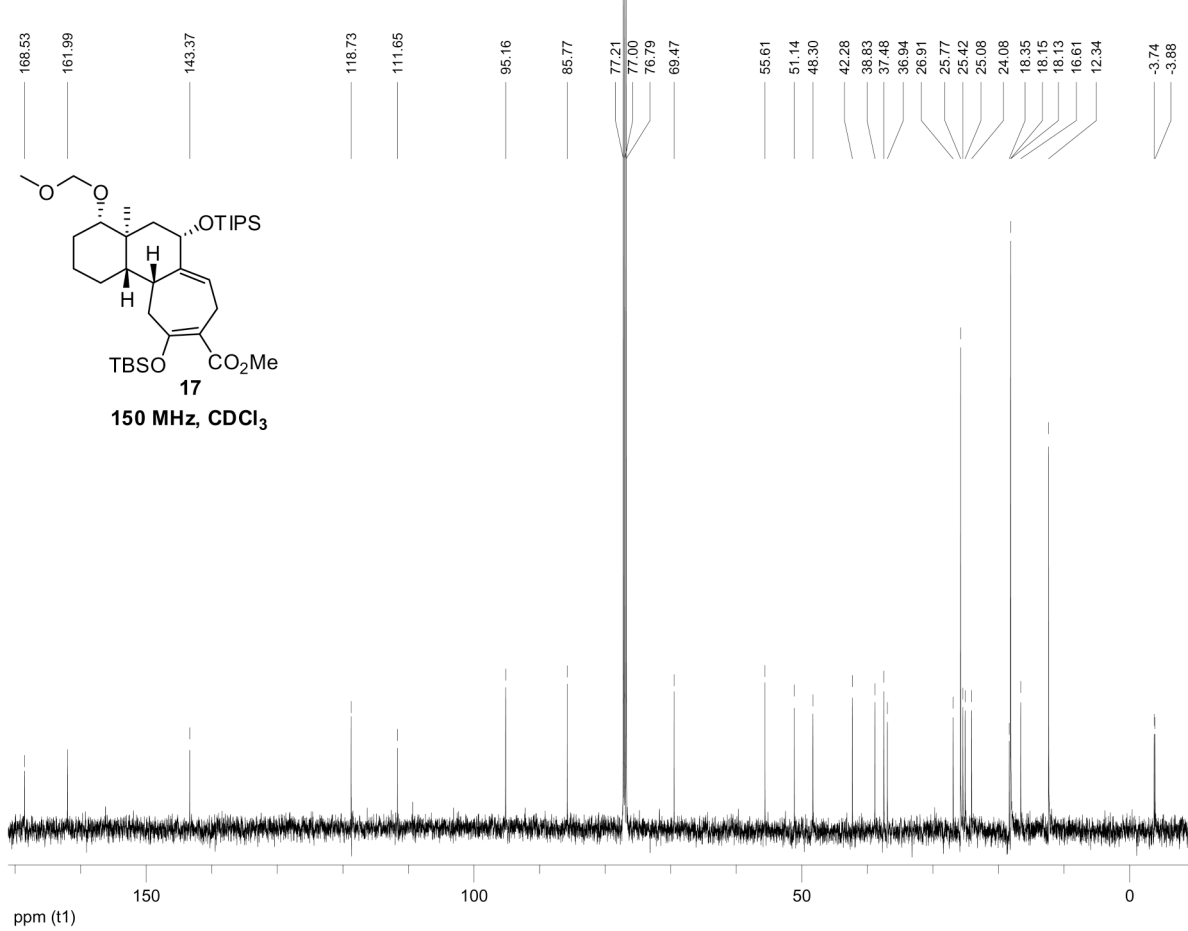

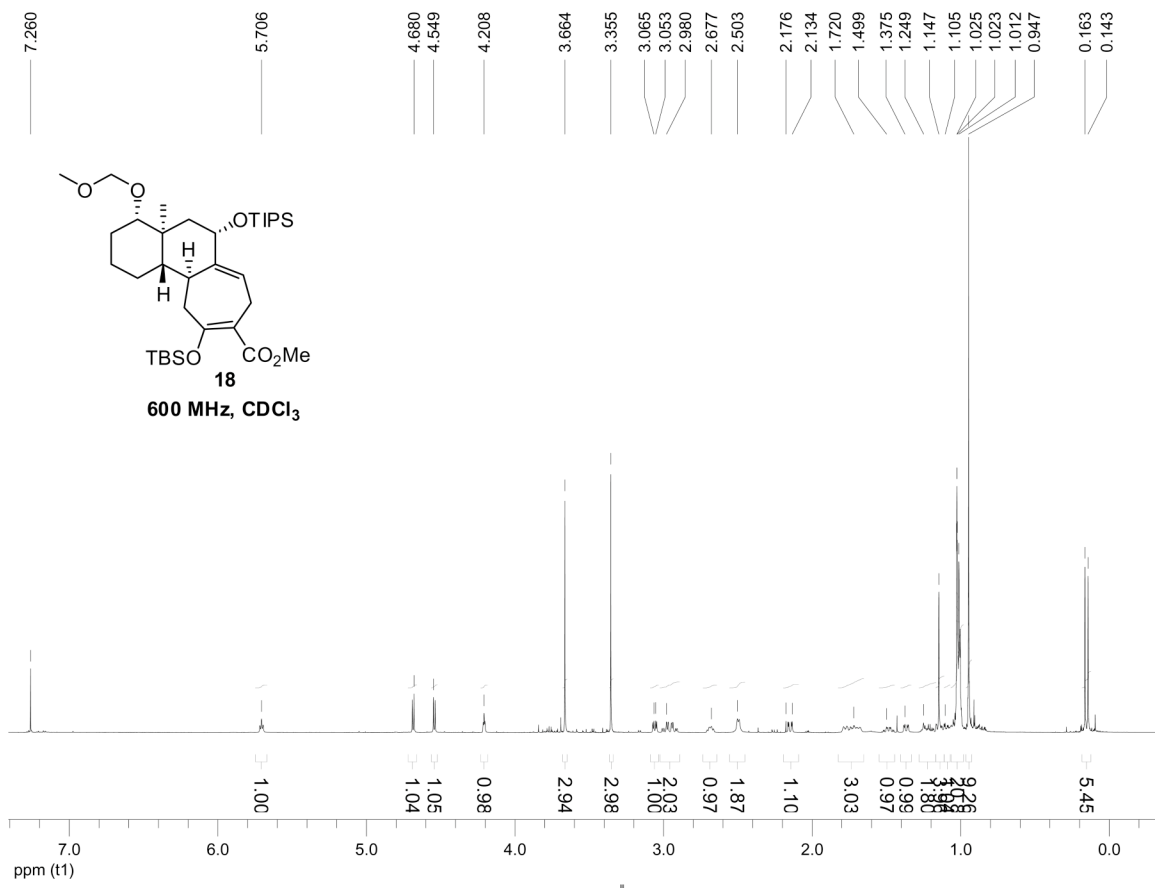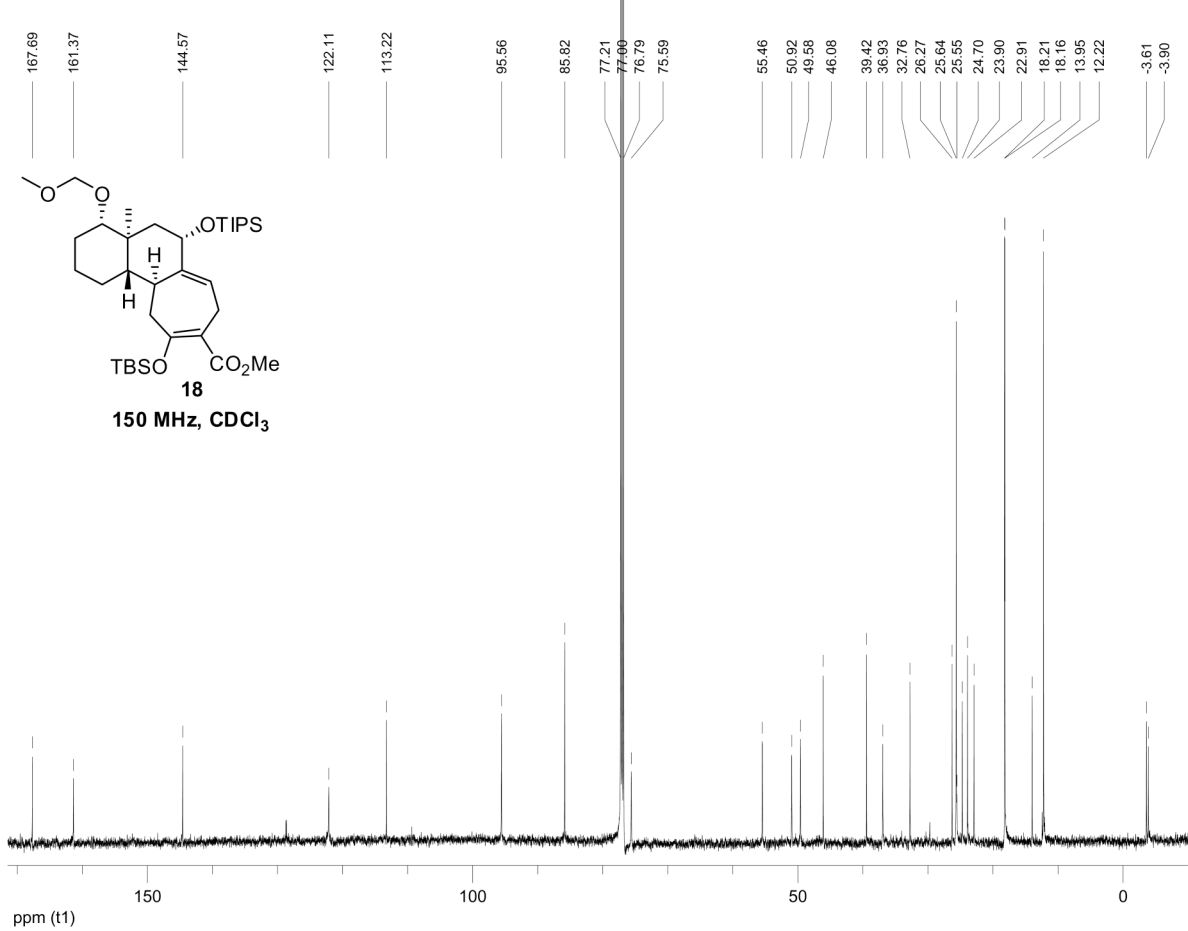

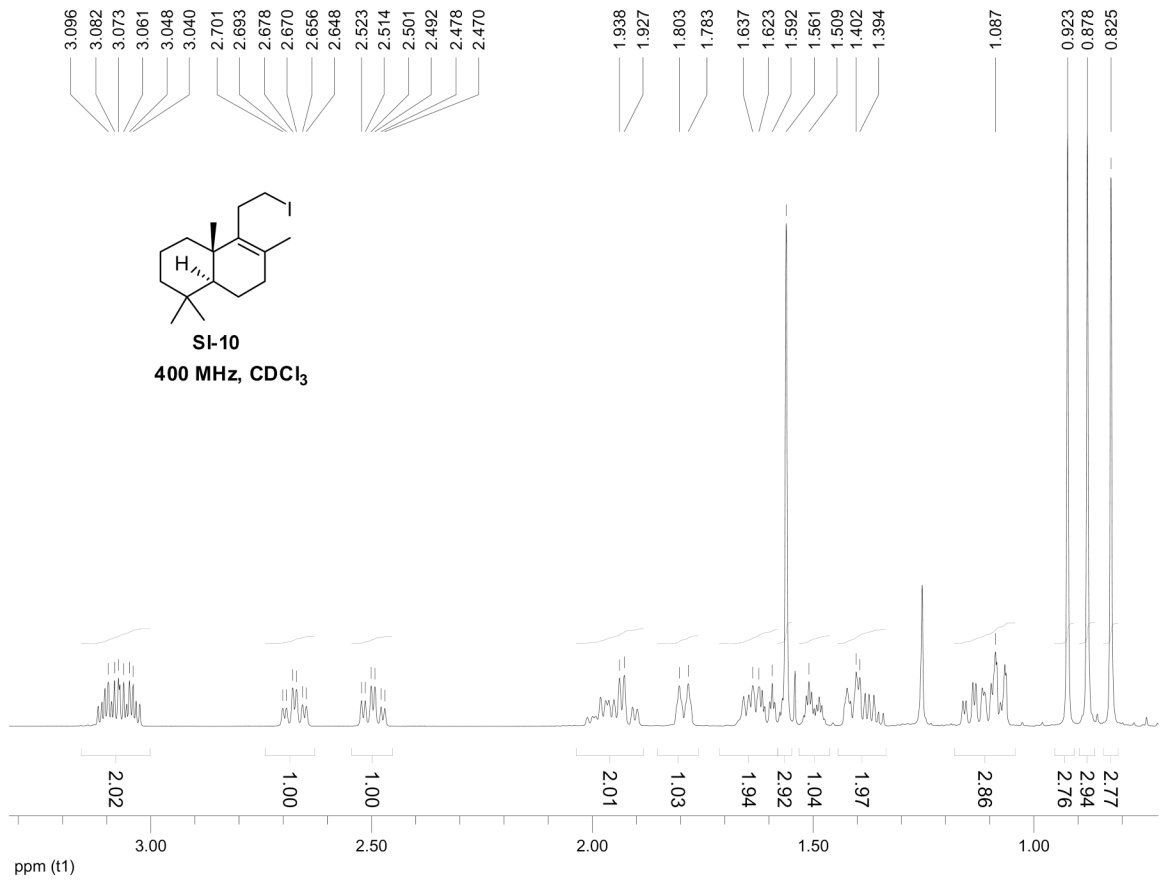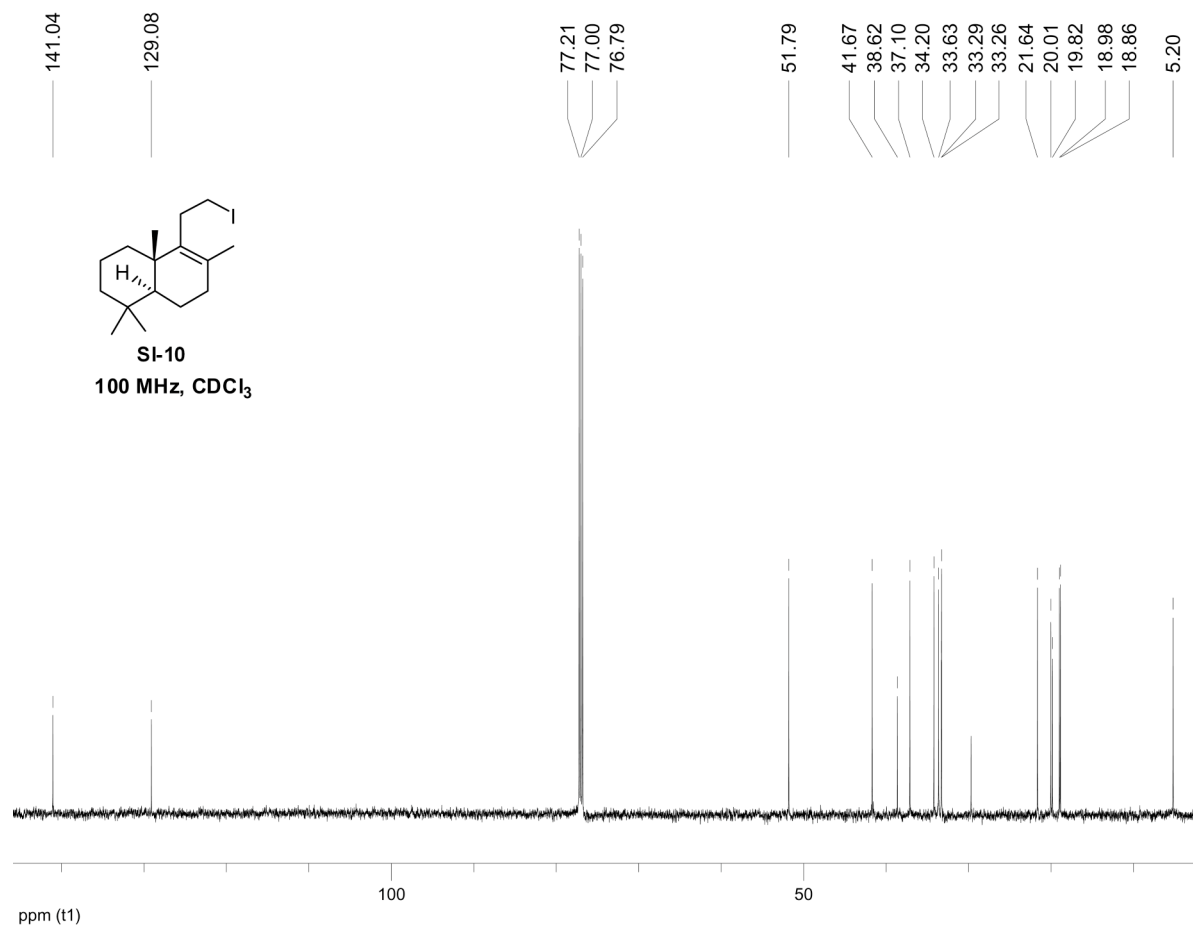



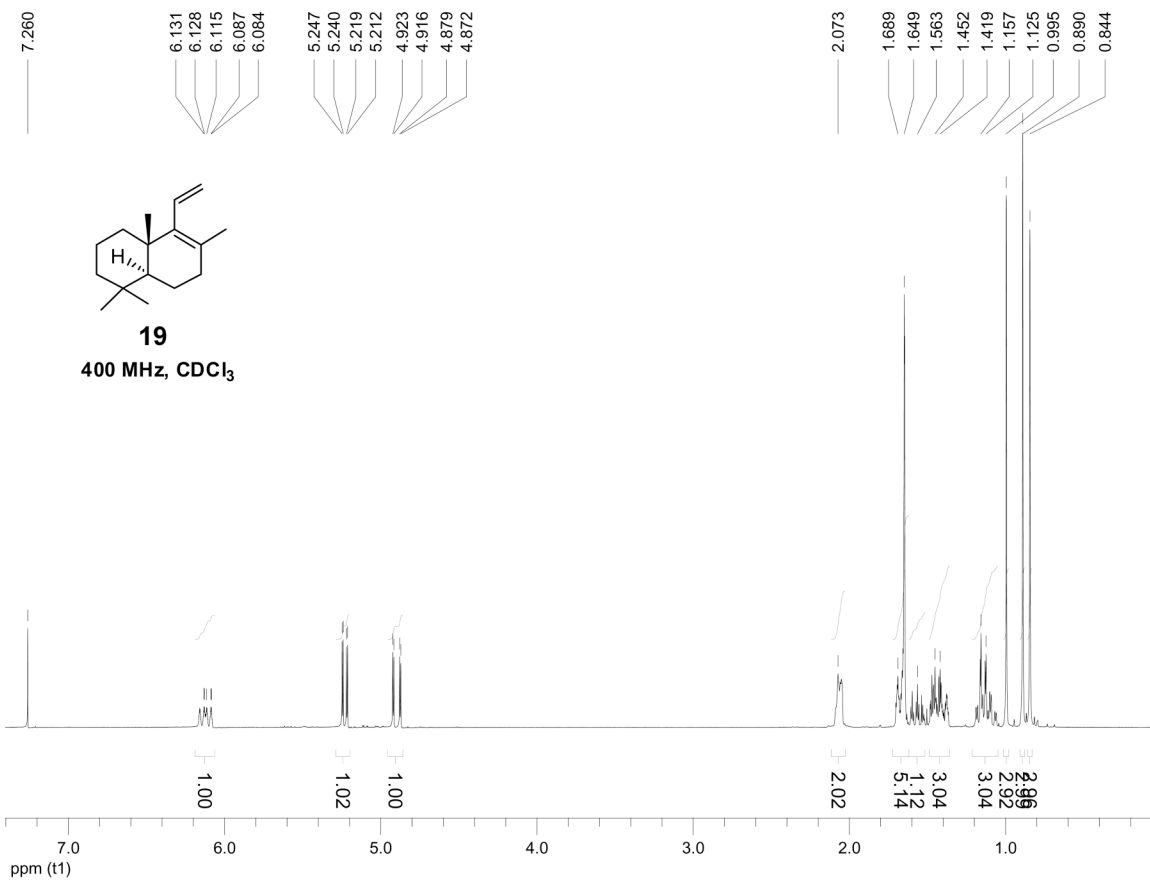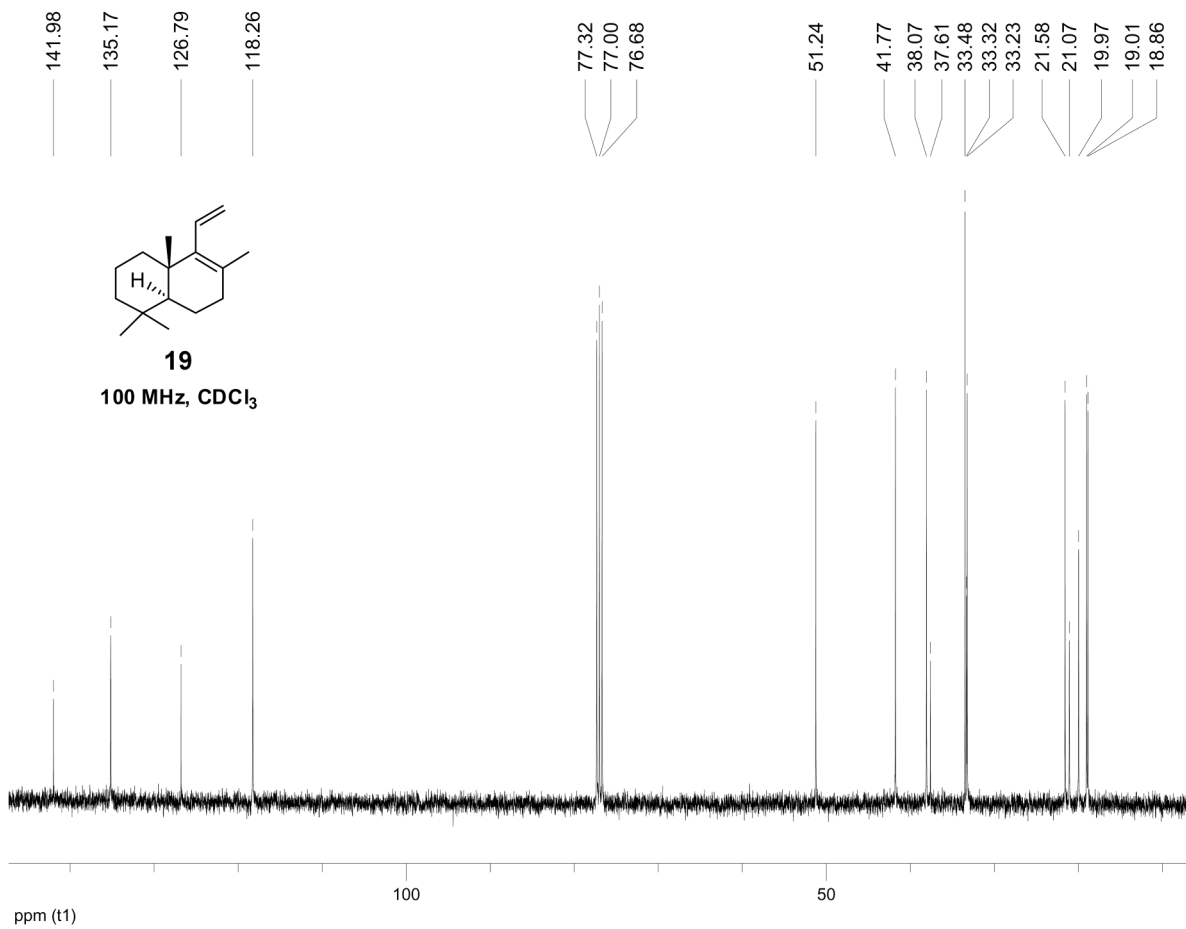



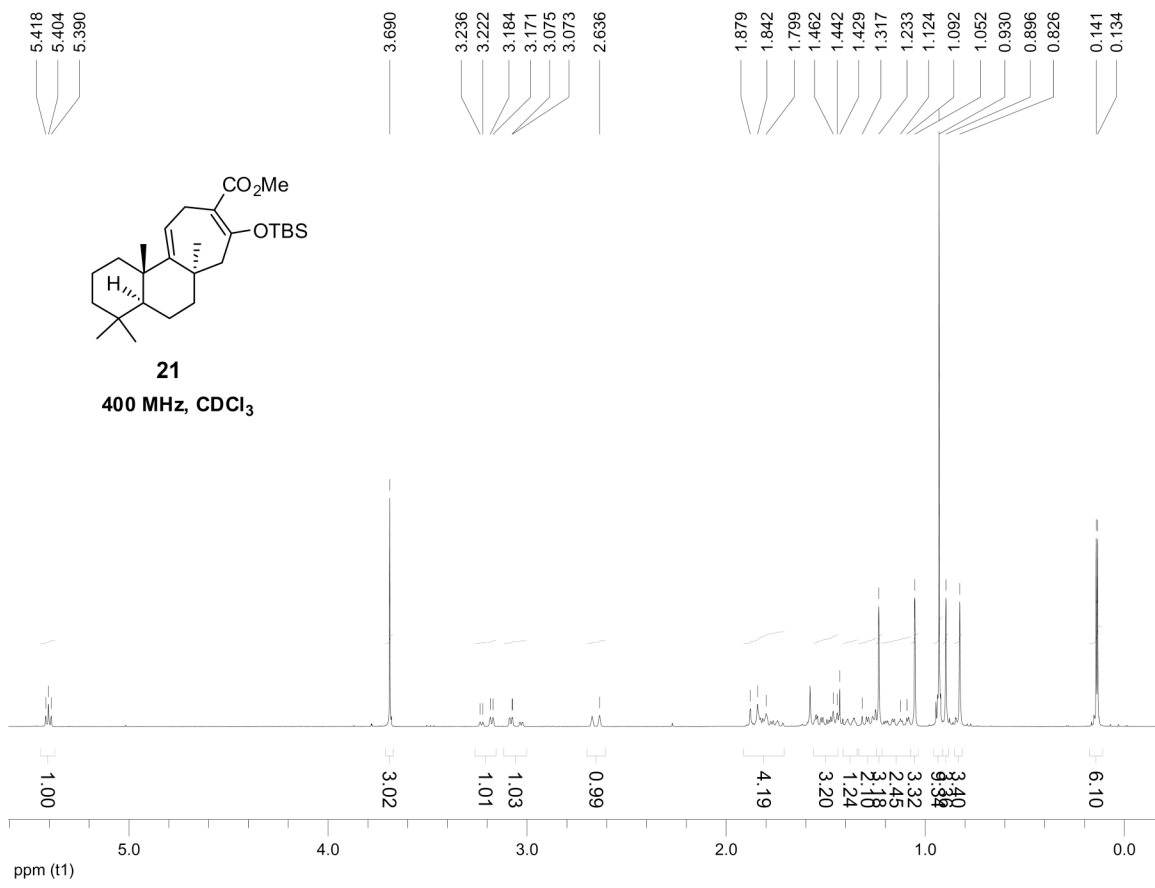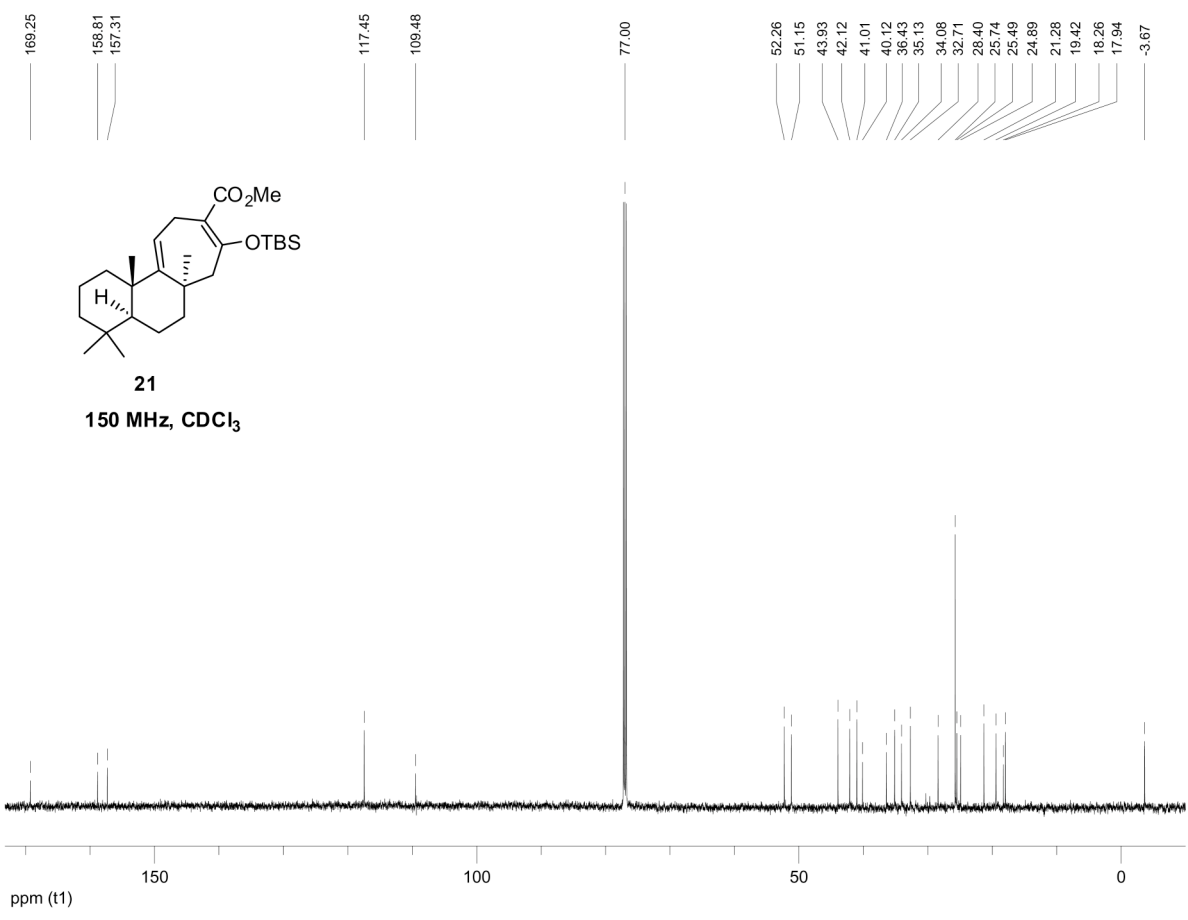

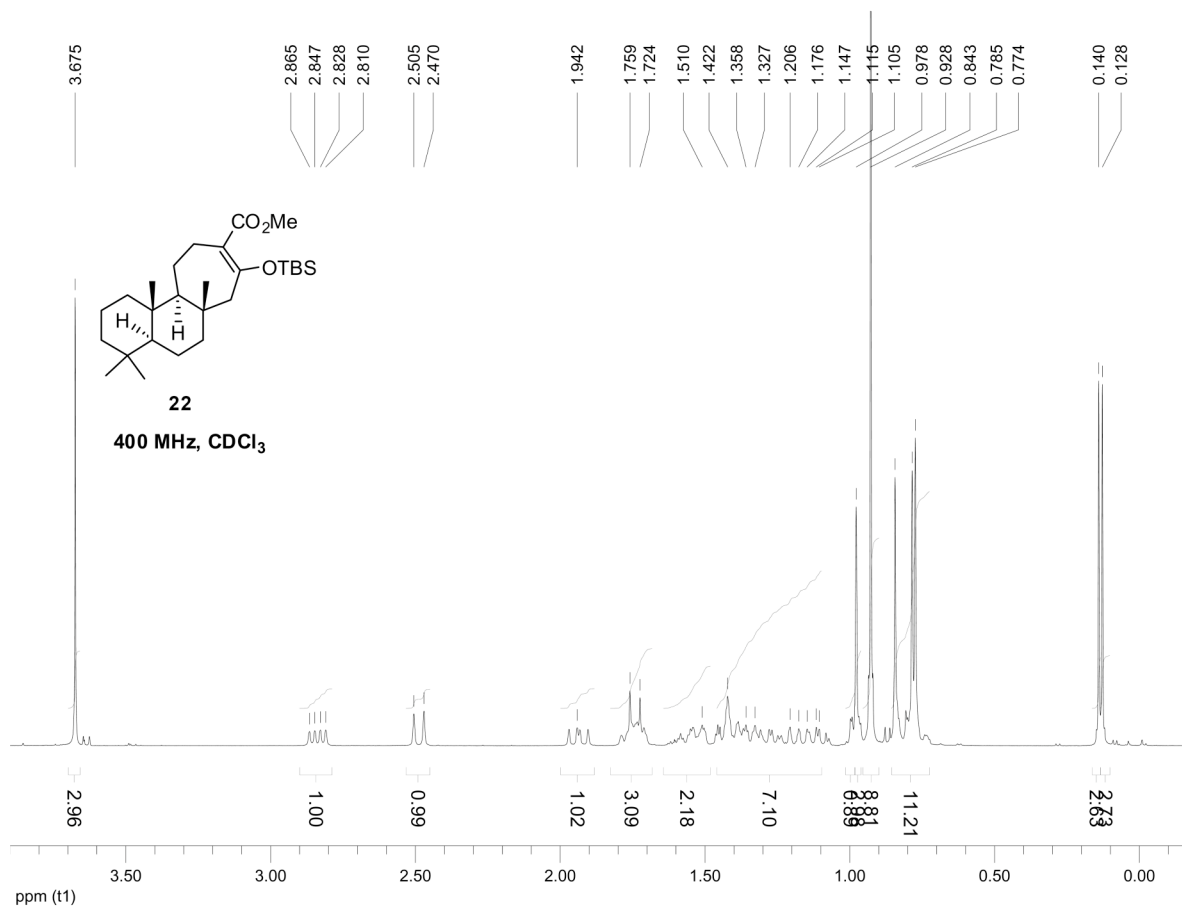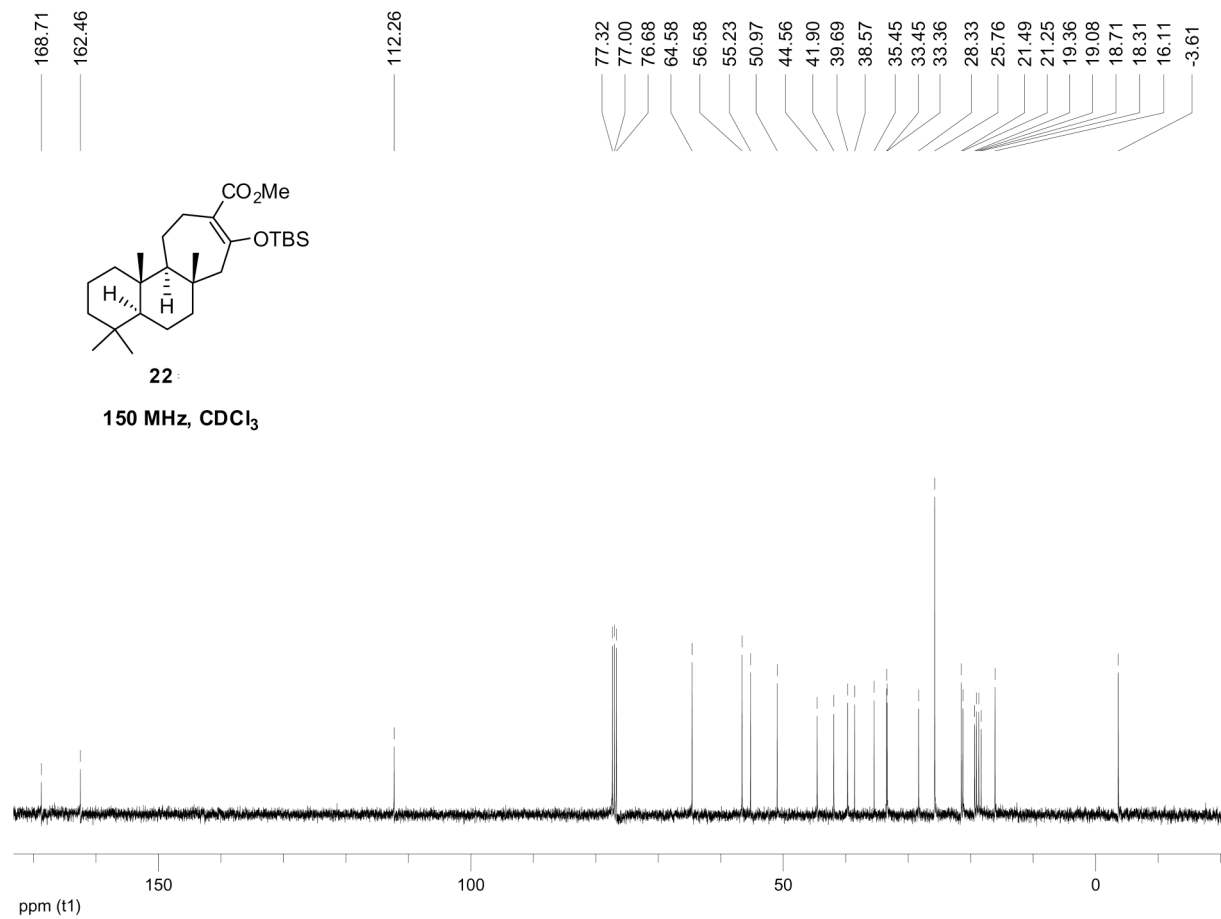

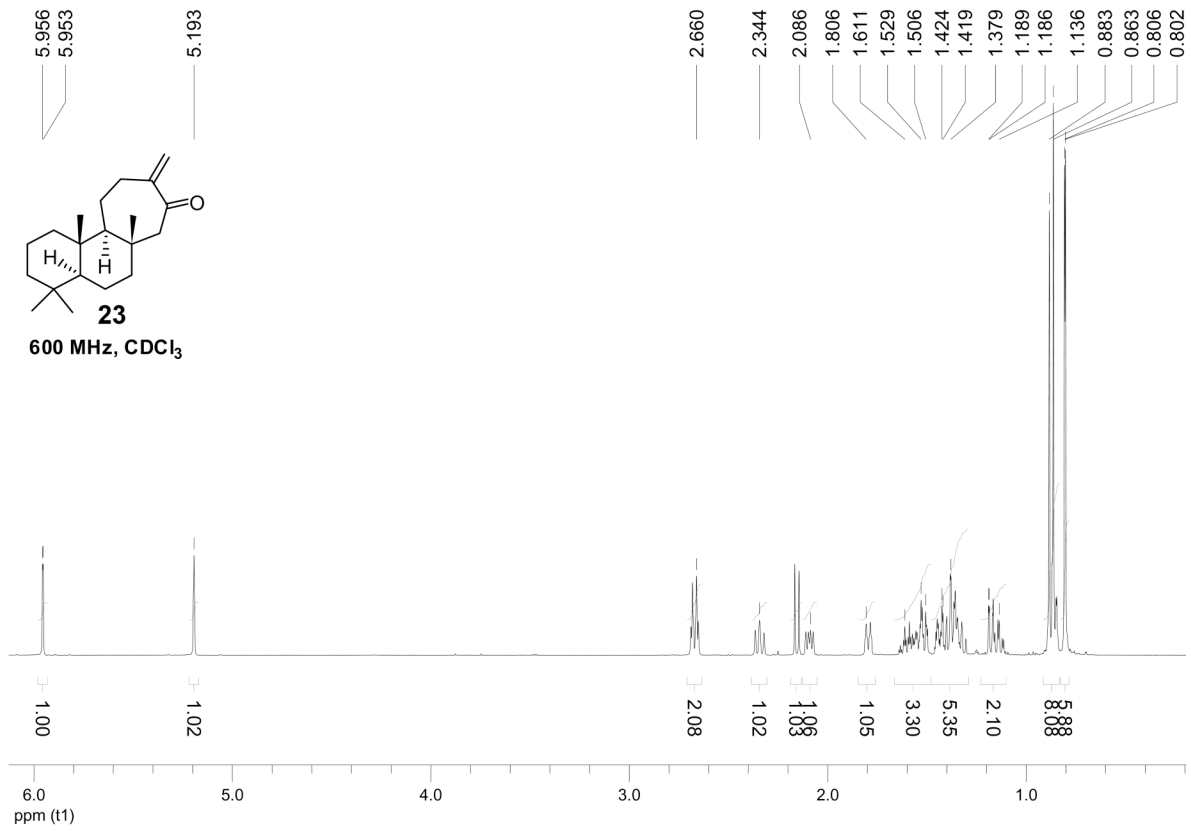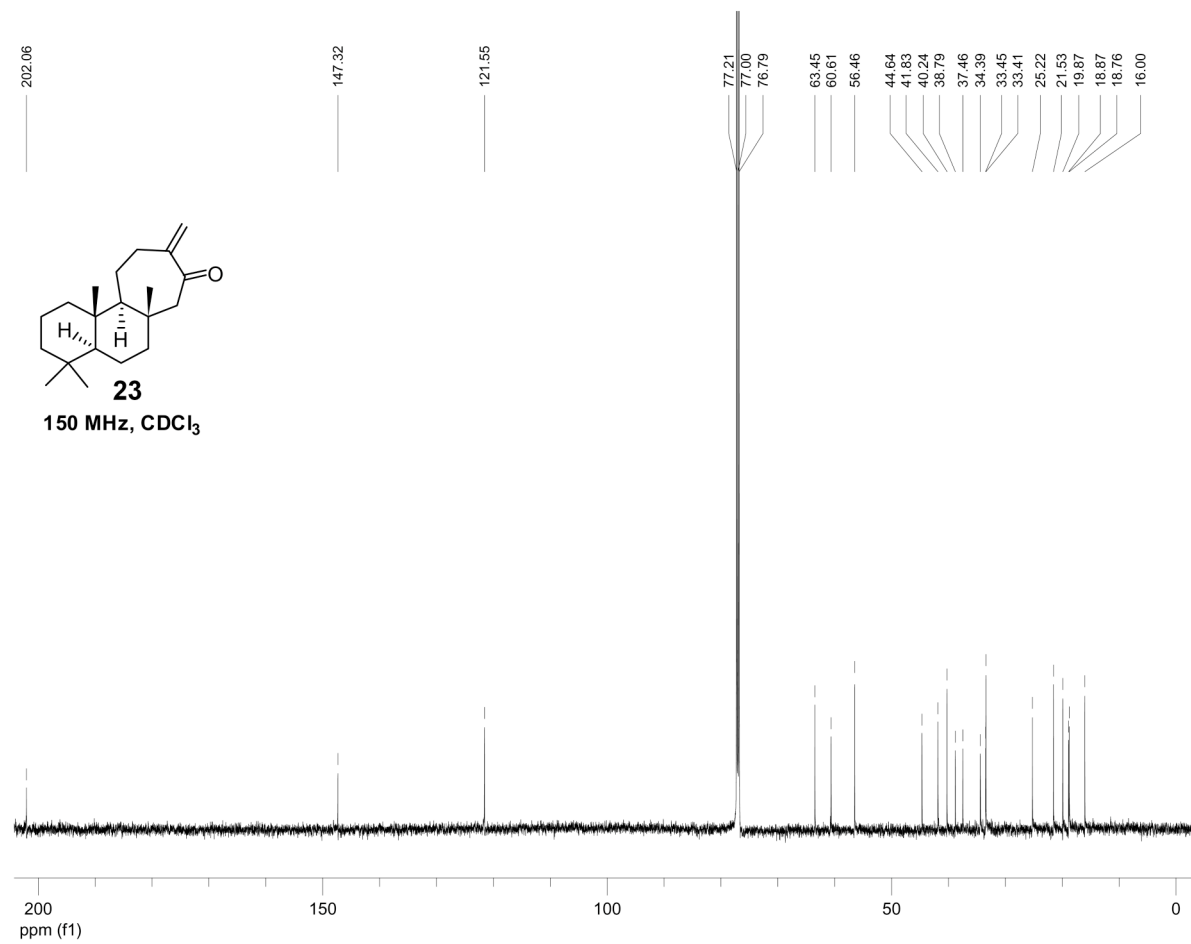

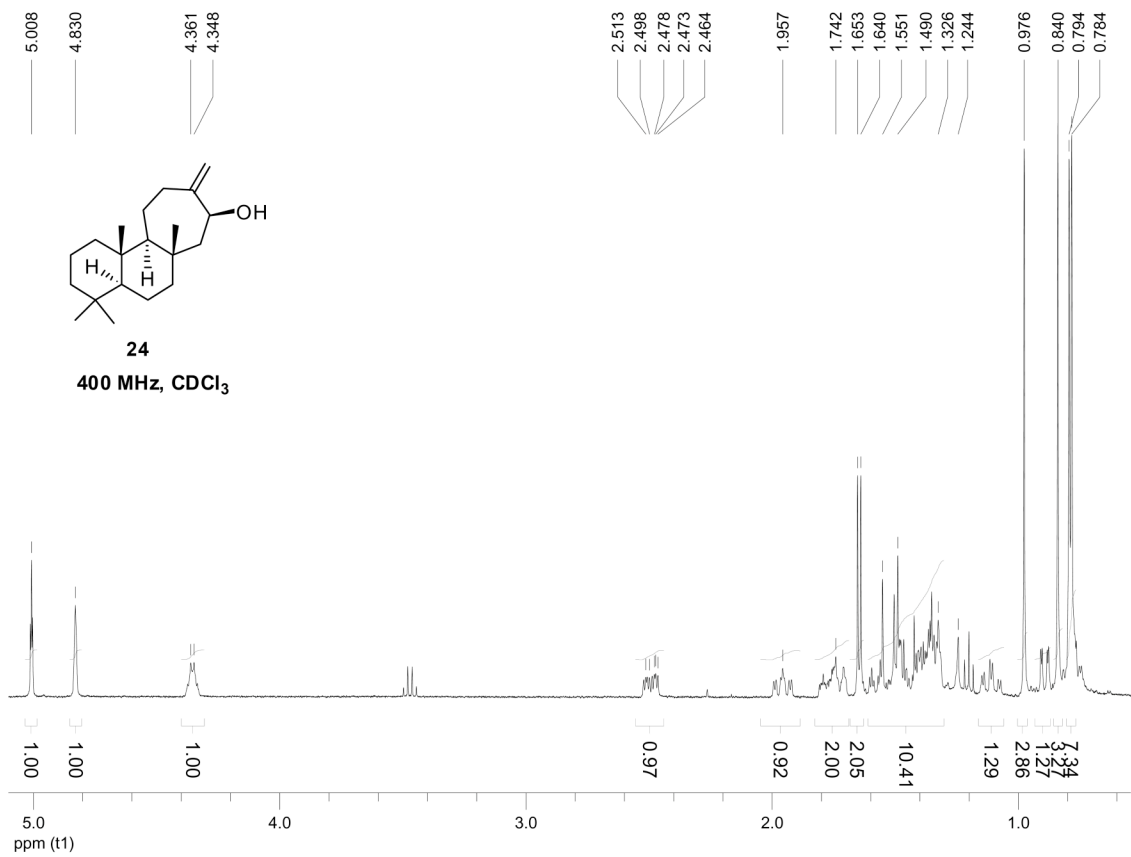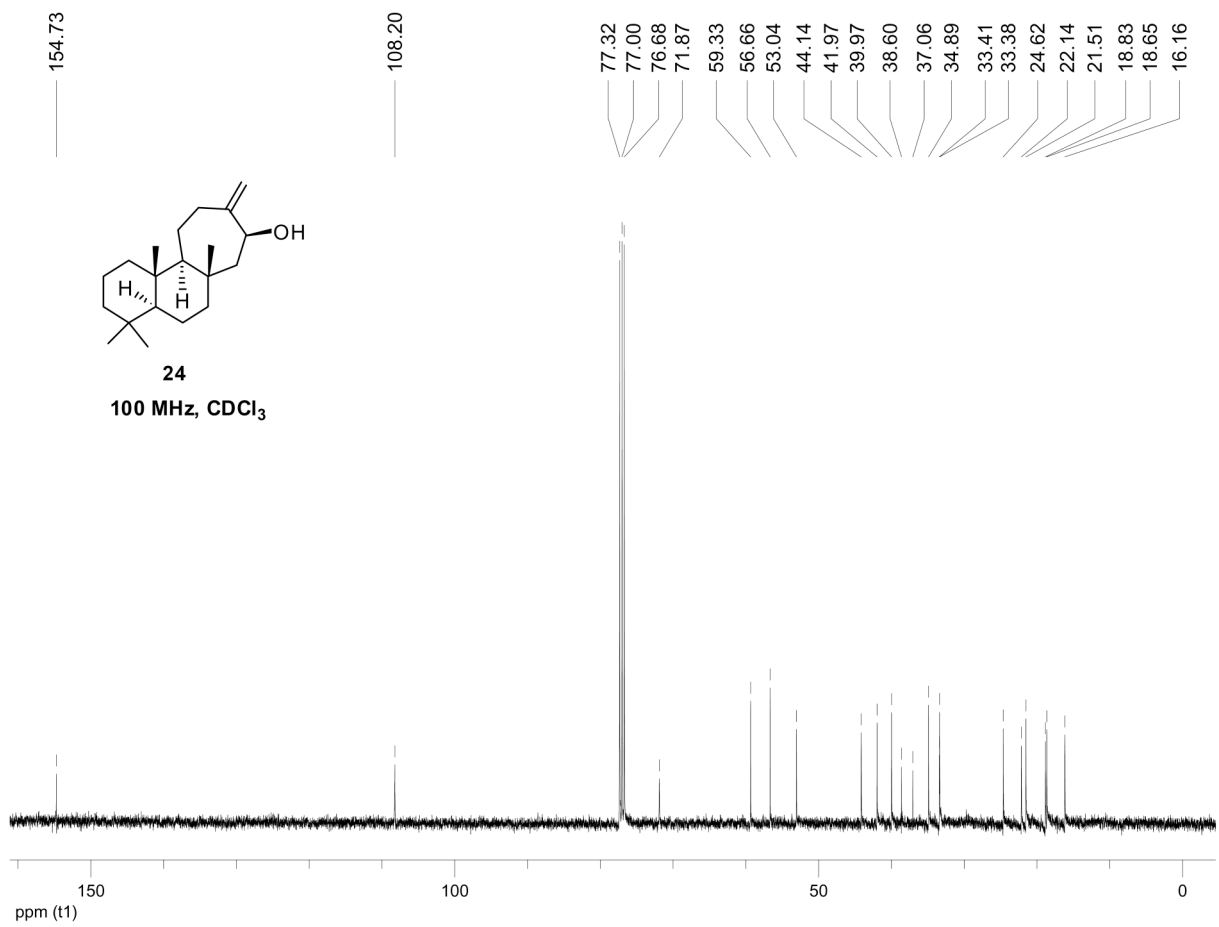

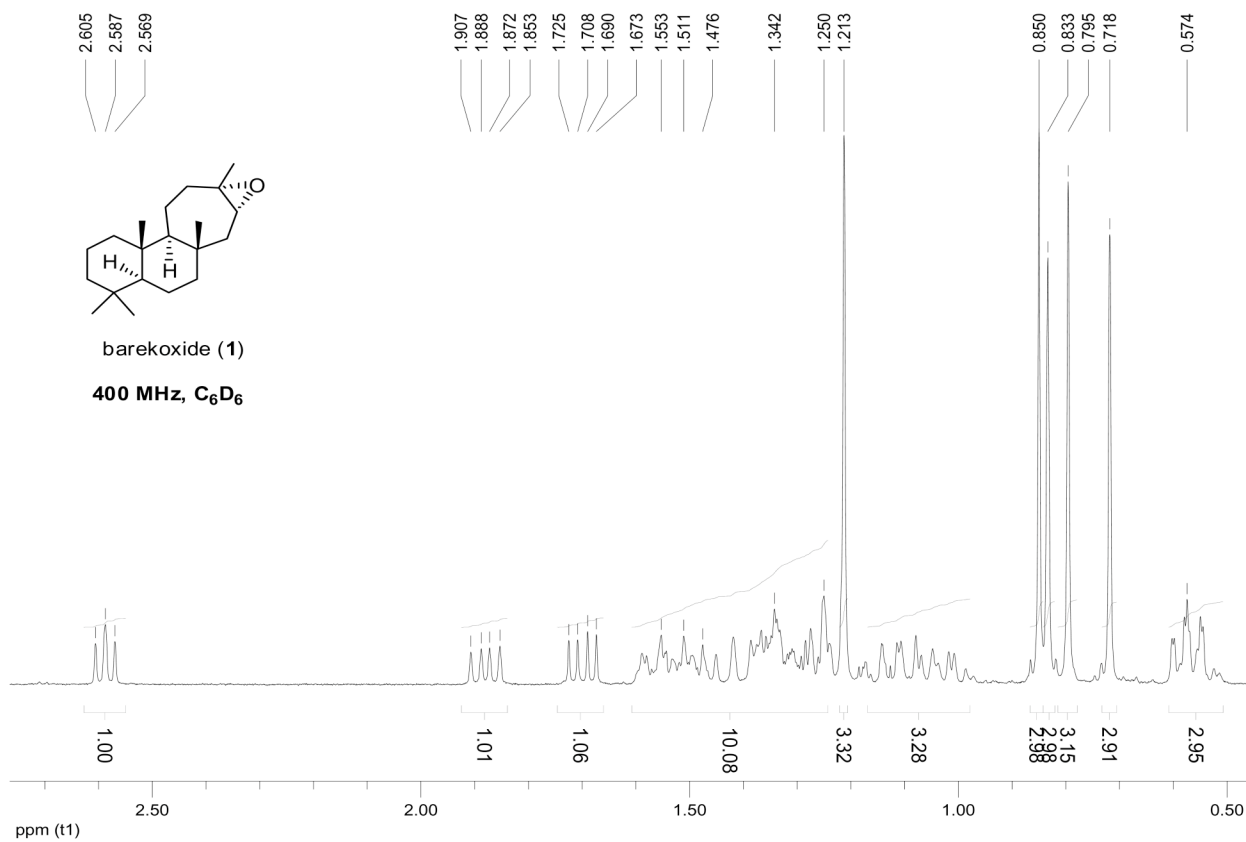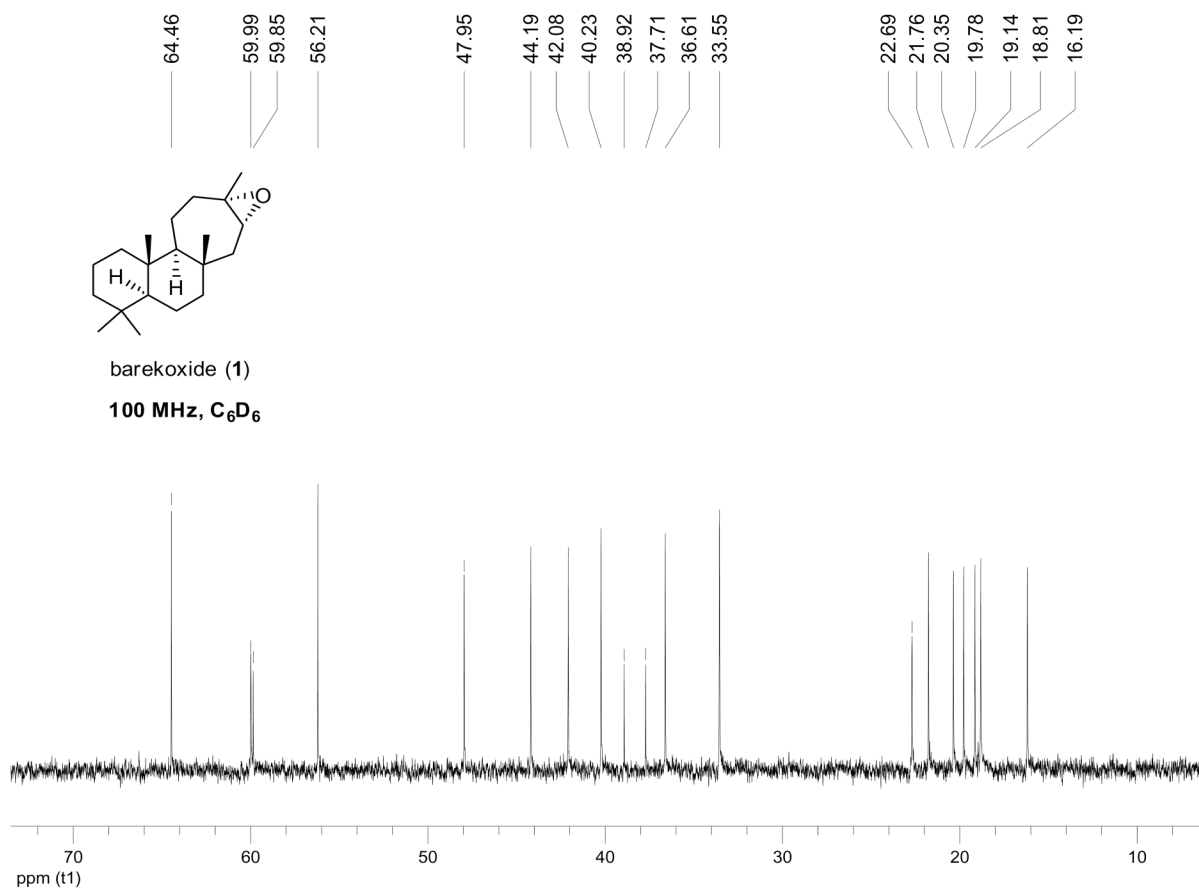

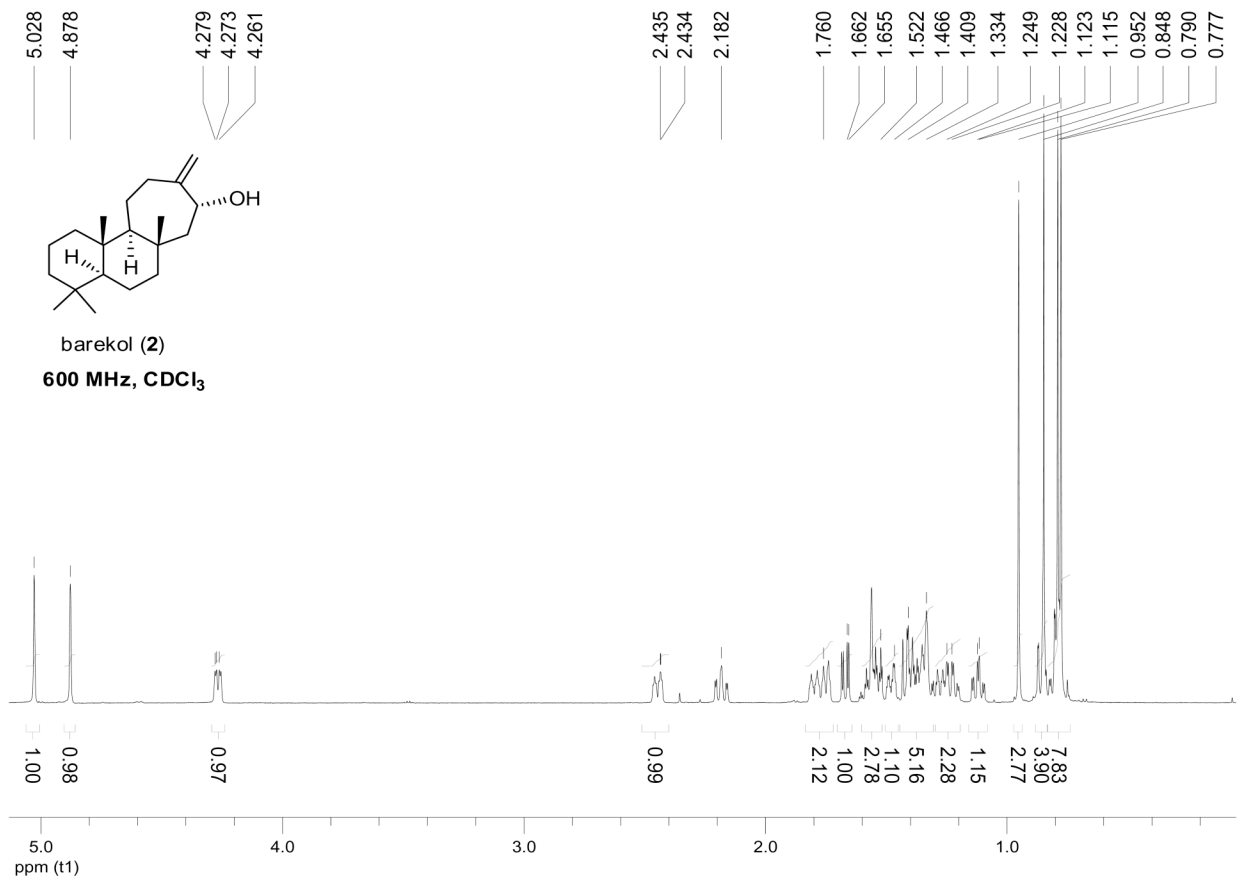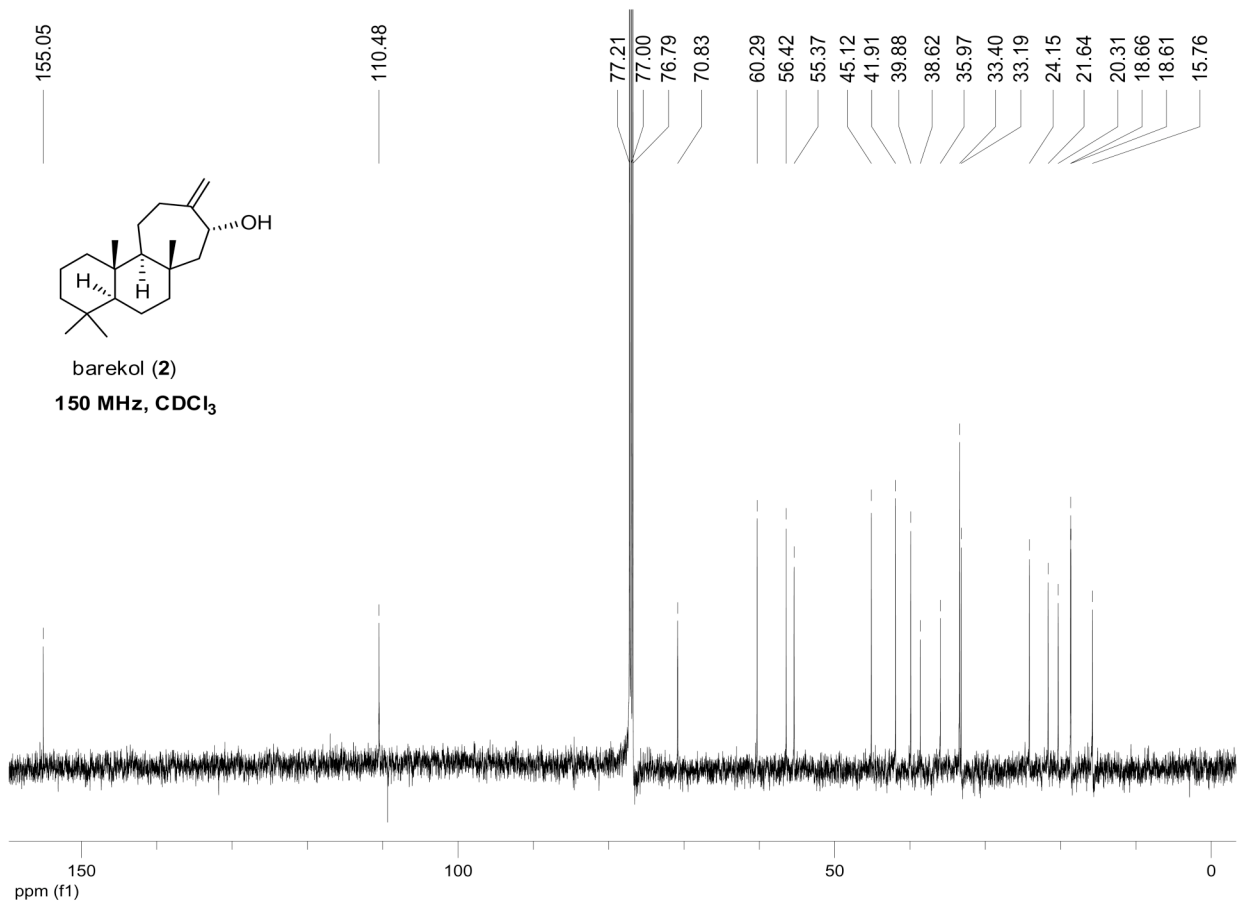



## Crystallographic Data of Barekol (2)

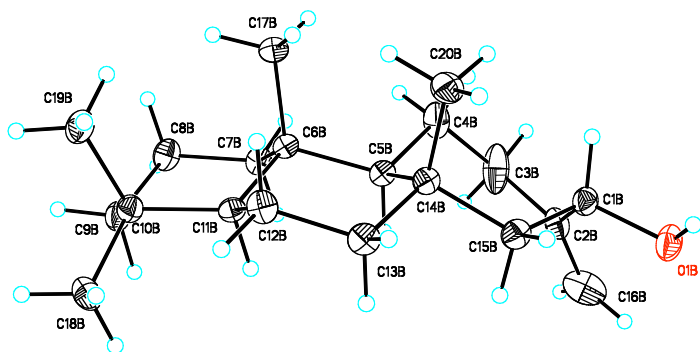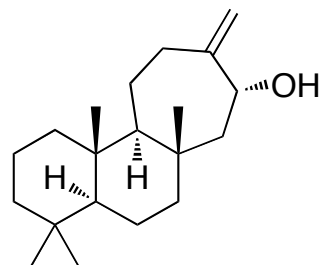

Barekol (2)

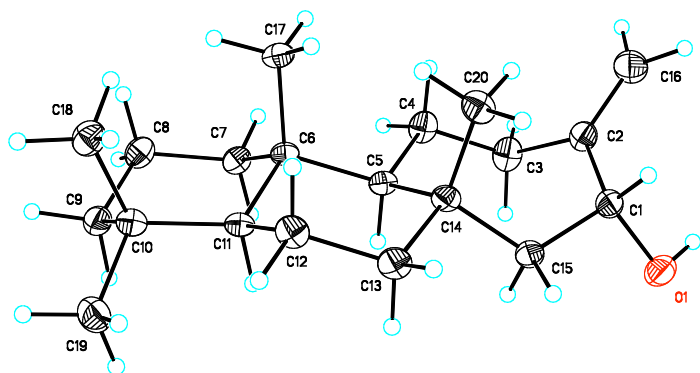

Table 1. Crystal data and structure refinement for Barekol (2).

|                                   |                                             |                              |
|-----------------------------------|---------------------------------------------|------------------------------|
| Identification code               | Barekol                                     |                              |
| Empirical formula                 | $C_{20}H_{34}O$                             |                              |
| Formula weight                    | 290.47                                      |                              |
| Temperature                       | 173(2) K                                    |                              |
| Wavelength                        | 1.54178 Å                                   |                              |
| Crystal system                    | Triclinic                                   |                              |
| Space group                       | P1                                          |                              |
| Unit cell dimensions              | a = 6.0927(2) Å                             | $\alpha = 80.027(2)^\circ$ . |
|                                   | b = 7.3057(3) Å                             | $\beta = 86.454(2)^\circ$ .  |
|                                   | c = 21.0808(8) Å                            | $\gamma = 67.354(2)^\circ$ . |
| Volume                            | 852.89(6) Å <sup>3</sup>                    |                              |
| Z                                 | 2                                           |                              |
| Density (calculated)              | 1.131 Mg/m <sup>3</sup>                     |                              |
| Absorption coefficient            | 0.498 mm <sup>-1</sup>                      |                              |
| F(000)                            | 324                                         |                              |
| Crystal size                      | 0.31 x 0.26 x 0.05 mm <sup>3</sup>          |                              |
| Theta range for data collection   | 2.13 to 65.87°.                             |                              |
| Index ranges                      | -6 ≤ h ≤ 7, -8 ≤ k ≤ 7, -24 ≤ l ≤ 24        |                              |
| Reflections collected             | 5328                                        |                              |
| Independent reflections           | 3290 [R(int) = 0.0131]                      |                              |
| Completeness to theta = 65.87°    | 84.1 %                                      |                              |
| Absorption correction             | Semi-empirical from equivalents             |                              |
| Max. and min. transmission        | 0.9755 and 0.8609                           |                              |
| Refinement method                 | Full-matrix least-squares on F <sup>2</sup> |                              |
| Data / restraints / parameters    | 3290 / 3 / 379                              |                              |
| Goodness-of-fit on F <sup>2</sup> | 1.040                                       |                              |
| Final R indices [I > 2σ(I)]       | R1 = 0.0389, wR2 = 0.1081                   |                              |
| R indices (all data)              | R1 = 0.0390, wR2 = 0.1082                   |                              |
| Absolute structure parameter      | 0.0(3)                                      |                              |
| Largest diff. peak and hole       | 0.239 and -0.232 e.Å <sup>-3</sup>          |                              |

Table 2. Atomic coordinates ( $\times 10^4$ ) and equivalent isotropic displacement parameters ( $\text{\AA}^2 \times 10^3$ ) for barekol (**2**).  $U(\text{eq})$  is defined as one third of the trace of the orthogonalized  $U^{ij}$  tensor.

|        | x        | y        | z        | $U(\text{eq})$ |
|--------|----------|----------|----------|----------------|
| C(1)   | 2486(5)  | 4224(4)  | 7135(1)  | 30(1)          |
| C(2)   | 4132(5)  | 2290(3)  | 6930(1)  | 30(1)          |
| C(3)   | 3246(5)  | 1522(4)  | 6428(1)  | 35(1)          |
| C(4)   | 3619(5)  | 2463(3)  | 5737(1)  | 31(1)          |
| C(5)   | 1968(4)  | 4662(3)  | 5497(1)  | 23(1)          |
| C(6)   | 2320(4)  | 5295(3)  | 4755(1)  | 22(1)          |
| C(7)   | 1808(5)  | 3857(3)  | 4377(1)  | 28(1)          |
| C(8)   | 1580(5)  | 4571(4)  | 3650(1)  | 32(1)          |
| C(9)   | -330(5)  | 6644(4)  | 3482(1)  | 31(1)          |
| C(10)  | 16(4)    | 8247(4)  | 3809(1)  | 27(1)          |
| C(11)  | 395(4)   | 7445(3)  | 4544(1)  | 24(1)          |
| C(12)  | 641(5)   | 8935(3)  | 4934(1)  | 29(1)          |
| C(13)  | 256(5)   | 8310(3)  | 5646(1)  | 30(1)          |
| C(14)  | 1968(4)  | 6195(3)  | 5939(1)  | 24(1)          |
| C(15)  | 863(4)   | 5743(3)  | 6601(1)  | 28(1)          |
| C(16)  | 6262(6)  | 1356(4)  | 7198(1)  | 43(1)          |
| C(17)  | 4880(4)  | 5157(4)  | 4604(1)  | 29(1)          |
| C(18)  | 2034(5)  | 8838(4)  | 3481(1)  | 34(1)          |
| C(19)  | -2278(5) | 10127(4) | 3703(1)  | 40(1)          |
| C(20)  | 4433(5)  | 6231(4)  | 6037(1)  | 31(1)          |
| O(1)   | 882(4)   | 3798(3)  | 7627(1)  | 44(1)          |
| C(1B)  | 6142(4)  | 6942(4)  | -1645(1) | 28(1)          |
| C(2B)  | 3762(5)  | 8572(4)  | -1543(1) | 31(1)          |
| C(3B)  | 3732(7)  | 9873(5)  | -1072(1) | 53(1)          |
| C(4B)  | 5579(6)  | 9036(4)  | -542(1)  | 37(1)          |
| C(5B)  | 5692(4)  | 7012(3)  | -139(1)  | 23(1)          |
| C(6B)  | 5963(4)  | 6939(3)  | 605(1)   | 22(1)          |
| C(7B)  | 3733(4)  | 8628(3)  | 825(1)   | 27(1)          |
| C(8B)  | 3524(5)  | 8448(4)  | 1563(1)  | 33(1)          |
| C(9B)  | 3478(4)  | 6415(4)  | 1864(1)  | 31(1)          |
| C(10B) | 5645(4)  | 4618(3)  | 1700(1)  | 27(1)          |
| C(11B) | 5931(4)  | 4885(3)  | 951(1)   | 23(1)          |
| C(12B) | 7962(5)  | 3144(3)  | 712(1)   | 29(1)          |

|        |          |         |          |       |
|--------|----------|---------|----------|-------|
| C(13B) | 7593(5)  | 3225(3) | -5(1)    | 29(1) |
| C(14B) | 7509(4)  | 5184(3) | -430(1)  | 24(1) |
| C(15B) | 6649(5)  | 5117(4) | -1101(1) | 29(1) |
| C(16B) | 1809(6)  | 8788(5) | -1840(2) | 53(1) |
| C(17B) | 8181(5)  | 7329(4) | 748(1)   | 31(1) |
| C(18B) | 5080(5)  | 2714(4) | 1921(1)  | 37(1) |
| C(19B) | 7847(5)  | 4367(4) | 2071(1)  | 35(1) |
| C(20B) | 10058(5) | 5147(4) | -502(1)  | 33(1) |
| O(1B)  | 6087(3)  | 6318(3) | -2247(1) | 37(1) |

---

Table 3. Bond lengths [Å] and angles [°] for barekol (2).

|            |          |              |          |
|------------|----------|--------------|----------|
|            |          | C(8)-H(8B)   | 0.9900   |
| C(1)-O(1)  | 1.457(3) | C(9)-C(10)   | 1.541(3) |
| C(1)-C(2)  | 1.502(3) | C(9)-H(9A)   | 0.9900   |
| C(1)-C(15) | 1.529(3) | C(9)-H(9B)   | 0.9900   |
| C(1)-H(1A) | 1.0000   | C(10)-C(19)  | 1.531(4) |
| C(2)-C(16) | 1.320(4) | C(10)-C(18)  | 1.541(3) |
| C(2)-C(3)  | 1.497(4) | C(10)-C(11)  | 1.557(3) |
| C(3)-C(4)  | 1.542(3) | C(11)-C(12)  | 1.528(3) |
| C(3)-H(3A) | 0.9900   | C(11)-H(11A) | 1.0000   |
| C(3)-H(3B) | 0.9900   | C(12)-C(13)  | 1.522(3) |
| C(4)-C(5)  | 1.544(3) | C(12)-H(12A) | 0.9900   |
| C(4)-H(4A) | 0.9900   | C(12)-H(12B) | 0.9900   |
| C(4)-H(4B) | 0.9900   | C(13)-C(14)  | 1.538(3) |
| C(5)-C(14) | 1.575(3) | C(13)-H(13A) | 0.9900   |
| C(5)-C(6)  | 1.579(3) | C(13)-H(13B) | 0.9900   |
| C(5)-H(5A) | 1.0000   | C(14)-C(20)  | 1.539(3) |
| C(6)-C(17) | 1.540(3) | C(14)-C(15)  | 1.551(3) |
| C(6)-C(7)  | 1.551(3) | C(15)-H(15A) | 0.9900   |
| C(6)-C(11) | 1.563(3) | C(15)-H(15B) | 0.9900   |
| C(7)-C(8)  | 1.529(3) | C(16)-H(16)  | 0.9348   |
| C(7)-H(7A) | 0.9900   | C(16)-H(16A) | 1.0393   |
| C(7)-H(7B) | 0.9900   | C(17)-H(17A) | 0.9800   |
| C(8)-C(9)  | 1.510(4) | C(17)-H(17B) | 0.9800   |
| C(8)-H(8A) | 0.9900   | C(17)-H(17C) | 0.9800   |

|               |          |                  |            |
|---------------|----------|------------------|------------|
| C(18)-H(18A)  | 0.9800   | C(10B)-C(18B)    | 1.547(3)   |
| C(18)-H(18B)  | 0.9800   | C(10B)-C(11B)    | 1.564(3)   |
| C(18)-H(18C)  | 0.9800   | C(11B)-C(12B)    | 1.529(3)   |
| C(19)-H(19A)  | 0.9800   | C(11B)-H(11B)    | 1.0000     |
| C(19)-H(19B)  | 0.9800   | C(12B)-C(13B)    | 1.528(3)   |
| C(19)-H(19C)  | 0.9800   | C(12B)-H(12C)    | 0.9900     |
| C(20)-H(20A)  | 0.9800   | C(12B)-H(12D)    | 0.9900     |
| C(20)-H(20B)  | 0.9800   | C(13B)-C(14B)    | 1.536(3)   |
| C(20)-H(20C)  | 0.9800   | C(13B)-H(13C)    | 0.9900     |
| O(1)-H(1O)    | 0.8178   | C(13B)-H(13D)    | 0.9900     |
| C(1B)-O(1B)   | 1.427(3) | C(14B)-C(20B)    | 1.541(3)   |
| C(1B)-C(2B)   | 1.512(3) | C(14B)-C(15B)    | 1.554(3)   |
| C(1B)-C(15B)  | 1.544(3) | C(15B)-H(15C)    | 0.9900     |
| C(1B)-H(1BA)  | 1.0000   | C(15B)-H(15D)    | 0.9900     |
| C(2B)-C(16B)  | 1.320(5) | C(16B)-H(16B)    | 0.8774     |
| C(2B)-C(3B)   | 1.485(4) | C(16B)-H(16C)    | 0.9830     |
| C(3B)-C(4B)   | 1.509(4) | C(17B)-H(17D)    | 0.9800     |
| C(3B)-H(3B1)  | 0.9900   | C(17B)-H(17E)    | 0.9800     |
| C(3B)-H(3B2)  | 0.9900   | C(17B)-H(17F)    | 0.9800     |
| C(4B)-C(5B)   | 1.552(3) | C(18B)-H(18D)    | 0.9800     |
| C(4B)-H(4BA)  | 0.9900   | C(18B)-H(18E)    | 0.9800     |
| C(4B)-H(4BB)  | 0.9900   | C(18B)-H(18F)    | 0.9800     |
| C(5B)-C(14B)  | 1.564(3) | C(19B)-H(19D)    | 0.9800     |
| C(5B)-C(6B)   | 1.577(3) | C(19B)-H(19E)    | 0.9800     |
| C(5B)-H(5BA)  | 1.0000   | C(19B)-H(19F)    | 0.9800     |
| C(6B)-C(17B)  | 1.540(3) | C(20B)-H(20D)    | 0.9800     |
| C(6B)-C(7B)   | 1.553(3) | C(20B)-H(20E)    | 0.9800     |
| C(6B)-C(11B)  | 1.557(3) | C(20B)-H(20F)    | 0.9800     |
| C(7B)-C(8B)   | 1.540(3) | O(1B)-H(1BB)     | 0.8400     |
| C(7B)-H(7BA)  | 0.9900   |                  |            |
| C(7B)-H(7BB)  | 0.9900   |                  |            |
| C(8B)-C(9B)   | 1.521(4) | O(1)-C(1)-C(2)   | 109.14(19) |
| C(8B)-H(8BA)  | 0.9900   | O(1)-C(1)-C(15)  | 105.1(2)   |
| C(8B)-H(8BB)  | 0.9900   | C(2)-C(1)-C(15)  | 114.6(2)   |
| C(9B)-C(10B)  | 1.533(3) | O(1)-C(1)-H(1A)  | 109.3      |
| C(9B)-H(9BA)  | 0.9900   | C(2)-C(1)-H(1A)  | 109.3      |
| C(9B)-H(9BB)  | 0.9900   | C(15)-C(1)-H(1A) | 109.3      |
| C(10B)-C(19B) | 1.528(4) | C(16)-C(2)-C(3)  | 123.4(2)   |

|                  |            |                     |            |
|------------------|------------|---------------------|------------|
| C(16)-C(2)-C(1)  | 119.2(2)   | C(8)-C(9)-C(10)     | 113.8(2)   |
| C(3)-C(2)-C(1)   | 117.4(2)   | C(8)-C(9)-H(9A)     | 108.8      |
| C(2)-C(3)-C(4)   | 112.70(19) | C(10)-C(9)-H(9A)    | 108.8      |
| C(2)-C(3)-H(3A)  | 109.1      | C(8)-C(9)-H(9B)     | 108.8      |
| C(4)-C(3)-H(3A)  | 109.1      | C(10)-C(9)-H(9B)    | 108.8      |
| C(2)-C(3)-H(3B)  | 109.1      | H(9A)-C(9)-H(9B)    | 107.7      |
| C(4)-C(3)-H(3B)  | 109.1      | C(19)-C(10)-C(9)    | 107.2(2)   |
| H(3A)-C(3)-H(3B) | 107.8      | C(19)-C(10)-C(18)   | 107.0(2)   |
| C(3)-C(4)-C(5)   | 117.6(2)   | C(9)-C(10)-C(18)    | 110.54(18) |
| C(3)-C(4)-H(4A)  | 107.9      | C(19)-C(10)-C(11)   | 109.13(19) |
| C(5)-C(4)-H(4A)  | 107.9      | C(9)-C(10)-C(11)    | 108.47(18) |
| C(3)-C(4)-H(4B)  | 107.9      | C(18)-C(10)-C(11)   | 114.2(2)   |
| C(5)-C(4)-H(4B)  | 107.9      | C(12)-C(11)-C(10)   | 114.01(18) |
| H(4A)-C(4)-H(4B) | 107.2      | C(12)-C(11)-C(6)    | 110.72(19) |
| C(4)-C(5)-C(14)  | 114.24(18) | C(10)-C(11)-C(6)    | 117.57(17) |
| C(4)-C(5)-C(6)   | 111.28(17) | C(12)-C(11)-H(11A)  | 104.3      |
| C(14)-C(5)-C(6)  | 115.33(16) | C(10)-C(11)-H(11A)  | 104.3      |
| C(4)-C(5)-H(5A)  | 104.9      | C(6)-C(11)-H(11A)   | 104.3      |
| C(14)-C(5)-H(5A) | 104.9      | C(13)-C(12)-C(11)   | 110.02(17) |
| C(6)-C(5)-H(5A)  | 104.9      | C(13)-C(12)-H(12A)  | 109.7      |
| C(17)-C(6)-C(7)  | 108.19(17) | C(11)-C(12)-H(12A)  | 109.7      |
| C(17)-C(6)-C(11) | 113.40(17) | C(13)-C(12)-H(12B)  | 109.7      |
| C(7)-C(6)-C(11)  | 107.15(19) | C(11)-C(12)-H(12B)  | 109.7      |
| C(17)-C(6)-C(5)  | 111.74(19) | H(12A)-C(12)-H(12B) | 108.2      |
| C(7)-C(6)-C(5)   | 108.83(16) | C(12)-C(13)-C(14)   | 114.79(18) |
| C(11)-C(6)-C(5)  | 107.35(16) | C(12)-C(13)-H(13A)  | 108.6      |
| C(8)-C(7)-C(6)   | 113.65(18) | C(14)-C(13)-H(13A)  | 108.6      |
| C(8)-C(7)-H(7A)  | 108.8      | C(12)-C(13)-H(13B)  | 108.6      |
| C(6)-C(7)-H(7A)  | 108.8      | C(14)-C(13)-H(13B)  | 108.6      |
| C(8)-C(7)-H(7B)  | 108.8      | H(13A)-C(13)-H(13B) | 107.5      |
| C(6)-C(7)-H(7B)  | 108.8      | C(20)-C(14)-C(13)   | 109.48(19) |
| H(7A)-C(7)-H(7B) | 107.7      | C(20)-C(14)-C(15)   | 109.9(2)   |
| C(9)-C(8)-C(7)   | 111.81(19) | C(13)-C(14)-C(15)   | 104.41(18) |
| C(9)-C(8)-H(8A)  | 109.3      | C(20)-C(14)-C(5)    | 114.34(18) |
| C(7)-C(8)-H(8A)  | 109.3      | C(13)-C(14)-C(5)    | 108.63(18) |
| C(9)-C(8)-H(8B)  | 109.3      | C(15)-C(14)-C(5)    | 109.56(16) |
| C(7)-C(8)-H(8B)  | 109.3      | C(1)-C(15)-C(14)    | 118.8(2)   |
| H(8A)-C(8)-H(8B) | 107.9      | C(1)-C(15)-H(15A)   | 107.6      |

|                     |            |                     |            |
|---------------------|------------|---------------------|------------|
| C(14)-C(15)-H(15A)  | 107.6      | C(16B)-C(2B)-C(3B)  | 121.8(3)   |
| C(1)-C(15)-H(15B)   | 107.6      | C(16B)-C(2B)-C(1B)  | 122.2(2)   |
| C(14)-C(15)-H(15B)  | 107.6      | C(3B)-C(2B)-C(1B)   | 116.0(3)   |
| H(15A)-C(15)-H(15B) | 107.1      | C(2B)-C(3B)-C(4B)   | 118.6(2)   |
| C(2)-C(16)-H(16)    | 125.5      | C(2B)-C(3B)-H(3B1)  | 107.7      |
| C(2)-C(16)-H(16A)   | 124.1      | C(4B)-C(3B)-H(3B1)  | 107.7      |
| H(16)-C(16)-H(16A)  | 110.4      | C(2B)-C(3B)-H(3B2)  | 107.7      |
| C(6)-C(17)-H(17A)   | 109.5      | C(4B)-C(3B)-H(3B2)  | 107.7      |
| C(6)-C(17)-H(17B)   | 109.5      | H(3B1)-C(3B)-H(3B2) | 107.1      |
| H(17A)-C(17)-H(17B) | 109.5      | C(3B)-C(4B)-C(5B)   | 114.3(2)   |
| C(6)-C(17)-H(17C)   | 109.5      | C(3B)-C(4B)-H(4BA)  | 108.7      |
| H(17A)-C(17)-H(17C) | 109.5      | C(5B)-C(4B)-H(4BA)  | 108.7      |
| H(17B)-C(17)-H(17C) | 109.5      | C(3B)-C(4B)-H(4BB)  | 108.7      |
| C(10)-C(18)-H(18A)  | 109.5      | C(5B)-C(4B)-H(4BB)  | 108.7      |
| C(10)-C(18)-H(18B)  | 109.5      | H(4BA)-C(4B)-H(4BB) | 107.6      |
| H(18A)-C(18)-H(18B) | 109.5      | C(4B)-C(5B)-C(14B)  | 111.28(17) |
| C(10)-C(18)-H(18C)  | 109.5      | C(4B)-C(5B)-C(6B)   | 112.40(17) |
| H(18A)-C(18)-H(18C) | 109.5      | C(14B)-C(5B)-C(6B)  | 115.77(18) |
| H(18B)-C(18)-H(18C) | 109.5      | C(4B)-C(5B)-H(5BA)  | 105.5      |
| C(10)-C(19)-H(19A)  | 109.5      | C(14B)-C(5B)-H(5BA) | 105.5      |
| C(10)-C(19)-H(19B)  | 109.5      | C(6B)-C(5B)-H(5BA)  | 105.5      |
| H(19A)-C(19)-H(19B) | 109.5      | C(17B)-C(6B)-C(7B)  | 108.32(18) |
| C(10)-C(19)-H(19C)  | 109.5      | C(17B)-C(6B)-C(11B) | 114.60(19) |
| H(19A)-C(19)-H(19C) | 109.5      | C(7B)-C(6B)-C(11B)  | 107.75(17) |
| H(19B)-C(19)-H(19C) | 109.5      | C(17B)-C(6B)-C(5B)  | 111.23(18) |
| C(14)-C(20)-H(20A)  | 109.5      | C(7B)-C(6B)-C(5B)   | 107.74(18) |
| C(14)-C(20)-H(20B)  | 109.5      | C(11B)-C(6B)-C(5B)  | 106.96(15) |
| H(20A)-C(20)-H(20B) | 109.5      | C(8B)-C(7B)-C(6B)   | 112.79(19) |
| C(14)-C(20)-H(20C)  | 109.5      | C(8B)-C(7B)-H(7BA)  | 109.0      |
| H(20A)-C(20)-H(20C) | 109.5      | C(6B)-C(7B)-H(7BA)  | 109.0      |
| H(20B)-C(20)-H(20C) | 109.5      | C(8B)-C(7B)-H(7BB)  | 109.0      |
| C(1)-O(1)-H(10)     | 102.9      | C(6B)-C(7B)-H(7BB)  | 109.0      |
| O(1B)-C(1B)-C(2B)   | 108.7(2)   | H(7BA)-C(7B)-H(7BB) | 107.8      |
| O(1B)-C(1B)-C(15B)  | 109.05(19) | C(9B)-C(8B)-C(7B)   | 110.93(18) |
| C(2B)-C(1B)-C(15B)  | 110.45(18) | C(9B)-C(8B)-H(8BA)  | 109.5      |
| O(1B)-C(1B)-H(1BA)  | 109.5      | C(7B)-C(8B)-H(8BA)  | 109.5      |
| C(2B)-C(1B)-H(1BA)  | 109.5      | C(9B)-C(8B)-H(8BB)  | 109.5      |
| C(15B)-C(1B)-H(1BA) | 109.5      | C(7B)-C(8B)-H(8BB)  | 109.5      |

|                      |            |                      |            |
|----------------------|------------|----------------------|------------|
| H(8BA)-C(8B)-H(8BB)  | 108.0      | C(1B)-C(15B)-C(14B)  | 120.10(18) |
| C(8B)-C(9B)-C(10B)   | 114.08(19) | C(1B)-C(15B)-H(15C)  | 107.3      |
| C(8B)-C(9B)-H(9BA)   | 108.7      | C(14B)-C(15B)-H(15C) | 107.3      |
| C(10B)-C(9B)-H(9BA)  | 108.7      | C(1B)-C(15B)-H(15D)  | 107.3      |
| C(8B)-C(9B)-H(9BB)   | 108.7      | C(14B)-C(15B)-H(15D) | 107.3      |
| C(10B)-C(9B)-H(9BB)  | 108.7      | H(15C)-C(15B)-H(15D) | 106.9      |
| H(9BA)-C(9B)-H(9BB)  | 107.6      | C(2B)-C(16B)-H(16B)  | 126.2      |
| C(19B)-C(10B)-C(9B)  | 111.0(2)   | C(2B)-C(16B)-H(16C)  | 112.2      |
| C(19B)-C(10B)-C(18B) | 107.7(2)   | H(16B)-C(16B)-H(16C) | 121.4      |
| C(9B)-C(10B)-C(18B)  | 107.21(19) | C(6B)-C(17B)-H(17D)  | 109.5      |
| C(19B)-C(10B)-C(11B) | 114.57(18) | C(6B)-C(17B)-H(17E)  | 109.5      |
| C(9B)-C(10B)-C(11B)  | 108.05(18) | H(17D)-C(17B)-H(17E) | 109.5      |
| C(18B)-C(10B)-C(11B) | 108.05(17) | C(6B)-C(17B)-H(17F)  | 109.5      |
| C(12B)-C(11B)-C(6B)  | 110.60(17) | H(17D)-C(17B)-H(17F) | 109.5      |
| C(12B)-C(11B)-C(10B) | 114.12(19) | H(17E)-C(17B)-H(17F) | 109.5      |
| C(6B)-C(11B)-C(10B)  | 116.98(17) | C(10B)-C(18B)-H(18D) | 109.5      |
| C(12B)-C(11B)-H(11B) | 104.6      | C(10B)-C(18B)-H(18E) | 109.5      |
| C(6B)-C(11B)-H(11B)  | 104.6      | H(18D)-C(18B)-H(18E) | 109.5      |
| C(10B)-C(11B)-H(11B) | 104.6      | C(10B)-C(18B)-H(18F) | 109.5      |
| C(13B)-C(12B)-C(11B) | 109.2(2)   | H(18D)-C(18B)-H(18F) | 109.5      |
| C(13B)-C(12B)-H(12C) | 109.8      | H(18E)-C(18B)-H(18F) | 109.5      |
| C(11B)-C(12B)-H(12C) | 109.8      | C(10B)-C(19B)-H(19D) | 109.5      |
| C(13B)-C(12B)-H(12D) | 109.8      | C(10B)-C(19B)-H(19E) | 109.5      |
| C(11B)-C(12B)-H(12D) | 109.8      | H(19D)-C(19B)-H(19E) | 109.5      |
| H(12C)-C(12B)-H(12D) | 108.3      | C(10B)-C(19B)-H(19F) | 109.5      |
| C(12B)-C(13B)-C(14B) | 114.10(18) | H(19D)-C(19B)-H(19F) | 109.5      |
| C(12B)-C(13B)-H(13C) | 108.7      | H(19E)-C(19B)-H(19F) | 109.5      |
| C(14B)-C(13B)-H(13C) | 108.7      | C(14B)-C(20B)-H(20D) | 109.5      |
| C(12B)-C(13B)-H(13D) | 108.7      | C(14B)-C(20B)-H(20E) | 109.5      |
| C(14B)-C(13B)-H(13D) | 108.7      | H(20D)-C(20B)-H(20E) | 109.5      |
| H(13C)-C(13B)-H(13D) | 107.6      | C(14B)-C(20B)-H(20F) | 109.5      |
| C(13B)-C(14B)-C(20B) | 108.6(2)   | H(20D)-C(20B)-H(20F) | 109.5      |
| C(13B)-C(14B)-C(15B) | 105.24(17) | H(20E)-C(20B)-H(20F) | 109.5      |
| C(20B)-C(14B)-C(15B) | 108.08(18) | C(1B)-O(1B)-H(1BB)   | 109.5      |
| C(13B)-C(14B)-C(5B)  | 109.09(17) |                      |            |
| C(20B)-C(14B)-C(5B)  | 114.71(17) |                      |            |
| C(15B)-C(14B)-C(5B)  | 110.64(19) |                      |            |

---

Symmetry transformations used to generate equivalent atoms:



Table 4. Anisotropic displacement parameters ( $\text{\AA}^2 \times 10^3$ ) for barekol (2). The anisotropic displacement factor exponent takes the form:  $-2\pi^2 [ h^2 a^{*2} U^{11} + \dots + 2 h k a^* b^* U^{12} ]$

|        | $U^{11}$ | $U^{22}$ | $U^{33}$ | $U^{23}$ | $U^{13}$ | $U^{12}$ |
|--------|----------|----------|----------|----------|----------|----------|
| C(1)   | 29(1)    | 31(1)    | 27(1)    | -9(1)    | -1(1)    | -6(1)    |
| C(2)   | 33(2)    | 24(1)    | 27(1)    | -2(1)    | 1(1)     | -8(1)    |
| C(3)   | 48(2)    | 22(1)    | 34(1)    | -6(1)    | 1(1)     | -12(1)   |
| C(4)   | 41(2)    | 19(1)    | 31(1)    | -8(1)    | 2(1)     | -8(1)    |
| C(5)   | 21(1)    | 23(1)    | 29(1)    | -9(1)    | 3(1)     | -10(1)   |
| C(6)   | 19(1)    | 19(1)    | 28(1)    | -7(1)    | 3(1)     | -6(1)    |
| C(7)   | 30(1)    | 25(1)    | 29(1)    | -8(1)    | 4(1)     | -11(1)   |
| C(8)   | 39(2)    | 31(1)    | 30(1)    | -13(1)   | 6(1)     | -15(1)   |
| C(9)   | 30(1)    | 36(1)    | 27(1)    | -6(1)    | 1(1)     | -14(1)   |
| C(10)  | 23(1)    | 27(1)    | 31(1)    | -5(1)    | 0(1)     | -8(1)    |
| C(11)  | 19(1)    | 22(1)    | 29(1)    | -6(1)    | 1(1)     | -6(1)    |
| C(12)  | 32(1)    | 18(1)    | 34(1)    | -6(1)    | -2(1)    | -6(1)    |
| C(13)  | 33(1)    | 19(1)    | 35(1)    | -11(1)   | 0(1)     | -3(1)    |
| C(14)  | 22(1)    | 20(1)    | 29(1)    | -10(1)   | -1(1)    | -4(1)    |
| C(15)  | 26(1)    | 26(1)    | 28(1)    | -9(1)    | 0(1)     | -3(1)    |
| C(16)  | 38(2)    | 36(1)    | 44(1)    | -9(1)    | -3(1)    | 0(1)     |
| C(17)  | 22(1)    | 30(1)    | 33(1)    | -6(1)    | 6(1)     | -9(1)    |
| C(18)  | 38(2)    | 32(1)    | 34(1)    | -2(1)    | 3(1)     | -16(1)   |
| C(19)  | 40(2)    | 37(1)    | 35(1)    | -3(1)    | -5(1)    | -5(1)    |
| C(20)  | 31(1)    | 29(1)    | 37(1)    | -9(1)    | -4(1)    | -14(1)   |
| O(1)   | 38(1)    | 46(1)    | 30(1)    | 0(1)     | 5(1)     | 0(1)     |
| C(1B)  | 24(1)    | 37(1)    | 25(1)    | -10(1)   | 3(1)     | -11(1)   |
| C(2B)  | 33(2)    | 31(1)    | 24(1)    | 1(1)     | 4(1)     | -9(1)    |
| C(3B)  | 57(2)    | 44(2)    | 27(1)    | 0(1)     | -1(1)    | 13(2)    |
| C(4B)  | 56(2)    | 22(1)    | 28(1)    | -5(1)    | 5(1)     | -11(1)   |
| C(5B)  | 23(1)    | 20(1)    | 25(1)    | -4(1)    | -2(1)    | -6(1)    |
| C(6B)  | 22(1)    | 22(1)    | 24(1)    | -5(1)    | -2(1)    | -8(1)    |
| C(7B)  | 29(1)    | 21(1)    | 27(1)    | -5(1)    | -3(1)    | -5(1)    |
| C(8B)  | 35(2)    | 30(1)    | 29(1)    | -12(1)   | 2(1)     | -5(1)    |
| C(9B)  | 29(1)    | 39(1)    | 24(1)    | -7(1)    | 2(1)     | -12(1)   |
| C(10B) | 27(1)    | 28(1)    | 25(1)    | -3(1)    | -1(1)    | -10(1)   |
| C(11B) | 21(1)    | 24(1)    | 26(1)    | -5(1)    | -2(1)    | -8(1)    |
| C(12B) | 29(1)    | 21(1)    | 31(1)    | -2(1)    | -1(1)    | -4(1)    |

|        |       |       |       |        |       |        |
|--------|-------|-------|-------|--------|-------|--------|
| C(13B) | 30(1) | 20(1) | 34(1) | -9(1)  | 3(1)  | -6(1)  |
| C(14B) | 22(1) | 23(1) | 25(1) | -7(1)  | 2(1)  | -6(1)  |
| C(15B) | 26(1) | 28(1) | 31(1) | -10(1) | 2(1)  | -7(1)  |
| C(16B) | 34(2) | 38(2) | 77(2) | 0(1)   | 3(2)  | -8(1)  |
| C(17B) | 36(2) | 34(1) | 32(1) | -7(1)  | -1(1) | -21(1) |
| C(18B) | 43(2) | 38(1) | 31(1) | 0(1)   | 5(1)  | -20(1) |
| C(19B) | 34(2) | 38(1) | 28(1) | -1(1)  | -8(1) | -11(1) |
| C(20B) | 25(1) | 38(1) | 36(1) | -11(1) | 6(1)  | -11(1) |
| O(1B)  | 34(1) | 48(1) | 26(1) | -14(1) | 3(1)  | -10(1) |

Table 5. Hydrogen coordinates ( $\times 10^4$ ) and isotropic displacement parameters ( $\text{\AA}^2 \times 10^{-3}$ ) for barekol (**2**).

|        | x     | y     | z    | U(eq) |
|--------|-------|-------|------|-------|
| H(1A)  | 3441  | 4857  | 7318 | 36    |
| H(3A)  | 1529  | 1816  | 6496 | 42    |
| H(3B)  | 4085  | 44    | 6477 | 42    |
| H(4A)  | 3444  | 1621  | 5437 | 37    |
| H(4B)  | 5281  | 2383  | 5703 | 37    |
| H(5A)  | 324   | 4662  | 5533 | 27    |
| H(7A)  | 3108  | 2514  | 4464 | 33    |
| H(7B)  | 314   | 3711  | 4540 | 33    |
| H(8A)  | 3122  | 4590  | 3478 | 39    |
| H(8B)  | 1198  | 3612  | 3443 | 39    |
| H(9A)  | -1892 | 6579  | 3610 | 37    |
| H(9B)  | -359  | 7065  | 3009 | 37    |
| H(11A) | -1140 | 7320  | 4693 | 29    |
| H(12A) | 2246  | 8976  | 4871 | 34    |
| H(12B) | -545  | 10298 | 4782 | 34    |
| H(13A) | -1395 | 8372  | 5704 | 36    |
| H(13B) | 422   | 9296  | 5888 | 36    |
| H(15A) | 79    | 7030  | 6766 | 34    |

|        |       |       |       |    |
|--------|-------|-------|-------|----|
| H(15B) | -401  | 5267  | 6526  | 34 |
| H(16)  | 7369  | 109   | 7123  | 52 |
| H(16A) | 6956  | 1937  | 7516  | 52 |
| H(17A) | 5033  | 5555  | 4140  | 43 |
| H(17B) | 5995  | 3772  | 4737  | 43 |
| H(17C) | 5240  | 6056  | 4838  | 43 |
| H(18A) | 1669  | 9328  | 3022  | 52 |
| H(18B) | 3533  | 7661  | 3532  | 52 |
| H(18C) | 2182  | 9899  | 3682  | 52 |
| H(19A) | -2524 | 10640 | 3241  | 61 |
| H(19B) | -2152 | 11160 | 3923  | 61 |
| H(19C) | -3626 | 9786  | 3877  | 61 |
| H(20A) | 4286  | 7219  | 6314  | 46 |
| H(20B) | 5077  | 6599  | 5618  | 46 |
| H(20C) | 5506  | 4897  | 6240  | 46 |
| H(10)  | 1774  | 2822  | 7866  | 53 |
| H(1BA) | 7425  | 7480  | -1651 | 34 |
| H(3B1) | 2147  | 10291 | -866  | 64 |
| H(3B2) | 3884  | 11104 | -1316 | 64 |
| H(4BA) | 5239  | 10036 | -249  | 44 |
| H(4BB) | 7158  | 8844  | -736  | 44 |
| H(5BA) | 4097  | 6964  | -192  | 28 |
| H(7BA) | 3803  | 9949  | 645   | 32 |
| H(7BB) | 2292  | 8576  | 649   | 32 |
| H(8BA) | 4890  | 8620  | 1739  | 39 |
| H(8BB) | 2049  | 9529  | 1676  | 39 |
| H(9BA) | 2023  | 6314  | 1717  | 37 |
| H(9BB) | 3383  | 6340  | 2337  | 37 |
| H(11B) | 4455  | 4830  | 788   | 28 |
| H(12C) | 9502  | 3245  | 779   | 34 |
| H(12D) | 7992  | 1849  | 956   | 34 |
| H(13C) | 6085  | 3054  | -61   | 34 |
| H(13D) | 8900  | 2082  | -155  | 34 |
| H(15C) | 7858  | 3942  | -1263 | 34 |
| H(15D) | 5172  | 4847  | -1033 | 34 |
| H(16B) | 1727  | 8140  | -2145 | 63 |
| H(16C) | 402   | 9877  | -1708 | 63 |
| H(17D) | 8060  | 8647  | 515   | 47 |

|        |       |      |       |    |
|--------|-------|------|-------|----|
| H(17E) | 9607  | 6283 | 609   | 47 |
| H(17F) | 8285  | 7304 | 1212  | 47 |
| H(18D) | 4882  | 2522 | 2389  | 55 |
| H(18E) | 6392  | 1541 | 1800  | 55 |
| H(18F) | 3610  | 2873 | 1712  | 55 |
| H(19D) | 7514  | 4231 | 2534  | 52 |
| H(19E) | 8258  | 5548 | 1937  | 52 |
| H(19F) | 9179  | 3161 | 1980  | 52 |
| H(20D) | 11073 | 3968 | -691  | 49 |
| H(20E) | 10684 | 5081 | -78   | 49 |
| H(20F) | 10036 | 6370 | -785  | 49 |
| H(1BB) | 7456  | 5539 | -2334 | 56 |

---

Table 6. Torsion angles [°] for barekol (**2**).

|                       |             |
|-----------------------|-------------|
| O(1)-C(1)-C(2)-C(16)  | -96.0(3)    |
| C(15)-C(1)-C(2)-C(16) | 146.4(2)    |
| O(1)-C(1)-C(2)-C(3)   | 83.9(2)     |
| C(15)-C(1)-C(2)-C(3)  | -33.7(3)    |
| C(16)-C(2)-C(3)-C(4)  | -95.5(3)    |
| C(1)-C(2)-C(3)-C(4)   | 84.7(3)     |
| C(2)-C(3)-C(4)-C(5)   | -74.1(3)    |
| C(3)-C(4)-C(5)-C(14)  | 55.6(3)     |
| C(3)-C(4)-C(5)-C(6)   | -171.6(2)   |
| C(4)-C(5)-C(6)-C(17)  | -61.1(2)    |
| C(14)-C(5)-C(6)-C(17) | 71.1(2)     |
| C(4)-C(5)-C(6)-C(7)   | 58.3(2)     |
| C(14)-C(5)-C(6)-C(7)  | -169.49(19) |
| C(4)-C(5)-C(6)-C(11)  | 173.95(17)  |
| C(14)-C(5)-C(6)-C(11) | -53.8(2)    |
| C(17)-C(6)-C(7)-C(8)  | -70.5(3)    |
| C(11)-C(6)-C(7)-C(8)  | 52.1(2)     |
| C(5)-C(6)-C(7)-C(8)   | 167.9(2)    |
| C(6)-C(7)-C(8)-C(9)   | -56.9(3)    |

|                           |             |
|---------------------------|-------------|
| C(7)-C(8)-C(9)-C(10)      | 55.9(3)     |
| C(8)-C(9)-C(10)-C(19)     | -168.87(19) |
| C(8)-C(9)-C(10)-C(18)     | 74.8(3)     |
| C(8)-C(9)-C(10)-C(11)     | -51.2(3)    |
| C(19)-C(10)-C(11)-C(12)   | -60.7(3)    |
| C(9)-C(10)-C(11)-C(12)    | -177.1(2)   |
| C(18)-C(10)-C(11)-C(12)   | 59.1(3)     |
| C(19)-C(10)-C(11)-C(6)    | 167.30(19)  |
| C(9)-C(10)-C(11)-C(6)     | 50.8(3)     |
| C(18)-C(10)-C(11)-C(6)    | -72.9(2)    |
| C(17)-C(6)-C(11)-C(12)    | -65.3(2)    |
| C(7)-C(6)-C(11)-C(12)     | 175.37(16)  |
| C(5)-C(6)-C(11)-C(12)     | 58.6(2)     |
| C(17)-C(6)-C(11)-C(10)    | 68.2(2)     |
| C(7)-C(6)-C(11)-C(10)     | -51.1(2)    |
| C(5)-C(6)-C(11)-C(10)     | -167.90(19) |
| C(10)-C(11)-C(12)-C(13)   | 163.0(2)    |
| C(6)-C(11)-C(12)-C(13)    | -61.7(2)    |
| C(11)-C(12)-C(13)-C(14)   | 58.3(3)     |
| C(12)-C(13)-C(14)-C(20)   | 74.9(2)     |
| C(12)-C(13)-C(14)-C(15)   | -167.4(2)   |
| C(12)-C(13)-C(14)-C(5)    | -50.6(3)    |
| C(4)-C(5)-C(14)-C(20)     | 57.5(2)     |
| C(6)-C(5)-C(14)-C(20)     | -73.3(3)    |
| C(4)-C(5)-C(14)-C(13)     | -179.88(18) |
| C(6)-C(5)-C(14)-C(13)     | 49.3(2)     |
| C(4)-C(5)-C(14)-C(15)     | -66.4(2)    |
| C(6)-C(5)-C(14)-C(15)     | 162.8(2)    |
| O(1)-C(1)-C(15)-C(14)     | -167.38(18) |
| C(2)-C(1)-C(15)-C(14)     | -47.5(3)    |
| C(20)-C(14)-C(15)-C(1)    | -38.2(3)    |
| C(13)-C(14)-C(15)-C(1)    | -155.5(2)   |
| C(5)-C(14)-C(15)-C(1)     | 88.3(2)     |
| O(1B)-C(1B)-C(2B)-C(16B)  | 22.3(3)     |
| C(15B)-C(1B)-C(2B)-C(16B) | -97.3(3)    |
| O(1B)-C(1B)-C(2B)-C(3B)   | -159.8(2)   |
| C(15B)-C(1B)-C(2B)-C(3B)  | 80.6(3)     |
| C(16B)-C(2B)-C(3B)-C(4B)  | 151.8(3)    |

|                             |             |
|-----------------------------|-------------|
| C(1B)-C(2B)-C(3B)-C(4B)     | -26.0(4)    |
| C(2B)-C(3B)-C(4B)-C(5B)     | -53.7(4)    |
| C(3B)-C(4B)-C(5B)-C(14B)    | 90.7(3)     |
| C(3B)-C(4B)-C(5B)-C(6B)     | -137.6(2)   |
| C(4B)-C(5B)-C(6B)-C(17B)    | -56.9(3)    |
| C(14B)-C(5B)-C(6B)-C(17B)   | 72.6(2)     |
| C(4B)-C(5B)-C(6B)-C(7B)     | 61.7(2)     |
| C(14B)-C(5B)-C(6B)-C(7B)    | -168.87(16) |
| C(4B)-C(5B)-C(6B)-C(11B)    | 177.3(2)    |
| C(14B)-C(5B)-C(6B)-C(11B)   | -53.3(2)    |
| C(17B)-C(6B)-C(7B)-C(8B)    | -71.4(2)    |
| C(11B)-C(6B)-C(7B)-C(8B)    | 53.1(2)     |
| C(5B)-C(6B)-C(7B)-C(8B)     | 168.22(18)  |
| C(6B)-C(7B)-C(8B)-C(9B)     | -57.2(3)    |
| C(7B)-C(8B)-C(9B)-C(10B)    | 57.1(3)     |
| C(8B)-C(9B)-C(10B)-C(19B)   | 74.1(2)     |
| C(8B)-C(9B)-C(10B)-C(18B)   | -168.6(2)   |
| C(8B)-C(9B)-C(10B)-C(11B)   | -52.4(2)    |
| C(17B)-C(6B)-C(11B)-C(12B)  | -64.4(2)    |
| C(7B)-C(6B)-C(11B)-C(12B)   | 174.94(18)  |
| C(5B)-C(6B)-C(11B)-C(12B)   | 59.3(2)     |
| C(17B)-C(6B)-C(11B)-C(10B)  | 68.5(3)     |
| C(7B)-C(6B)-C(11B)-C(10B)   | -52.1(3)    |
| C(5B)-C(6B)-C(11B)-C(10B)   | -167.72(18) |
| C(19B)-C(10B)-C(11B)-C(12B) | 58.5(3)     |
| C(9B)-C(10B)-C(11B)-C(12B)  | -177.16(19) |
| C(18B)-C(10B)-C(11B)-C(12B) | -61.5(3)    |
| C(19B)-C(10B)-C(11B)-C(6B)  | -72.8(3)    |
| C(9B)-C(10B)-C(11B)-C(6B)   | 51.5(2)     |
| C(18B)-C(10B)-C(11B)-C(6B)  | 167.2(2)    |
| C(6B)-C(11B)-C(12B)-C(13B)  | -63.5(2)    |
| C(10B)-C(11B)-C(12B)-C(13B) | 162.15(18)  |
| C(11B)-C(12B)-C(13B)-C(14B) | 59.3(3)     |
| C(12B)-C(13B)-C(14B)-C(20B) | 75.0(2)     |
| C(12B)-C(13B)-C(14B)-C(15B) | -169.4(2)   |
| C(12B)-C(13B)-C(14B)-C(5B)  | -50.7(3)    |
| C(4B)-C(5B)-C(14B)-C(13B)   | 178.7(2)    |
| C(6B)-C(5B)-C(14B)-C(13B)   | 48.7(2)     |

|                            |            |
|----------------------------|------------|
| C(4B)-C(5B)-C(14B)-C(20B)  | 56.6(3)    |
| C(6B)-C(5B)-C(14B)-C(20B)  | -73.4(2)   |
| C(4B)-C(5B)-C(14B)-C(15B)  | -66.0(2)   |
| C(6B)-C(5B)-C(14B)-C(15B)  | 164.06(17) |
| O(1B)-C(1B)-C(15B)-C(14B)  | 162.7(2)   |
| C(2B)-C(1B)-C(15B)-C(14B)  | -77.9(3)   |
| C(13B)-C(14B)-C(15B)-C(1B) | 174.8(2)   |
| C(20B)-C(14B)-C(15B)-C(1B) | -69.2(3)   |
| C(5B)-C(14B)-C(15B)-C(1B)  | 57.1(3)    |

---

Symmetry transformations used to generate equivalent atoms:

Table 7. Hydrogen bonds for barekol (**2**) [ $\text{\AA}$  and  $^\circ$ ].

| D-H...A               | d(D-H) | d(H...A) | d(D...A) | $\angle(\text{DHA})$ |
|-----------------------|--------|----------|----------|----------------------|
| O(1B)-H(1BB)...O(1)#1 | 0.84   | 1.99     | 2.816(3) | 168.4                |

---

Symmetry transformations used to generate equivalent atoms:

#1  $x+1, y, z-1$
